# Supplementary material
Source: publisher figshare collection journal article supplement (https://gsajournals.figshare.com/ndownloader/files/12778421)
Supplement: Supplementary file 1 [file 12778421]

## Sheet: A) Original ENSGs & deprecated
Ensembl Compara (8984)	HomoloGene (3064)	InParanoid (7717)	OrthoMCL (7604)		All ENSGs in OL1.0 (11,416)		Deprecated to Remove from OL1.0 (574)
ENSG00000000003	ENSG00000000419	ENSG00000000419	ENSG00000000419		ENSG00000000003		ENSG00000006114
ENSG00000000419	ENSG00000001036	ENSG00000000938	ENSG00000000938		ENSG00000000419		ENSG00000007816
ENSG00000000938	ENSG00000001084	ENSG00000001036	ENSG00000001036		ENSG00000000938		ENSG00000017373
ENSG00000001084	ENSG00000001561	ENSG00000001084	ENSG00000001084		ENSG00000001084		ENSG00000017621
ENSG00000001167	ENSG00000001631	ENSG00000001167	ENSG00000001167		ENSG00000001167		ENSG00000023843
ENSG00000001461	ENSG00000002745	ENSG00000001561	ENSG00000001561		ENSG00000001461		ENSG00000031544
ENSG00000001497	ENSG00000003147	ENSG00000001631	ENSG00000001631		ENSG00000001497		ENSG00000042022
ENSG00000001561	ENSG00000003509	ENSG00000002745	ENSG00000002745		ENSG00000001561		ENSG00000049319
ENSG00000001626	ENSG00000003756	ENSG00000002746	ENSG00000002746		ENSG00000001626		ENSG00000051415
ENSG00000001631	ENSG00000003989	ENSG00000002834	ENSG00000002834		ENSG00000001631		ENSG00000056661
ENSG00000002587	ENSG00000004455	ENSG00000003147	ENSG00000003147		ENSG00000002587		ENSG00000068793
ENSG00000002745	ENSG00000004478	ENSG00000003400	ENSG00000003509		ENSG00000002745		ENSG00000079782
ENSG00000002746	ENSG00000004487	ENSG00000003436	ENSG00000003756		ENSG00000002746		ENSG00000083842
ENSG00000002834	ENSG00000004660	ENSG00000003509	ENSG00000003987		ENSG00000002834		ENSG00000087916
ENSG00000003147	ENSG00000004700	ENSG00000003756	ENSG00000003989		ENSG00000003147		ENSG00000090920
ENSG00000003436	ENSG00000004766	ENSG00000003987	ENSG00000004059		ENSG00000003436		ENSG00000096238
ENSG00000003509	ENSG00000004866	ENSG00000004059	ENSG00000004139		ENSG00000003509		ENSG00000096467
ENSG00000003756	ENSG00000005007	ENSG00000004139	ENSG00000004399		ENSG00000003756		ENSG00000096474
ENSG00000003987	ENSG00000005075	ENSG00000004455	ENSG00000004455		ENSG00000003987		ENSG00000099882
ENSG00000003989	ENSG00000005469	ENSG00000004478	ENSG00000004478		ENSG00000003989		ENSG00000100829
ENSG00000004059	ENSG00000005810	ENSG00000004660	ENSG00000004487		ENSG00000004059		ENSG00000100931
ENSG00000004139	ENSG00000006282	ENSG00000004700	ENSG00000004660		ENSG00000004139		ENSG00000101321
ENSG00000004399	ENSG00000006451	ENSG00000004766	ENSG00000004700		ENSG00000004399		ENSG00000102069
ENSG00000004455	ENSG00000006625	ENSG00000004776	ENSG00000004766		ENSG00000004455		ENSG00000102080
ENSG00000004478	ENSG00000006652	ENSG00000004777	ENSG00000004777		ENSG00000004478		ENSG00000105132
ENSG00000004487	ENSG00000006695	ENSG00000004779	ENSG00000004779		ENSG00000004487		ENSG00000105216
ENSG00000004534	ENSG00000006712	ENSG00000004799	ENSG00000004846		ENSG00000004534		ENSG00000105972
ENSG00000004660	ENSG00000006744	ENSG00000004846	ENSG00000004848		ENSG00000004660		ENSG00000107623
ENSG00000004700	ENSG00000006757	ENSG00000004848	ENSG00000004864		ENSG00000004700		ENSG00000108264
ENSG00000004766	ENSG00000007062	ENSG00000004864	ENSG00000004866		ENSG00000004766		ENSG00000108270
ENSG00000004776	ENSG00000007080	ENSG00000004866	ENSG00000004897		ENSG00000004776		ENSG00000108292
ENSG00000004777	ENSG00000007168	ENSG00000004897	ENSG00000004939		ENSG00000004777		ENSG00000108294
ENSG00000004779	ENSG00000007202	ENSG00000004948	ENSG00000004948		ENSG00000004779		ENSG00000108296
ENSG00000004799	ENSG00000007372	ENSG00000004961	ENSG00000004961		ENSG00000004799		ENSG00000108504
ENSG00000004809	ENSG00000007516	ENSG00000004975	ENSG00000004975		ENSG00000004809		ENSG00000108753
ENSG00000004846	ENSG00000007520	ENSG00000005001	ENSG00000005007		ENSG00000004846		ENSG00000110347
ENSG00000004864	ENSG00000007541	ENSG00000005007	ENSG00000005022		ENSG00000004864		ENSG00000112049
ENSG00000004866	ENSG00000007923	ENSG00000005022	ENSG00000005059		ENSG00000004866		ENSG00000112498
ENSG00000004897	ENSG00000008018	ENSG00000005059	ENSG00000005075		ENSG00000004897		ENSG00000112664
ENSG00000004939	ENSG00000008294	ENSG00000005073	ENSG00000005189		ENSG00000004939		ENSG00000112727
ENSG00000004948	ENSG00000008869	ENSG00000005075	ENSG00000005194		ENSG00000004948		ENSG00000117289
ENSG00000004961	ENSG00000008952	ENSG00000005175	ENSG00000005206		ENSG00000004961		ENSG00000120087
ENSG00000004975	ENSG00000008988	ENSG00000005194	ENSG00000005243		ENSG00000004975		ENSG00000120586
ENSG00000005007	ENSG00000009413	ENSG00000005243	ENSG00000005249		ENSG00000005007		ENSG00000121031
ENSG00000005022	ENSG00000009765	ENSG00000005339	ENSG00000005339		ENSG00000005022		ENSG00000121083
ENSG00000005059	ENSG00000009844	ENSG00000005379	ENSG00000005379		ENSG00000005059		ENSG00000121848
ENSG00000005073	ENSG00000010165	ENSG00000005421	ENSG00000005381		ENSG00000005073		ENSG00000122854
ENSG00000005075	ENSG00000010244	ENSG00000005436	ENSG00000005448		ENSG00000005075		ENSG00000124529
ENSG00000005100	ENSG00000010256	ENSG00000005448	ENSG00000005469		ENSG00000005100		ENSG00000124578
ENSG00000005102	ENSG00000010292	ENSG00000005469	ENSG00000005471		ENSG00000005102		ENSG00000124693
ENSG00000005108	ENSG00000010322	ENSG00000005471	ENSG00000005810		ENSG00000005108		ENSG00000127388
ENSG00000005156	ENSG00000010810	ENSG00000005483	ENSG00000005882		ENSG00000005156		ENSG00000128802
ENSG00000005189	ENSG00000011114	ENSG00000005513	ENSG00000005884		ENSG00000005189		ENSG00000129270
ENSG00000005194	ENSG00000011198	ENSG00000005810	ENSG00000005961		ENSG00000005194		ENSG00000129282
ENSG00000005206	ENSG00000011201	ENSG00000005882	ENSG00000006007		ENSG00000005206		ENSG00000130201
ENSG00000005243	ENSG00000011304	ENSG00000005884	ENSG00000006025		ENSG00000005243		ENSG00000131003
ENSG00000005339	ENSG00000011454	ENSG00000005961	ENSG00000006042		ENSG00000005339		ENSG00000131795
ENSG00000005379	ENSG00000011485	ENSG00000006007	ENSG00000006071		ENSG00000005379		ENSG00000132130
ENSG00000005421	ENSG00000011566	ENSG00000006047	ENSG00000006125		ENSG00000005421		ENSG00000132142
ENSG00000005436	ENSG00000011677	ENSG00000006116	ENSG00000006282		ENSG00000005436		ENSG00000132498
ENSG00000005448	ENSG00000012174	ENSG00000006118	ENSG00000006283		ENSG00000005448		ENSG00000135213
ENSG00000005469	ENSG00000012232	ENSG00000006125	ENSG00000006432		ENSG00000005469		ENSG00000135847
ENSG00000005471	ENSG00000012963	ENSG00000006194	ENSG00000006451		ENSG00000005471		ENSG00000136653
ENSG00000005483	ENSG00000013275	ENSG00000006282	ENSG00000006459		ENSG00000005483		ENSG00000136805
ENSG00000005810	ENSG00000013375	ENSG00000006283	ENSG00000006530		ENSG00000005810		ENSG00000137259
ENSG00000005882	ENSG00000013503	ENSG00000006377	ENSG00000006534		ENSG00000005882		ENSG00000137330
ENSG00000005884	ENSG00000013561	ENSG00000006432	ENSG00000006607		ENSG00000005884		ENSG00000137379
ENSG00000005961	ENSG00000014123	ENSG00000006451	ENSG00000006625		ENSG00000005961		ENSG00000138041
ENSG00000006007	ENSG00000014824	ENSG00000006459	ENSG00000006652		ENSG00000006007		ENSG00000138297
ENSG00000006042	ENSG00000016082	ENSG00000006530	ENSG00000006695		ENSG00000006042		ENSG00000138784
ENSG00000006047	ENSG00000016391	ENSG00000006534	ENSG00000006712		ENSG00000006047		ENSG00000139357
ENSG00000006114	ENSG00000017260	ENSG00000006607	ENSG00000006715		ENSG00000006114		ENSG00000141141
ENSG00000006118	ENSG00000017797	ENSG00000006625	ENSG00000006740		ENSG00000006118		ENSG00000141720
ENSG00000006125	ENSG00000018236	ENSG00000006652	ENSG00000006744		ENSG00000006125		ENSG00000143466
ENSG00000006282	ENSG00000018510	ENSG00000006695	ENSG00000006747		ENSG00000006282		ENSG00000147382
ENSG00000006283	ENSG00000018610	ENSG00000006712	ENSG00000006756		ENSG00000006283		ENSG00000147402
ENSG00000006451	ENSG00000018699	ENSG00000006715	ENSG00000006757		ENSG00000006451		ENSG00000147507
ENSG00000006459	ENSG00000019186	ENSG00000006740	ENSG00000006788		ENSG00000006459		ENSG00000150086
ENSG00000006468	ENSG00000019549	ENSG00000006744	ENSG00000006831		ENSG00000006468		ENSG00000151514
ENSG00000006530	ENSG00000020426	ENSG00000006756	ENSG00000007001		ENSG00000006530		ENSG00000151539
ENSG00000006534	ENSG00000020922	ENSG00000006757	ENSG00000007047		ENSG00000006534		ENSG00000151792
ENSG00000006607	ENSG00000021574	ENSG00000006788	ENSG00000007062		ENSG00000006607		ENSG00000152268
ENSG00000006625	ENSG00000021776	ENSG00000006831	ENSG00000007080		ENSG00000006625		ENSG00000152428
ENSG00000006652	ENSG00000022277	ENSG00000007001	ENSG00000007168		ENSG00000006652		ENSG00000153807
ENSG00000006695	ENSG00000023041	ENSG00000007038	ENSG00000007174		ENSG00000006695		ENSG00000154035
ENSG00000006712	ENSG00000023228	ENSG00000007047	ENSG00000007202		ENSG00000006712		ENSG00000155984
ENSG00000006715	ENSG00000023318	ENSG00000007062	ENSG00000007216		ENSG00000006715		ENSG00000157828
ENSG00000006740	ENSG00000023697	ENSG00000007168	ENSG00000007341		ENSG00000006740		ENSG00000160828
ENSG00000006744	ENSG00000023909	ENSG00000007202	ENSG00000007350		ENSG00000006744		ENSG00000160967
ENSG00000006747	ENSG00000025423	ENSG00000007216	ENSG00000007372		ENSG00000006747		ENSG00000161326
ENSG00000006756	ENSG00000025796	ENSG00000007255	ENSG00000007384		ENSG00000006756		ENSG00000161583
ENSG00000006757	ENSG00000027001	ENSG00000007264	ENSG00000007392		ENSG00000006757		ENSG00000162290
ENSG00000006831	ENSG00000027847	ENSG00000007341	ENSG00000007516		ENSG00000006831		ENSG00000162647
ENSG00000007001	ENSG00000028839	ENSG00000007372	ENSG00000007520		ENSG00000007001		ENSG00000163067
ENSG00000007047	ENSG00000029364	ENSG00000007384	ENSG00000007541		ENSG00000007047		ENSG00000163113
ENSG00000007062	ENSG00000029639	ENSG00000007392	ENSG00000007866		ENSG00000007062		ENSG00000163486
ENSG00000007080	ENSG00000029725	ENSG00000007402	ENSG00000007923		ENSG00000007080		ENSG00000163526
ENSG00000007168	ENSG00000032389	ENSG00000007516	ENSG00000007933		ENSG00000007168		ENSG00000165659
ENSG00000007202	ENSG00000032742	ENSG00000007520	ENSG00000007952		ENSG00000007202		ENSG00000166748
ENSG00000007216	ENSG00000033050	ENSG00000007816	ENSG00000007968		ENSG00000007216		ENSG00000167383
ENSG00000007255	ENSG00000033170	ENSG00000007866	ENSG00000008018		ENSG00000007255		ENSG00000167433
ENSG00000007341	ENSG00000033627	ENSG00000007908	ENSG00000008056		ENSG00000007341		ENSG00000168242
ENSG00000007350	ENSG00000033867	ENSG00000007923	ENSG00000008086		ENSG00000007350		ENSG00000168274
ENSG00000007372	ENSG00000035141	ENSG00000007933	ENSG00000008118		ENSG00000007372		ENSG00000168738
ENSG00000007384	ENSG00000035687	ENSG00000007968	ENSG00000008256		ENSG00000007384		ENSG00000168775
ENSG00000007392	ENSG00000035928	ENSG00000008018	ENSG00000008277		ENSG00000007392		ENSG00000170616
ENSG00000007402	ENSG00000036054	ENSG00000008056	ENSG00000008282		ENSG00000007402		ENSG00000170727
ENSG00000007516	ENSG00000036257	ENSG00000008128	ENSG00000008283		ENSG00000007516		ENSG00000170941
ENSG00000007520	ENSG00000037474	ENSG00000008196	ENSG00000008294		ENSG00000007520		ENSG00000171142
ENSG00000007541	ENSG00000037757	ENSG00000008197	ENSG00000008311		ENSG00000007541		ENSG00000171471
ENSG00000007545	ENSG00000037897	ENSG00000008256	ENSG00000008516		ENSG00000007545		ENSG00000172660
ENSG00000007866	ENSG00000038295	ENSG00000008282	ENSG00000008869		ENSG00000007866		ENSG00000173088
ENSG00000007923	ENSG00000038382	ENSG00000008283	ENSG00000008952		ENSG00000007923		ENSG00000173566
ENSG00000007933	ENSG00000038532	ENSG00000008294	ENSG00000008988		ENSG00000007933		ENSG00000174093
ENSG00000007968	ENSG00000039123	ENSG00000008311	ENSG00000009335		ENSG00000007968		ENSG00000174100
ENSG00000008018	ENSG00000039650	ENSG00000008323	ENSG00000009413		ENSG00000008018		ENSG00000174111
ENSG00000008056	ENSG00000039987	ENSG00000008441	ENSG00000009694		ENSG00000008056		ENSG00000174194
ENSG00000008083	ENSG00000040199	ENSG00000008516	ENSG00000009709		ENSG00000008083		ENSG00000174368
ENSG00000008118	ENSG00000040487	ENSG00000008735	ENSG00000009765		ENSG00000008118		ENSG00000174374
ENSG00000008128	ENSG00000040531	ENSG00000008869	ENSG00000009780		ENSG00000008128		ENSG00000174595
ENSG00000008196	ENSG00000041357	ENSG00000008952	ENSG00000009844		ENSG00000008196		ENSG00000175176
ENSG00000008197	ENSG00000041802	ENSG00000008988	ENSG00000010017		ENSG00000008197		ENSG00000175388
ENSG00000008256	ENSG00000042088	ENSG00000009335	ENSG00000010072		ENSG00000008256		ENSG00000175818
ENSG00000008277	ENSG00000042753	ENSG00000009413	ENSG00000010165		ENSG00000008277		ENSG00000176201
ENSG00000008282	ENSG00000043514	ENSG00000009694	ENSG00000010219		ENSG00000008282		ENSG00000176274
ENSG00000008283	ENSG00000044446	ENSG00000009765	ENSG00000010244		ENSG00000008283		ENSG00000176276
ENSG00000008294	ENSG00000044574	ENSG00000009780	ENSG00000010256		ENSG00000008294		ENSG00000177764
ENSG00000008311	ENSG00000047056	ENSG00000009950	ENSG00000010292		ENSG00000008311		ENSG00000178729
ENSG00000008323	ENSG00000047249	ENSG00000010017	ENSG00000010322		ENSG00000008323		ENSG00000179036
ENSG00000008441	ENSG00000047315	ENSG00000010030	ENSG00000010379		ENSG00000008441		ENSG00000179087
ENSG00000008710	ENSG00000047578	ENSG00000010072	ENSG00000010438		ENSG00000008710		ENSG00000179837
ENSG00000008735	ENSG00000047621	ENSG00000010165	ENSG00000010810		ENSG00000008735		ENSG00000180771
ENSG00000008853	ENSG00000047932	ENSG00000010244	ENSG00000010932		ENSG00000008853		ENSG00000182217
ENSG00000008869	ENSG00000048707	ENSG00000010256	ENSG00000011007		ENSG00000008869		ENSG00000182242
ENSG00000008952	ENSG00000049245	ENSG00000010292	ENSG00000011009		ENSG00000008952		ENSG00000182314
ENSG00000008988	ENSG00000049618	ENSG00000010810	ENSG00000011028		ENSG00000008988		ENSG00000182498
ENSG00000009335	ENSG00000049656	ENSG00000010932	ENSG00000011052		ENSG00000009335		ENSG00000182500
ENSG00000009413	ENSG00000049860	ENSG00000011007	ENSG00000011083		ENSG00000009413		ENSG00000182502
ENSG00000009709	ENSG00000050130	ENSG00000011009	ENSG00000011105		ENSG00000009709		ENSG00000182572
ENSG00000009765	ENSG00000051180	ENSG00000011052	ENSG00000011114		ENSG00000009765		ENSG00000182611
ENSG00000009780	ENSG00000052749	ENSG00000011198	ENSG00000011198		ENSG00000009780		ENSG00000183038
ENSG00000009790	ENSG00000052841	ENSG00000011201	ENSG00000011201		ENSG00000009790		ENSG00000183093
ENSG00000009950	ENSG00000053372	ENSG00000011258	ENSG00000011258		ENSG00000009950		ENSG00000183403
ENSG00000010017	ENSG00000053918	ENSG00000011260	ENSG00000011260		ENSG00000010017		ENSG00000183405
ENSG00000010030	ENSG00000054148	ENSG00000011295	ENSG00000011295		ENSG00000010030		ENSG00000183473
ENSG00000010072	ENSG00000054392	ENSG00000011304	ENSG00000011304		ENSG00000010072		ENSG00000183558
ENSG00000010165	ENSG00000055044	ENSG00000011332	ENSG00000011376		ENSG00000010165		ENSG00000183748
ENSG00000010219	ENSG00000055130	ENSG00000011376	ENSG00000011405		ENSG00000010219		ENSG00000183941
ENSG00000010244	ENSG00000055732	ENSG00000011405	ENSG00000011426		ENSG00000010244		ENSG00000184348
ENSG00000010256	ENSG00000057468	ENSG00000011426	ENSG00000011454		ENSG00000010256		ENSG00000184674
ENSG00000010270	ENSG00000057663	ENSG00000011454	ENSG00000011478		ENSG00000010270		ENSG00000184701
ENSG00000010278	ENSG00000057757	ENSG00000011478	ENSG00000011485		ENSG00000010278		ENSG00000184779
ENSG00000010282	ENSG00000057935	ENSG00000011485	ENSG00000011566		ENSG00000010282		ENSG00000184825
ENSG00000010292	ENSG00000058272	ENSG00000011566	ENSG00000012061		ENSG00000010292		ENSG00000184886
ENSG00000010322	ENSG00000058453	ENSG00000012048	ENSG00000012174		ENSG00000010322		ENSG00000184902
ENSG00000010810	ENSG00000058799	ENSG00000012061	ENSG00000012232		ENSG00000010810		ENSG00000185036
ENSG00000010932	ENSG00000059758	ENSG00000012174	ENSG00000012817		ENSG00000010932		ENSG00000185041
ENSG00000011007	ENSG00000059769	ENSG00000012211	ENSG00000012963		ENSG00000011007		ENSG00000185051
ENSG00000011009	ENSG00000060069	ENSG00000012232	ENSG00000012983		ENSG00000011009		ENSG00000185057
ENSG00000011028	ENSG00000060339	ENSG00000012504	ENSG00000013016		ENSG00000011028		ENSG00000185068
ENSG00000011052	ENSG00000060642	ENSG00000012817	ENSG00000013275		ENSG00000011052		ENSG00000185128
ENSG00000011083	ENSG00000060688	ENSG00000012963	ENSG00000013306		ENSG00000011083		ENSG00000185254
ENSG00000011114	ENSG00000060762	ENSG00000012983	ENSG00000013375		ENSG00000011114		ENSG00000185554
ENSG00000011132	ENSG00000061676	ENSG00000013016	ENSG00000013441		ENSG00000011132		ENSG00000185602
ENSG00000011198	ENSG00000061936	ENSG00000013275	ENSG00000013503		ENSG00000011198		ENSG00000185945
ENSG00000011201	ENSG00000061938	ENSG00000013306	ENSG00000013561		ENSG00000011201		ENSG00000185984
ENSG00000011258	ENSG00000061987	ENSG00000013375	ENSG00000013573		ENSG00000011258		ENSG00000186223
ENSG00000011260	ENSG00000062096	ENSG00000013503	ENSG00000014123		ENSG00000011260		ENSG00000186232
ENSG00000011295	ENSG00000062485	ENSG00000013561	ENSG00000014138		ENSG00000011295		ENSG00000186530
ENSG00000011304	ENSG00000062524	ENSG00000013573	ENSG00000014216		ENSG00000011304		ENSG00000186629
ENSG00000011332	ENSG00000062598	ENSG00000014123	ENSG00000014257		ENSG00000011332		ENSG00000187008
ENSG00000011347	ENSG00000062650	ENSG00000014138	ENSG00000014641		ENSG00000011347		ENSG00000187145
ENSG00000011376	ENSG00000062822	ENSG00000014216	ENSG00000014824		ENSG00000011376		ENSG00000187711
ENSG00000011405	ENSG00000063176	ENSG00000014257	ENSG00000014919		ENSG00000011405		ENSG00000187786
ENSG00000011426	ENSG00000063177	ENSG00000014641	ENSG00000015133		ENSG00000011426		ENSG00000187939
ENSG00000011454	ENSG00000063244	ENSG00000014824	ENSG00000015171		ENSG00000011454		ENSG00000187990
ENSG00000011478	ENSG00000063761	ENSG00000014919	ENSG00000015285		ENSG00000011478		ENSG00000188014
ENSG00000011485	ENSG00000063854	ENSG00000015133	ENSG00000015520		ENSG00000011485		ENSG00000188073
ENSG00000011566	ENSG00000064102	ENSG00000015153	ENSG00000015532		ENSG00000011566		ENSG00000188126
ENSG00000012061	ENSG00000064313	ENSG00000015285	ENSG00000015568		ENSG00000012061		ENSG00000188447
ENSG00000012174	ENSG00000064419	ENSG00000015520	ENSG00000016082		ENSG00000012174		ENSG00000188477
ENSG00000012211	ENSG00000064601	ENSG00000015532	ENSG00000016391		ENSG00000012211		ENSG00000188686
ENSG00000012232	ENSG00000064651	ENSG00000016082	ENSG00000017260		ENSG00000012232		ENSG00000188699
ENSG00000012817	ENSG00000064655	ENSG00000016391	ENSG00000017373		ENSG00000012817		ENSG00000188792
ENSG00000012963	ENSG00000064995	ENSG00000017260	ENSG00000017797		ENSG00000012963		ENSG00000188863
ENSG00000012983	ENSG00000065000	ENSG00000017373	ENSG00000018280		ENSG00000012983		ENSG00000188888
ENSG00000013016	ENSG00000065057	ENSG00000017483	ENSG00000018510		ENSG00000013016		ENSG00000188987
ENSG00000013275	ENSG00000065150	ENSG00000017797	ENSG00000018610		ENSG00000013275		ENSG00000196176
ENSG00000013293	ENSG00000065154	ENSG00000018189	ENSG00000018625		ENSG00000013293		ENSG00000196226
ENSG00000013306	ENSG00000065183	ENSG00000018280	ENSG00000018699		ENSG00000013306		ENSG00000196285
ENSG00000013375	ENSG00000065268	ENSG00000018510	ENSG00000019186		ENSG00000013375		ENSG00000196292
ENSG00000013441	ENSG00000065320	ENSG00000018610	ENSG00000019549		ENSG00000013441		ENSG00000196318
ENSG00000013503	ENSG00000065328	ENSG00000018625	ENSG00000020426		ENSG00000013503		ENSG00000196331
ENSG00000013523	ENSG00000065491	ENSG00000018699	ENSG00000020922		ENSG00000013523		ENSG00000196347
ENSG00000013561	ENSG00000065548	ENSG00000019102	ENSG00000021355		ENSG00000013561		ENSG00000196374
ENSG00000013573	ENSG00000065559	ENSG00000019169	ENSG00000021461		ENSG00000013573		ENSG00000196409
ENSG00000014123	ENSG00000065609	ENSG00000019186	ENSG00000021488		ENSG00000014123		ENSG00000196532
ENSG00000014138	ENSG00000065615	ENSG00000019549	ENSG00000021574		ENSG00000014138		ENSG00000196585
ENSG00000014216	ENSG00000065665	ENSG00000020426	ENSG00000021645		ENSG00000014216		ENSG00000196622
ENSG00000014257	ENSG00000065923	ENSG00000020633	ENSG00000021762		ENSG00000014257		ENSG00000196624
ENSG00000014641	ENSG00000066032	ENSG00000020922	ENSG00000021776		ENSG00000014641		ENSG00000196644
ENSG00000014824	ENSG00000066044	ENSG00000021355	ENSG00000021826		ENSG00000014824		ENSG00000196774
ENSG00000014919	ENSG00000066230	ENSG00000021461	ENSG00000022277		ENSG00000014919		ENSG00000196934
ENSG00000015133	ENSG00000066427	ENSG00000021574	ENSG00000023041		ENSG00000015133		ENSG00000196966
ENSG00000015171	ENSG00000066455	ENSG00000021762	ENSG00000023171		ENSG00000015171		ENSG00000197370
ENSG00000015285	ENSG00000066583	ENSG00000021776	ENSG00000023228		ENSG00000015285		ENSG00000197459
ENSG00000015520	ENSG00000066651	ENSG00000022277	ENSG00000023287		ENSG00000015520		ENSG00000197533
ENSG00000015532	ENSG00000066739	ENSG00000023041	ENSG00000023318		ENSG00000015532		ENSG00000197592
ENSG00000015676	ENSG00000066777	ENSG00000023171	ENSG00000023330		ENSG00000015676		ENSG00000197681
ENSG00000016082	ENSG00000066933	ENSG00000023228	ENSG00000023572		ENSG00000016082		ENSG00000197697
ENSG00000016391	ENSG00000067048	ENSG00000023287	ENSG00000023608		ENSG00000016391		ENSG00000197701
ENSG00000017260	ENSG00000067113	ENSG00000023318	ENSG00000023697		ENSG00000017260		ENSG00000197800
ENSG00000017621	ENSG00000067167	ENSG00000023572	ENSG00000023839		ENSG00000017621		ENSG00000197846
ENSG00000017797	ENSG00000067221	ENSG00000023608	ENSG00000023843		ENSG00000017797		ENSG00000197914
ENSG00000018280	ENSG00000067334	ENSG00000023697	ENSG00000023909		ENSG00000018280		ENSG00000197918
ENSG00000018510	ENSG00000067596	ENSG00000023839	ENSG00000024048		ENSG00000018510		ENSG00000198014
ENSG00000018610	ENSG00000067715	ENSG00000023892	ENSG00000024422		ENSG00000018610		ENSG00000198035
ENSG00000018699	ENSG00000067992	ENSG00000023909	ENSG00000025039		ENSG00000018699		ENSG00000198161
ENSG00000019186	ENSG00000068078	ENSG00000024048	ENSG00000025796		ENSG00000019186		ENSG00000198327
ENSG00000019485	ENSG00000068120	ENSG00000025039	ENSG00000025800		ENSG00000019485		ENSG00000198339
ENSG00000019505	ENSG00000068366	ENSG00000025156	ENSG00000026297		ENSG00000019505		ENSG00000198366
ENSG00000019549	ENSG00000068383	ENSG00000025423	ENSG00000027001		ENSG00000019549		ENSG00000198374
ENSG00000019995	ENSG00000068400	ENSG00000025770	ENSG00000027075		ENSG00000019995		ENSG00000198477
ENSG00000020219	ENSG00000068654	ENSG00000025796	ENSG00000027644		ENSG00000020219		ENSG00000198518
ENSG00000020256	ENSG00000068784	ENSG00000026297	ENSG00000027847		ENSG00000020256		ENSG00000198558
ENSG00000020426	ENSG00000068793	ENSG00000027001	ENSG00000028528		ENSG00000020426		ENSG00000198632
ENSG00000020577	ENSG00000068796	ENSG00000027075	ENSG00000028839		ENSG00000020577		ENSG00000203813
ENSG00000020633	ENSG00000068885	ENSG00000027644	ENSG00000029364		ENSG00000020633		ENSG00000203835
ENSG00000020922	ENSG00000068912	ENSG00000027847	ENSG00000029639		ENSG00000020922		ENSG00000203847
ENSG00000021461	ENSG00000068976	ENSG00000028116	ENSG00000029725		ENSG00000021461		ENSG00000204164
ENSG00000021574	ENSG00000069020	ENSG00000028277	ENSG00000029993		ENSG00000021574		ENSG00000204169
ENSG00000021645	ENSG00000069188	ENSG00000028310	ENSG00000030582		ENSG00000021645		ENSG00000204517
ENSG00000021762	ENSG00000069329	ENSG00000028528	ENSG00000031544		ENSG00000021762		ENSG00000204533
ENSG00000021776	ENSG00000069345	ENSG00000029153	ENSG00000031698		ENSG00000021776		ENSG00000204771
ENSG00000022267	ENSG00000069869	ENSG00000029364	ENSG00000031823		ENSG00000022267		ENSG00000204775
ENSG00000022277	ENSG00000069966	ENSG00000029639	ENSG00000032219		ENSG00000022277		ENSG00000204793
ENSG00000023041	ENSG00000069974	ENSG00000029993	ENSG00000032389		ENSG00000023041		ENSG00000204828
ENSG00000023228	ENSG00000069998	ENSG00000030066	ENSG00000032444		ENSG00000023228		ENSG00000205141
ENSG00000023287	ENSG00000070010	ENSG00000030304	ENSG00000032742		ENSG00000023287		ENSG00000205152
ENSG00000023318	ENSG00000070081	ENSG00000031544	ENSG00000033011		ENSG00000023318		ENSG00000205242
ENSG00000023572	ENSG00000070367	ENSG00000031698	ENSG00000033030		ENSG00000023572		ENSG00000205246
ENSG00000023697	ENSG00000070495	ENSG00000032219	ENSG00000033050		ENSG00000023697		ENSG00000205272
ENSG00000023734	ENSG00000070748	ENSG00000032389	ENSG00000033100		ENSG00000023734		ENSG00000205273
ENSG00000023839	ENSG00000070761	ENSG00000032444	ENSG00000033170		ENSG00000023839		ENSG00000205527
ENSG00000023843	ENSG00000070785	ENSG00000032742	ENSG00000033178		ENSG00000023843		ENSG00000205535
ENSG00000023909	ENSG00000071051	ENSG00000033011	ENSG00000033627		ENSG00000023909		ENSG00000205536
ENSG00000024048	ENSG00000071082	ENSG00000033030	ENSG00000033800		ENSG00000024048		ENSG00000205561
ENSG00000024422	ENSG00000071127	ENSG00000033050	ENSG00000033867		ENSG00000024422		ENSG00000205570
ENSG00000025039	ENSG00000071189	ENSG00000033100	ENSG00000034053		ENSG00000025039		ENSG00000205575
ENSG00000025156	ENSG00000071243	ENSG00000033170	ENSG00000034152		ENSG00000025156		ENSG00000205685
ENSG00000025423	ENSG00000071537	ENSG00000033327	ENSG00000034677		ENSG00000025423		ENSG00000205779
ENSG00000025770	ENSG00000071539	ENSG00000033627	ENSG00000034693		ENSG00000025770		ENSG00000206156
ENSG00000025796	ENSG00000071967	ENSG00000033867	ENSG00000034713		ENSG00000025796		ENSG00000206163
ENSG00000026036	ENSG00000071994	ENSG00000034152	ENSG00000035141		ENSG00000026036		ENSG00000206211
ENSG00000026297	ENSG00000072062	ENSG00000034677	ENSG00000035403		ENSG00000026297		ENSG00000206212
ENSG00000026559	ENSG00000072110	ENSG00000034693	ENSG00000035687		ENSG00000026559		ENSG00000206216
ENSG00000027001	ENSG00000072134	ENSG00000035141	ENSG00000035862		ENSG00000027001		ENSG00000206217
ENSG00000027075	ENSG00000072210	ENSG00000035403	ENSG00000035928		ENSG00000027075		ENSG00000206234
ENSG00000027847	ENSG00000072310	ENSG00000035687	ENSG00000036054		ENSG00000027847		ENSG00000206247
ENSG00000027869	ENSG00000072415	ENSG00000035862	ENSG00000036257		ENSG00000027869		ENSG00000206254
ENSG00000028116	ENSG00000072778	ENSG00000035928	ENSG00000036530		ENSG00000028116		ENSG00000206255
ENSG00000028277	ENSG00000072786	ENSG00000036054	ENSG00000036565		ENSG00000028277		ENSG00000206266
ENSG00000028310	ENSG00000072803	ENSG00000036257	ENSG00000036672		ENSG00000028310		ENSG00000206267
ENSG00000028528	ENSG00000072849	ENSG00000036565	ENSG00000037042		ENSG00000028528		ENSG00000206334
ENSG00000028839	ENSG00000072958	ENSG00000037042	ENSG00000037241		ENSG00000028839		ENSG00000206397
ENSG00000029153	ENSG00000073067	ENSG00000037241	ENSG00000037474		ENSG00000029153		ENSG00000206405
ENSG00000029364	ENSG00000073111	ENSG00000037280	ENSG00000037757		ENSG00000029364		ENSG00000206410
ENSG00000029534	ENSG00000073417	ENSG00000037474	ENSG00000037897		ENSG00000029534		ENSG00000206429
ENSG00000029639	ENSG00000073536	ENSG00000037757	ENSG00000038002		ENSG00000029639		ENSG00000212867
ENSG00000029725	ENSG00000073578	ENSG00000037897	ENSG00000038210		ENSG00000029725		ENSG00000212884
ENSG00000030304	ENSG00000073712	ENSG00000037965	ENSG00000038295		ENSG00000030304		ENSG00000212886
ENSG00000030582	ENSG00000073969	ENSG00000038002	ENSG00000038358		ENSG00000030582		ENSG00000213818
ENSG00000031081	ENSG00000074054	ENSG00000038210	ENSG00000038382		ENSG00000031081		ENSG00000213861
ENSG00000031544	ENSG00000074319	ENSG00000038295	ENSG00000038532		ENSG00000031544		ENSG00000214014
ENSG00000031698	ENSG00000074582	ENSG00000038358	ENSG00000039123		ENSG00000031698		ENSG00000214272
ENSG00000031823	ENSG00000074621	ENSG00000038382	ENSG00000039139		ENSG00000031823		ENSG00000214311
ENSG00000032219	ENSG00000074695	ENSG00000038532	ENSG00000039319		ENSG00000032219		ENSG00000214320
ENSG00000032389	ENSG00000074800	ENSG00000039123	ENSG00000039650		ENSG00000032389		ENSG00000214325
ENSG00000032444	ENSG00000075234	ENSG00000039319	ENSG00000039987		ENSG00000032444		ENSG00000214564
ENSG00000032742	ENSG00000075239	ENSG00000039650	ENSG00000040199		ENSG00000032742		ENSG00000214611
ENSG00000033011	ENSG00000075303	ENSG00000039987	ENSG00000040341		ENSG00000033011		ENSG00000214619
ENSG00000033030	ENSG00000075336	ENSG00000040199	ENSG00000040487		ENSG00000033030		ENSG00000214627
ENSG00000033050	ENSG00000075415	ENSG00000040341	ENSG00000040531		ENSG00000033050		ENSG00000214636
ENSG00000033100	ENSG00000075539	ENSG00000040487	ENSG00000040933		ENSG00000033100		ENSG00000214677
ENSG00000033122	ENSG00000075651	ENSG00000040531	ENSG00000041353		ENSG00000033122		ENSG00000214730
ENSG00000033170	ENSG00000075711	ENSG00000040933	ENSG00000041357		ENSG00000033170		ENSG00000214793
ENSG00000033627	ENSG00000075856	ENSG00000041353	ENSG00000041802		ENSG00000033627		ENSG00000214801
ENSG00000033800	ENSG00000075914	ENSG00000041357	ENSG00000041982		ENSG00000033800		ENSG00000214802
ENSG00000033867	ENSG00000075945	ENSG00000042022	ENSG00000042022		ENSG00000033867		ENSG00000214873
ENSG00000034053	ENSG00000076003	ENSG00000042062	ENSG00000042088		ENSG00000034053		ENSG00000214885
ENSG00000034152	ENSG00000076043	ENSG00000042088	ENSG00000042429		ENSG00000034152		ENSG00000214982
ENSG00000034677	ENSG00000076201	ENSG00000042429	ENSG00000042753		ENSG00000034677		ENSG00000215042
ENSG00000034693	ENSG00000076248	ENSG00000042753	ENSG00000043093		ENSG00000034693		ENSG00000215046
ENSG00000035141	ENSG00000076321	ENSG00000043093	ENSG00000043143		ENSG00000035141		ENSG00000215079
ENSG00000035403	ENSG00000076356	ENSG00000043143	ENSG00000043355		ENSG00000035403		ENSG00000215103
ENSG00000035664	ENSG00000076513	ENSG00000043355	ENSG00000043514		ENSG00000035664		ENSG00000215211
ENSG00000035681	ENSG00000076650	ENSG00000043514	ENSG00000044115		ENSG00000035681		ENSG00000215292
ENSG00000035687	ENSG00000076685	ENSG00000044115	ENSG00000044446		ENSG00000035687		ENSG00000215315
ENSG00000035928	ENSG00000076716	ENSG00000044446	ENSG00000044524		ENSG00000035928		ENSG00000215428
ENSG00000036054	ENSG00000076864	ENSG00000044524	ENSG00000044574		ENSG00000036054		ENSG00000215443
ENSG00000036257	ENSG00000076924	ENSG00000044574	ENSG00000046647		ENSG00000036257		ENSG00000215557
ENSG00000036530	ENSG00000076984	ENSG00000047056	ENSG00000047056		ENSG00000036530		ENSG00000215608
ENSG00000036565	ENSG00000077044	ENSG00000047188	ENSG00000047188		ENSG00000036565		ENSG00000215615
ENSG00000036672	ENSG00000077147	ENSG00000047230	ENSG00000047230		ENSG00000036672		ENSG00000215631
ENSG00000037042	ENSG00000077232	ENSG00000047249	ENSG00000047249		ENSG00000037042		ENSG00000215639
ENSG00000037241	ENSG00000077235	ENSG00000047315	ENSG00000047315		ENSG00000037241		ENSG00000215696
ENSG00000037474	ENSG00000077312	ENSG00000047365	ENSG00000047410		ENSG00000037474		ENSG00000215698
ENSG00000037637	ENSG00000077348	ENSG00000047410	ENSG00000047578		ENSG00000037637		ENSG00000215699
ENSG00000037757	ENSG00000077380	ENSG00000047617	ENSG00000047617		ENSG00000037757		ENSG00000215719
ENSG00000037897	ENSG00000077458	ENSG00000047621	ENSG00000047621		ENSG00000037897		ENSG00000215729
ENSG00000038002	ENSG00000077549	ENSG00000047662	ENSG00000047648		ENSG00000038002		ENSG00000215750
ENSG00000038210	ENSG00000077721	ENSG00000047936	ENSG00000047932		ENSG00000038210		ENSG00000215762
ENSG00000038295	ENSG00000077943	ENSG00000048028	ENSG00000047936		ENSG00000038295		ENSG00000216522
ENSG00000038358	ENSG00000078070	ENSG00000048052	ENSG00000048028		ENSG00000038358		ENSG00000217794
ENSG00000038382	ENSG00000078098	ENSG00000048342	ENSG00000048052		ENSG00000038382		ENSG00000217945
ENSG00000038532	ENSG00000078140	ENSG00000048392	ENSG00000048342		ENSG00000038532		ENSG00000219830
ENSG00000039123	ENSG00000078142	ENSG00000048540	ENSG00000048392		ENSG00000039123		ENSG00000219860
ENSG00000039319	ENSG00000078369	ENSG00000048544	ENSG00000048544		ENSG00000039319		ENSG00000220023
ENSG00000039523	ENSG00000078808	ENSG00000048707	ENSG00000048707		ENSG00000039523		ENSG00000220107
ENSG00000039650	ENSG00000078902	ENSG00000048740	ENSG00000048740		ENSG00000039650		ENSG00000220191
ENSG00000039987	ENSG00000079134	ENSG00000048828	ENSG00000049192		ENSG00000039987		ENSG00000220474
ENSG00000040199	ENSG00000079215	ENSG00000048991	ENSG00000049245		ENSG00000040199		ENSG00000221927
ENSG00000040341	ENSG00000079277	ENSG00000049089	ENSG00000049283		ENSG00000040341		ENSG00000222040
ENSG00000040487	ENSG00000079335	ENSG00000049246	ENSG00000049319		ENSG00000040487		ENSG00000223468
ENSG00000040531	ENSG00000079785	ENSG00000049283	ENSG00000049541		ENSG00000040531		ENSG00000223524
ENSG00000040608	ENSG00000080007	ENSG00000049319	ENSG00000049618		ENSG00000040608		ENSG00000223526
ENSG00000040933	ENSG00000080189	ENSG00000049449	ENSG00000049656		ENSG00000040933		ENSG00000223936
ENSG00000041353	ENSG00000080371	ENSG00000049541	ENSG00000049759		ENSG00000041353		ENSG00000224010
ENSG00000041357	ENSG00000080608	ENSG00000049618	ENSG00000049860		ENSG00000041357		ENSG00000224125
ENSG00000041515	ENSG00000080815	ENSG00000049656	ENSG00000050130		ENSG00000041515		ENSG00000224171
ENSG00000042062	ENSG00000080986	ENSG00000049759	ENSG00000050438		ENSG00000042062		ENSG00000224213
ENSG00000042088	ENSG00000081307	ENSG00000049860	ENSG00000050555		ENSG00000042088		ENSG00000224226
ENSG00000042429	ENSG00000081479	ENSG00000050130	ENSG00000050748		ENSG00000042429		ENSG00000224512
ENSG00000042493	ENSG00000081760	ENSG00000050344	ENSG00000051009		ENSG00000042493		ENSG00000224624
ENSG00000042753	ENSG00000082068	ENSG00000050438	ENSG00000051180		ENSG00000042753		ENSG00000224726
ENSG00000042781	ENSG00000082269	ENSG00000050555	ENSG00000051341		ENSG00000042781		ENSG00000224737
ENSG00000042832	ENSG00000082512	ENSG00000050748	ENSG00000051382		ENSG00000042832		ENSG00000224824
ENSG00000043039	ENSG00000082701	ENSG00000051009	ENSG00000051415		ENSG00000043039		ENSG00000225273
ENSG00000043093	ENSG00000082898	ENSG00000051108	ENSG00000051596		ENSG00000043093		ENSG00000225388
ENSG00000043143	ENSG00000083097	ENSG00000051180	ENSG00000052749		ENSG00000043143		ENSG00000225485
ENSG00000043355	ENSG00000083123	ENSG00000051341	ENSG00000052841		ENSG00000043355		ENSG00000225547
ENSG00000043514	ENSG00000083223	ENSG00000051382	ENSG00000053372		ENSG00000043514		ENSG00000225566
ENSG00000043591	ENSG00000083290	ENSG00000051596	ENSG00000053501		ENSG00000043591		ENSG00000225631
ENSG00000044115	ENSG00000083312	ENSG00000052344	ENSG00000053524		ENSG00000044115		ENSG00000225688
ENSG00000044446	ENSG00000083520	ENSG00000052749	ENSG00000053747		ENSG00000044446		ENSG00000225749
ENSG00000044574	ENSG00000083544	ENSG00000052795	ENSG00000053918		ENSG00000044574		ENSG00000225753
ENSG00000046647	ENSG00000083642	ENSG00000052841	ENSG00000054116		ENSG00000046647		ENSG00000225754
ENSG00000046653	ENSG00000083720	ENSG00000052850	ENSG00000054219		ENSG00000046653		ENSG00000226151
ENSG00000046889	ENSG00000083750	ENSG00000053372	ENSG00000054267		ENSG00000046889		ENSG00000226219
ENSG00000047056	ENSG00000083845	ENSG00000053501	ENSG00000054356		ENSG00000047056		ENSG00000226460
ENSG00000047188	ENSG00000083857	ENSG00000053918	ENSG00000054392		ENSG00000047188		ENSG00000226760
ENSG00000047249	ENSG00000083937	ENSG00000054116	ENSG00000054523		ENSG00000047249		ENSG00000226817
ENSG00000047315	ENSG00000084072	ENSG00000054267	ENSG00000054611		ENSG00000047315		ENSG00000226907
ENSG00000047365	ENSG00000084073	ENSG00000054356	ENSG00000054690		ENSG00000047365		ENSG00000227184
ENSG00000047410	ENSG00000084092	ENSG00000054392	ENSG00000054793		ENSG00000047410		ENSG00000227226
ENSG00000047578	ENSG00000084207	ENSG00000054523	ENSG00000054796		ENSG00000047578		ENSG00000227324
ENSG00000047617	ENSG00000084623	ENSG00000054611	ENSG00000054983		ENSG00000047617		ENSG00000227328
ENSG00000047621	ENSG00000084733	ENSG00000054654	ENSG00000055044		ENSG00000047621		ENSG00000227385
ENSG00000047648	ENSG00000084754	ENSG00000054690	ENSG00000055118		ENSG00000047648		ENSG00000227504
ENSG00000047932	ENSG00000084774	ENSG00000054793	ENSG00000055130		ENSG00000047932		ENSG00000227561
ENSG00000048028	ENSG00000085117	ENSG00000054796	ENSG00000055163		ENSG00000048028		ENSG00000227731
ENSG00000048052	ENSG00000085365	ENSG00000054983	ENSG00000055483		ENSG00000048052		ENSG00000227798
ENSG00000048140	ENSG00000085415	ENSG00000055044	ENSG00000055609		ENSG00000048140		ENSG00000227866
ENSG00000048162	ENSG00000085433	ENSG00000055118	ENSG00000055732		ENSG00000048162		ENSG00000227978
ENSG00000048342	ENSG00000085563	ENSG00000055130	ENSG00000055917		ENSG00000048342		ENSG00000227996
ENSG00000048540	ENSG00000085662	ENSG00000055163	ENSG00000055950		ENSG00000048540		ENSG00000228117
ENSG00000048544	ENSG00000085721	ENSG00000055609	ENSG00000056050		ENSG00000048544		ENSG00000228273
ENSG00000048707	ENSG00000085760	ENSG00000055732	ENSG00000056586		ENSG00000048707		ENSG00000228279
ENSG00000048740	ENSG00000085872	ENSG00000055917	ENSG00000056998		ENSG00000048740		ENSG00000228332
ENSG00000048991	ENSG00000085978	ENSG00000055950	ENSG00000057149		ENSG00000048991		ENSG00000228545
ENSG00000049245	ENSG00000085999	ENSG00000056097	ENSG00000057252		ENSG00000049245		ENSG00000228693
ENSG00000049246	ENSG00000086061	ENSG00000056558	ENSG00000057468		ENSG00000049246		ENSG00000228715
ENSG00000049319	ENSG00000086065	ENSG00000056586	ENSG00000057608		ENSG00000049319		ENSG00000229113
ENSG00000049323	ENSG00000086189	ENSG00000056661	ENSG00000057657		ENSG00000049323		ENSG00000229318
ENSG00000049449	ENSG00000086205	ENSG00000056998	ENSG00000057663		ENSG00000049449		ENSG00000229397
ENSG00000049540	ENSG00000086589	ENSG00000057149	ENSG00000057757		ENSG00000049540		ENSG00000229490
ENSG00000049541	ENSG00000086598	ENSG00000057252	ENSG00000057935		ENSG00000049541		ENSG00000229542
ENSG00000049618	ENSG00000086717	ENSG00000057468	ENSG00000058056		ENSG00000049618		ENSG00000229584
ENSG00000049656	ENSG00000086827	ENSG00000057608	ENSG00000058063		ENSG00000049656		ENSG00000229631
ENSG00000049759	ENSG00000087008	ENSG00000057657	ENSG00000058085		ENSG00000049759		ENSG00000229845
ENSG00000049768	ENSG00000087076	ENSG00000057663	ENSG00000058091		ENSG00000049768		ENSG00000229945
ENSG00000049860	ENSG00000087085	ENSG00000057704	ENSG00000058262		ENSG00000049860		ENSG00000230055
ENSG00000050030	ENSG00000087087	ENSG00000057757	ENSG00000058272		ENSG00000050030		ENSG00000230078
ENSG00000050130	ENSG00000087095	ENSG00000057935	ENSG00000058404		ENSG00000050130		ENSG00000230094
ENSG00000050327	ENSG00000087191	ENSG00000058056	ENSG00000058453		ENSG00000050327		ENSG00000230374
ENSG00000050438	ENSG00000087258	ENSG00000058262	ENSG00000058600		ENSG00000050438		ENSG00000230462
ENSG00000050555	ENSG00000087263	ENSG00000058272	ENSG00000058668		ENSG00000050555		ENSG00000230567
ENSG00000050748	ENSG00000087269	ENSG00000058404	ENSG00000058729		ENSG00000050748		ENSG00000230591
ENSG00000051009	ENSG00000087274	ENSG00000058453	ENSG00000058799		ENSG00000051009		ENSG00000230762
ENSG00000051108	ENSG00000087299	ENSG00000058600	ENSG00000058866		ENSG00000051108		ENSG00000230883
ENSG00000051341	ENSG00000087338	ENSG00000058668	ENSG00000059145		ENSG00000051341		ENSG00000230938
ENSG00000051596	ENSG00000087365	ENSG00000058729	ENSG00000059573		ENSG00000051596		ENSG00000230974
ENSG00000052749	ENSG00000087460	ENSG00000058799	ENSG00000059691		ENSG00000052749		ENSG00000231042
ENSG00000052795	ENSG00000087470	ENSG00000058804	ENSG00000059758		ENSG00000052795		ENSG00000231223
ENSG00000052841	ENSG00000087495	ENSG00000058866	ENSG00000059769		ENSG00000052841		ENSG00000231400
ENSG00000053372	ENSG00000087586	ENSG00000059377	ENSG00000059804		ENSG00000053372		ENSG00000231452
ENSG00000053501	ENSG00000087903	ENSG00000059573	ENSG00000059915		ENSG00000053501		ENSG00000231497
ENSG00000053524	ENSG00000088035	ENSG00000059588	ENSG00000060069		ENSG00000053524		ENSG00000231520
ENSG00000053747	ENSG00000088179	ENSG00000059691	ENSG00000060138		ENSG00000053747		ENSG00000231673
ENSG00000053918	ENSG00000088298	ENSG00000059758	ENSG00000060237		ENSG00000053918		ENSG00000231687
ENSG00000054116	ENSG00000088833	ENSG00000059769	ENSG00000060339		ENSG00000054116		ENSG00000231751
ENSG00000054179	ENSG00000088836	ENSG00000059804	ENSG00000060642		ENSG00000054179		ENSG00000231844
ENSG00000054219	ENSG00000088930	ENSG00000059915	ENSG00000060688		ENSG00000054219		ENSG00000231972
ENSG00000054267	ENSG00000089009	ENSG00000060069	ENSG00000060709		ENSG00000054267		ENSG00000232038
ENSG00000054356	ENSG00000089060	ENSG00000060138	ENSG00000060718		ENSG00000054356		ENSG00000232055
ENSG00000054392	ENSG00000089159	ENSG00000060237	ENSG00000060762		ENSG00000054392		ENSG00000232171
ENSG00000054523	ENSG00000089163	ENSG00000060303	ENSG00000060982		ENSG00000054523		ENSG00000232297
ENSG00000054611	ENSG00000089169	ENSG00000060339	ENSG00000061273		ENSG00000054611		ENSG00000232313
ENSG00000054654	ENSG00000089195	ENSG00000060642	ENSG00000061676		ENSG00000054654		ENSG00000232329
ENSG00000054690	ENSG00000089234	ENSG00000060656	ENSG00000061794		ENSG00000054690		ENSG00000232371
ENSG00000054793	ENSG00000089289	ENSG00000060688	ENSG00000061918		ENSG00000054793		ENSG00000232417
ENSG00000054796	ENSG00000089737	ENSG00000060709	ENSG00000061936		ENSG00000054796		ENSG00000232427
ENSG00000054983	ENSG00000090054	ENSG00000060982	ENSG00000061938		ENSG00000054983		ENSG00000232449
ENSG00000055044	ENSG00000090060	ENSG00000061676	ENSG00000061987		ENSG00000055044		ENSG00000232478
ENSG00000055118	ENSG00000090097	ENSG00000061794	ENSG00000062096		ENSG00000055118		ENSG00000232657
ENSG00000055130	ENSG00000090273	ENSG00000061936	ENSG00000062282		ENSG00000055130		ENSG00000232840
ENSG00000055163	ENSG00000090520	ENSG00000061938	ENSG00000062370		ENSG00000055163		ENSG00000232856
ENSG00000055332	ENSG00000090621	ENSG00000061987	ENSG00000062485		ENSG00000055332		ENSG00000232961
ENSG00000055483	ENSG00000090857	ENSG00000062096	ENSG00000062524		ENSG00000055483		ENSG00000233000
ENSG00000055609	ENSG00000090863	ENSG00000062282	ENSG00000062582		ENSG00000055609		ENSG00000233094
ENSG00000055732	ENSG00000090889	ENSG00000062485	ENSG00000062598		ENSG00000055732		ENSG00000233112
ENSG00000055813	ENSG00000090989	ENSG00000062524	ENSG00000062650		ENSG00000055813		ENSG00000233166
ENSG00000055917	ENSG00000091010	ENSG00000062582	ENSG00000062716		ENSG00000055917		ENSG00000233224
ENSG00000055950	ENSG00000091039	ENSG00000062598	ENSG00000062822		ENSG00000055950		ENSG00000233281
ENSG00000056097	ENSG00000091129	ENSG00000062650	ENSG00000063176		ENSG00000056097		ENSG00000233443
ENSG00000056277	ENSG00000091157	ENSG00000062716	ENSG00000063177		ENSG00000056277		ENSG00000233556
ENSG00000056291	ENSG00000091164	ENSG00000062822	ENSG00000063241		ENSG00000056291		ENSG00000233897
ENSG00000056558	ENSG00000091428	ENSG00000063176	ENSG00000063244		ENSG00000056558		ENSG00000234029
ENSG00000056586	ENSG00000091483	ENSG00000063177	ENSG00000063245		ENSG00000056586		ENSG00000234298
ENSG00000056661	ENSG00000092054	ENSG00000063180	ENSG00000063601		ENSG00000056661		ENSG00000234341
ENSG00000056998	ENSG00000092094	ENSG00000063244	ENSG00000063761		ENSG00000056998		ENSG00000234412
ENSG00000057252	ENSG00000092108	ENSG00000063245	ENSG00000063854		ENSG00000057252		ENSG00000234563
ENSG00000057294	ENSG00000092201	ENSG00000063601	ENSG00000064102		ENSG00000057294		ENSG00000234733
ENSG00000057468	ENSG00000092621	ENSG00000063660	ENSG00000064270		ENSG00000057468		ENSG00000234972
ENSG00000057608	ENSG00000092853	ENSG00000063761	ENSG00000064313		ENSG00000057608		ENSG00000235048
ENSG00000057657	ENSG00000092931	ENSG00000063854	ENSG00000064393		ENSG00000057657		ENSG00000235187
ENSG00000057663	ENSG00000093009	ENSG00000064012	ENSG00000064419		ENSG00000057663		ENSG00000235210
ENSG00000057704	ENSG00000093144	ENSG00000064102	ENSG00000064601		ENSG00000057704		ENSG00000235320
ENSG00000057757	ENSG00000093217	ENSG00000064195	ENSG00000064651		ENSG00000057757		ENSG00000235406
ENSG00000057935	ENSG00000094804	ENSG00000064199	ENSG00000064655		ENSG00000057935		ENSG00000235418
ENSG00000058056	ENSG00000094841	ENSG00000064218	ENSG00000064687		ENSG00000058056		ENSG00000235796
ENSG00000058085	ENSG00000095321	ENSG00000064270	ENSG00000064703		ENSG00000058085		ENSG00000235973
ENSG00000058091	ENSG00000095485	ENSG00000064313	ENSG00000064726		ENSG00000058091		ENSG00000236000
ENSG00000058262	ENSG00000095794	ENSG00000064419	ENSG00000064763		ENSG00000058262		ENSG00000236139
ENSG00000058335	ENSG00000096063	ENSG00000064545	ENSG00000064995		ENSG00000058335		ENSG00000236186
ENSG00000058404	ENSG00000096384	ENSG00000064601	ENSG00000064999		ENSG00000058404		ENSG00000236421
ENSG00000058453	ENSG00000096401	ENSG00000064651	ENSG00000065000		ENSG00000058453		ENSG00000236553
ENSG00000058600	ENSG00000096717	ENSG00000064655	ENSG00000065057		ENSG00000058600		ENSG00000237029
ENSG00000058668	ENSG00000096872	ENSG00000064687	ENSG00000065060		ENSG00000058668		ENSG00000237134
ENSG00000058729	ENSG00000099139	ENSG00000064726	ENSG00000065135		ENSG00000058729		ENSG00000237355
ENSG00000058799	ENSG00000099204	ENSG00000064763	ENSG00000065150		ENSG00000058799		ENSG00000237375
ENSG00000058804	ENSG00000099219	ENSG00000064886	ENSG00000065154		ENSG00000058804		ENSG00000237486
ENSG00000058866	ENSG00000099246	ENSG00000064932	ENSG00000065183		ENSG00000058866		ENSG00000237565
ENSG00000059145	ENSG00000099341	ENSG00000064961	ENSG00000065243		ENSG00000059145		ENSG00000237817
ENSG00000059377	ENSG00000099381	ENSG00000064989	ENSG00000065268		ENSG00000059377		ENSG00000238014
ENSG00000059573	ENSG00000099624	ENSG00000064995	ENSG00000065320		ENSG00000059573		ENSG00000238023
ENSG00000059588	ENSG00000099795	ENSG00000064999	ENSG00000065328		ENSG00000059588		ENSG00000238155
ENSG00000059691	ENSG00000099797	ENSG00000065000	ENSG00000065357		ENSG00000059691		ENSG00000238159
ENSG00000059728	ENSG00000099810	ENSG00000065057	ENSG00000065361		ENSG00000059728		ENSG00000238163
ENSG00000059758	ENSG00000099817	ENSG00000065060	ENSG00000065413		ENSG00000059758		ENSG00000238209
ENSG00000059769	ENSG00000099899	ENSG00000065150	ENSG00000065427		ENSG00000059769		ENSG00000239331
ENSG00000059804	ENSG00000099992	ENSG00000065154	ENSG00000065491		ENSG00000059804		ENSG00000239730
ENSG00000059915	ENSG00000099994	ENSG00000065183	ENSG00000065548		ENSG00000059915		ENSG00000240120
ENSG00000060069	ENSG00000099995	ENSG00000065243	ENSG00000065559		ENSG00000060069		ENSG00000240263
ENSG00000060138	ENSG00000100003	ENSG00000065268	ENSG00000065609		ENSG00000060138		ENSG00000240428
ENSG00000060303	ENSG00000100023	ENSG00000065308	ENSG00000065613		ENSG00000060303		ENSG00000240897
ENSG00000060339	ENSG00000100028	ENSG00000065320	ENSG00000065615		ENSG00000060339		ENSG00000241488
ENSG00000060566	ENSG00000100029	ENSG00000065325	ENSG00000065665		ENSG00000060566		ENSG00000241519
ENSG00000060642	ENSG00000100030	ENSG00000065328	ENSG00000065675		ENSG00000060642		ENSG00000241579
ENSG00000060656	ENSG00000100033	ENSG00000065357	ENSG00000065717		ENSG00000060656		ENSG00000242131
ENSG00000060688	ENSG00000100034	ENSG00000065413	ENSG00000065833		ENSG00000060688		ENSG00000242185
ENSG00000060709	ENSG00000100038	ENSG00000065427	ENSG00000065883		ENSG00000060709		ENSG00000242204
ENSG00000060762	ENSG00000100077	ENSG00000065485	ENSG00000065911		ENSG00000060762		ENSG00000242284
ENSG00000060982	ENSG00000100109	ENSG00000065518	ENSG00000065923		ENSG00000060982		ENSG00000242384
ENSG00000061273	ENSG00000100116	ENSG00000065526	ENSG00000065978		ENSG00000061273		ENSG00000243668
ENSG00000061455	ENSG00000100129	ENSG00000065548	ENSG00000065989		ENSG00000061455		ENSG00000243924
ENSG00000061492	ENSG00000100138	ENSG00000065559	ENSG00000066027		ENSG00000061492		ENSG00000244102
ENSG00000061656	ENSG00000100142	ENSG00000065609	ENSG00000066032		ENSG00000061656		ENSG00000248833
ENSG00000061676	ENSG00000100151	ENSG00000065615	ENSG00000066084		ENSG00000061676		ENSG00000250588
ENSG00000061794	ENSG00000100220	ENSG00000065621	ENSG00000066117		ENSG00000061794		ENSG00000257437
ENSG00000061936	ENSG00000100226	ENSG00000065665	ENSG00000066135		ENSG00000061936		ENSG00000257793
ENSG00000061987	ENSG00000100258	ENSG00000065675	ENSG00000066136		ENSG00000061987		ENSG00000259880
ENSG00000062096	ENSG00000100266	ENSG00000065717	ENSG00000066230		ENSG00000062096		ENSG00000259938
ENSG00000062282	ENSG00000100280	ENSG00000065833	ENSG00000066248		ENSG00000062282		ENSG00000260045
ENSG00000062485	ENSG00000100284	ENSG00000065883	ENSG00000066379		ENSG00000062485		ENSG00000260178
ENSG00000062524	ENSG00000100288	ENSG00000065911	ENSG00000066382		ENSG00000062524		ENSG00000260181
ENSG00000062582	ENSG00000100294	ENSG00000065923	ENSG00000066427		ENSG00000062582		ENSG00000260245
ENSG00000062598	ENSG00000100297	ENSG00000065970	ENSG00000066455		ENSG00000062598		ENSG00000260313
ENSG00000062650	ENSG00000100304	ENSG00000065978	ENSG00000066468		ENSG00000062650		ENSG00000260463
ENSG00000062716	ENSG00000100316	ENSG00000065989	ENSG00000066583		ENSG00000062716		ENSG00000260485
ENSG00000062822	ENSG00000100321	ENSG00000066027	ENSG00000066629		ENSG00000062822		ENSG00000260692
ENSG00000063176	ENSG00000100347	ENSG00000066032	ENSG00000066651		ENSG00000063176		ENSG00000260968
ENSG00000063177	ENSG00000100348	ENSG00000066044	ENSG00000066654		ENSG00000063177		ENSG00000261023
ENSG00000063180	ENSG00000100353	ENSG00000066084	ENSG00000066739		ENSG00000063180		ENSG00000261230
ENSG00000063241	ENSG00000100359	ENSG00000066117	ENSG00000066777		ENSG00000063241		ENSG00000261283
ENSG00000063244	ENSG00000100393	ENSG00000066135	ENSG00000066923		ENSG00000063244		ENSG00000261306
ENSG00000063515	ENSG00000100395	ENSG00000066230	ENSG00000066933		ENSG00000063515		ENSG00000261657
ENSG00000063601	ENSG00000100410	ENSG00000066379	ENSG00000067048		ENSG00000063601		ENSG00000261899
ENSG00000063660	ENSG00000100412	ENSG00000066382	ENSG00000067057		ENSG00000063660		ENSG00000261910
ENSG00000063761	ENSG00000100413	ENSG00000066427	ENSG00000067064		ENSG00000063761		ENSG00000261911
ENSG00000063854	ENSG00000100416	ENSG00000066455	ENSG00000067113		ENSG00000063854		ENSG00000261974
ENSG00000064042	ENSG00000100422	ENSG00000066468	ENSG00000067141		ENSG00000064042		ENSG00000262057
ENSG00000064102	ENSG00000100439	ENSG00000066583	ENSG00000067167		ENSG00000064102		ENSG00000262088
ENSG00000064218	ENSG00000100483	ENSG00000066629	ENSG00000067177		ENSG00000064218		ENSG00000262169
ENSG00000064270	ENSG00000100490	ENSG00000066651	ENSG00000067191		ENSG00000064270		ENSG00000262359
ENSG00000064309	ENSG00000100519	ENSG00000066654	ENSG00000067208		ENSG00000064309		ENSG00000262464
ENSG00000064313	ENSG00000100522	ENSG00000066739	ENSG00000067221		ENSG00000064313		ENSG00000262489
ENSG00000064393	ENSG00000100523	ENSG00000066777	ENSG00000067248		ENSG00000064393		ENSG00000262569
ENSG00000064419	ENSG00000100554	ENSG00000066923	ENSG00000067334		ENSG00000064419		ENSG00000262589
ENSG00000064489	ENSG00000100567	ENSG00000066933	ENSG00000067533		ENSG00000064489		ENSG00000262595
ENSG00000064545	ENSG00000100577	ENSG00000067048	ENSG00000067560		ENSG00000064545		ENSG00000262676
ENSG00000064601	ENSG00000100591	ENSG00000067057	ENSG00000067596		ENSG00000064601		ENSG00000262742
ENSG00000064651	ENSG00000100596	ENSG00000067064	ENSG00000067606		ENSG00000064651		ENSG00000262773
ENSG00000064655	ENSG00000100600	ENSG00000067141	ENSG00000067704		ENSG00000064655		ENSG00000262782
ENSG00000064666	ENSG00000100601	ENSG00000067167	ENSG00000067715		ENSG00000064666		ENSG00000262812
ENSG00000064687	ENSG00000100603	ENSG00000067177	ENSG00000067798		ENSG00000064687		ENSG00000262841
ENSG00000064703	ENSG00000100664	ENSG00000067221	ENSG00000067829		ENSG00000064703		ENSG00000262847
ENSG00000064726	ENSG00000100678	ENSG00000067225	ENSG00000067836		ENSG00000064726		ENSG00000262875
ENSG00000064763	ENSG00000100697	ENSG00000067369	ENSG00000067840		ENSG00000064763		ENSG00000262947
ENSG00000064932	ENSG00000100714	ENSG00000067533	ENSG00000067842		ENSG00000064932		ENSG00000263005
ENSG00000064933	ENSG00000100731	ENSG00000067560	ENSG00000067900		ENSG00000064933		ENSG00000263008
ENSG00000064961	ENSG00000100749	ENSG00000067596	ENSG00000067992		ENSG00000064961		ENSG00000263024
ENSG00000064989	ENSG00000100764	ENSG00000067606	ENSG00000068024		ENSG00000064989		ENSG00000263077
ENSG00000064995	ENSG00000100784	ENSG00000067704	ENSG00000068028		ENSG00000064995		ENSG00000263138
ENSG00000064999	ENSG00000100796	ENSG00000067715	ENSG00000068078		ENSG00000064999		ENSG00000263148
ENSG00000065000	ENSG00000100804	ENSG00000067798	ENSG00000068120		ENSG00000065000		ENSG00000263185
ENSG00000065057	ENSG00000100813	ENSG00000067829	ENSG00000068308		ENSG00000065057		ENSG00000263334
ENSG00000065060	ENSG00000100823	ENSG00000067836	ENSG00000068366		ENSG00000065060		ENSG00000263521
ENSG00000065150	ENSG00000100836	ENSG00000067842	ENSG00000068383		ENSG00000065150		ENSG00000263965
ENSG00000065154	ENSG00000100883	ENSG00000067900	ENSG00000068394		ENSG00000065154		ENSG00000264082
ENSG00000065183	ENSG00000100889	ENSG00000067992	ENSG00000068438		ENSG00000065183		ENSG00000264806
ENSG00000065268	ENSG00000100902	ENSG00000068001	ENSG00000068650		ENSG00000065268		ENSG00000265346
ENSG00000065308	ENSG00000100934	ENSG00000068024	ENSG00000068654		ENSG00000065308		ENSG00000266198
ENSG00000065320	ENSG00000100941	ENSG00000068028	ENSG00000068724		ENSG00000065320		ENSG00000266748
ENSG00000065328	ENSG00000100949	ENSG00000068078	ENSG00000068784		ENSG00000065328		ENSG00000267229
ENSG00000065357	ENSG00000100997	ENSG00000068120	ENSG00000068793		ENSG00000065357		ENSG00000267556
ENSG00000065361	ENSG00000101003	ENSG00000068305	ENSG00000068796		ENSG00000065361		ENSG00000267619
ENSG00000065427	ENSG00000101052	ENSG00000068308	ENSG00000068831		ENSG00000065427		ENSG00000267807
ENSG00000065457	ENSG00000101076	ENSG00000068354	ENSG00000068878		ENSG00000065457		ENSG00000267823
ENSG00000065491	ENSG00000101079	ENSG00000068366	ENSG00000068912		ENSG00000065491		ENSG00000267946
ENSG00000065526	ENSG00000101084	ENSG00000068383	ENSG00000068971		ENSG00000065526		ENSG00000267977
ENSG00000065534	ENSG00000101138	ENSG00000068394	ENSG00000068976		ENSG00000065534		ENSG00000268021
ENSG00000065548	ENSG00000101152	ENSG00000068400	ENSG00000069020		ENSG00000065548		ENSG00000268188
ENSG00000065559	ENSG00000101160	ENSG00000068438	ENSG00000069188		ENSG00000065559		ENSG00000268226
ENSG00000065609	ENSG00000101166	ENSG00000068615	ENSG00000069329		ENSG00000065609		ENSG00000268359
ENSG00000065613	ENSG00000101181	ENSG00000068654	ENSG00000069345		ENSG00000065613		ENSG00000268440
ENSG00000065615	ENSG00000101187	ENSG00000068724	ENSG00000069431		ENSG00000065615		ENSG00000268569
ENSG00000065621	ENSG00000101199	ENSG00000068745	ENSG00000069509		ENSG00000065621		ENSG00000268612
ENSG00000065665	ENSG00000101246	ENSG00000068781	ENSG00000069764		ENSG00000065665		ENSG00000268630
ENSG00000065675	ENSG00000101247	ENSG00000068784	ENSG00000069869		ENSG00000065675		ENSG00000268675
ENSG00000065717	ENSG00000101266	ENSG00000068793	ENSG00000069943		ENSG00000065717		ENSG00000268680
ENSG00000065833	ENSG00000101276	ENSG00000068796	ENSG00000069966		ENSG00000065833		ENSG00000268690
ENSG00000065883	ENSG00000101294	ENSG00000068831	ENSG00000069974		ENSG00000065883		ENSG00000268768
ENSG00000065923	ENSG00000101323	ENSG00000068878	ENSG00000069998		ENSG00000065923		ENSG00000268778
ENSG00000065970	ENSG00000101333	ENSG00000068885	ENSG00000070010		ENSG00000065970		ENSG00000268815
ENSG00000065978	ENSG00000101335	ENSG00000068912	ENSG00000070018		ENSG00000065978		ENSG00000268904
ENSG00000065989	ENSG00000101337	ENSG00000068971	ENSG00000070061		ENSG00000065989		ENSG00000268928
ENSG00000066027	ENSG00000101343	ENSG00000068976	ENSG00000070081		ENSG00000066027		ENSG00000268946
ENSG00000066032	ENSG00000101346	ENSG00000069011	ENSG00000070159		ENSG00000066032		ENSG00000268963
ENSG00000066044	ENSG00000101349	ENSG00000069020	ENSG00000070182		ENSG00000066044		ENSG00000268980
ENSG00000066056	ENSG00000101350	ENSG00000069188	ENSG00000070214		ENSG00000066056		ENSG00000269031
ENSG00000066084	ENSG00000101361	ENSG00000069248	ENSG00000070366		ENSG00000066084		ENSG00000269056
ENSG00000066117	ENSG00000101391	ENSG00000069329	ENSG00000070367		ENSG00000066117		ENSG00000269075
ENSG00000066135	ENSG00000101417	ENSG00000069345	ENSG00000070423		ENSG00000066135		ENSG00000269079
ENSG00000066136	ENSG00000101421	ENSG00000069509	ENSG00000070495		ENSG00000066136		ENSG00000269115
ENSG00000066230	ENSG00000101438	ENSG00000069667	ENSG00000070540		ENSG00000066230		ENSG00000269382
ENSG00000066248	ENSG00000101452	ENSG00000069849	ENSG00000070610		ENSG00000066248		ENSG00000269384
ENSG00000066279	ENSG00000101460	ENSG00000069869	ENSG00000070614		ENSG00000066279		ENSG00000269395
ENSG00000066379	ENSG00000101464	ENSG00000069943	ENSG00000070669		ENSG00000066379		ENSG00000269595
ENSG00000066382	ENSG00000101473	ENSG00000069966	ENSG00000070718		ENSG00000066382		ENSG00000269612
ENSG00000066427	ENSG00000101474	ENSG00000069974	ENSG00000070729		ENSG00000066427		ENSG00000269645
ENSG00000066455	ENSG00000101489	ENSG00000069998	ENSG00000070748		ENSG00000066455		ENSG00000269666
ENSG00000066557	ENSG00000101557	ENSG00000070010	ENSG00000070756		ENSG00000066557		ENSG00000269797
ENSG00000066629	ENSG00000101654	ENSG00000070061	ENSG00000070761		ENSG00000066629		ENSG00000269875
ENSG00000066651	ENSG00000101844	ENSG00000070081	ENSG00000070770		ENSG00000066651
ENSG00000066654	ENSG00000101856	ENSG00000070159	ENSG00000070785		ENSG00000066654
ENSG00000066735	ENSG00000101868	ENSG00000070182	ENSG00000070808		ENSG00000066735
ENSG00000066777	ENSG00000101882	ENSG00000070366	ENSG00000070831		ENSG00000066777
ENSG00000066827	ENSG00000101928	ENSG00000070367	ENSG00000070882		ENSG00000066827
ENSG00000066923	ENSG00000101935	ENSG00000070371	ENSG00000070886		ENSG00000066923
ENSG00000066933	ENSG00000101972	ENSG00000070423	ENSG00000070915		ENSG00000066933
ENSG00000067057	ENSG00000102030	ENSG00000070495	ENSG00000070961		ENSG00000067057
ENSG00000067064	ENSG00000102038	ENSG00000070540	ENSG00000071051		ENSG00000067064
ENSG00000067082	ENSG00000102043	ENSG00000070601	ENSG00000071054		ENSG00000067082
ENSG00000067113	ENSG00000102189	ENSG00000070610	ENSG00000071082		ENSG00000067113
ENSG00000067141	ENSG00000102452	ENSG00000070614	ENSG00000071127		ENSG00000067141
ENSG00000067167	ENSG00000102575	ENSG00000070669	ENSG00000071189		ENSG00000067167
ENSG00000067177	ENSG00000102580	ENSG00000070718	ENSG00000071205		ENSG00000067177
ENSG00000067191	ENSG00000102606	ENSG00000070729	ENSG00000071242		ENSG00000067191
ENSG00000067208	ENSG00000102743	ENSG00000070748	ENSG00000071243		ENSG00000067208
ENSG00000067221	ENSG00000102755	ENSG00000070756	ENSG00000071462		ENSG00000067221
ENSG00000067225	ENSG00000102763	ENSG00000070761	ENSG00000071537		ENSG00000067225
ENSG00000067248	ENSG00000102898	ENSG00000070785	ENSG00000071539		ENSG00000067248
ENSG00000067334	ENSG00000102900	ENSG00000070808	ENSG00000071564		ENSG00000067334
ENSG00000067533	ENSG00000102967	ENSG00000070831	ENSG00000071626		ENSG00000067533
ENSG00000067560	ENSG00000102978	ENSG00000070886	ENSG00000071794		ENSG00000067560
ENSG00000067596	ENSG00000103035	ENSG00000070915	ENSG00000071859		ENSG00000067596
ENSG00000067606	ENSG00000103043	ENSG00000070961	ENSG00000071894		ENSG00000067606
ENSG00000067704	ENSG00000103051	ENSG00000071051	ENSG00000071967		ENSG00000067704
ENSG00000067715	ENSG00000103064	ENSG00000071054	ENSG00000071994		ENSG00000067715
ENSG00000067798	ENSG00000103066	ENSG00000071082	ENSG00000072042		ENSG00000067798
ENSG00000067829	ENSG00000103067	ENSG00000071127	ENSG00000072062		ENSG00000067829
ENSG00000067836	ENSG00000103089	ENSG00000071205	ENSG00000072071		ENSG00000067836
ENSG00000067840	ENSG00000103148	ENSG00000071242	ENSG00000072110		ENSG00000067840
ENSG00000067842	ENSG00000103150	ENSG00000071243	ENSG00000072133		ENSG00000067842
ENSG00000067900	ENSG00000103222	ENSG00000071282	ENSG00000072134		ENSG00000067900
ENSG00000067992	ENSG00000103249	ENSG00000071462	ENSG00000072135		ENSG00000067992
ENSG00000068001	ENSG00000103266	ENSG00000071537	ENSG00000072163		ENSG00000068001
ENSG00000068024	ENSG00000103274	ENSG00000071539	ENSG00000072195		ENSG00000068024
ENSG00000068028	ENSG00000103319	ENSG00000071564	ENSG00000072210		ENSG00000068028
ENSG00000068120	ENSG00000103335	ENSG00000071655	ENSG00000072310		ENSG00000068120
ENSG00000068305	ENSG00000103351	ENSG00000071859	ENSG00000072315		ENSG00000068305
ENSG00000068308	ENSG00000103355	ENSG00000071894	ENSG00000072401		ENSG00000068308
ENSG00000068323	ENSG00000103365	ENSG00000071967	ENSG00000072415		ENSG00000068323
ENSG00000068366	ENSG00000103375	ENSG00000071994	ENSG00000072501		ENSG00000068366
ENSG00000068383	ENSG00000103423	ENSG00000072042	ENSG00000072506		ENSG00000068383
ENSG00000068394	ENSG00000103479	ENSG00000072062	ENSG00000072518		ENSG00000068394
ENSG00000068438	ENSG00000103502	ENSG00000072071	ENSG00000072682		ENSG00000068438
ENSG00000068615	ENSG00000103510	ENSG00000072110	ENSG00000072756		ENSG00000068615
ENSG00000068654	ENSG00000103544	ENSG00000072133	ENSG00000072778		ENSG00000068654
ENSG00000068724	ENSG00000103546	ENSG00000072163	ENSG00000072786		ENSG00000068724
ENSG00000068745	ENSG00000103569	ENSG00000072210	ENSG00000072803		ENSG00000068745
ENSG00000068781	ENSG00000103642	ENSG00000072310	ENSG00000072818		ENSG00000068781
ENSG00000068784	ENSG00000103653	ENSG00000072315	ENSG00000072832		ENSG00000068784
ENSG00000068793	ENSG00000103671	ENSG00000072415	ENSG00000072849		ENSG00000068793
ENSG00000068796	ENSG00000103710	ENSG00000072501	ENSG00000072858		ENSG00000068796
ENSG00000068831	ENSG00000103723	ENSG00000072506	ENSG00000072864		ENSG00000068831
ENSG00000068878	ENSG00000103769	ENSG00000072518	ENSG00000072954		ENSG00000068878
ENSG00000068885	ENSG00000104067	ENSG00000072682	ENSG00000072958		ENSG00000068885
ENSG00000068912	ENSG00000104093	ENSG00000072756	ENSG00000073060		ENSG00000068912
ENSG00000068971	ENSG00000104129	ENSG00000072778	ENSG00000073111		ENSG00000068971
ENSG00000068976	ENSG00000104177	ENSG00000072786	ENSG00000073417		ENSG00000068976
ENSG00000069011	ENSG00000104299	ENSG00000072803	ENSG00000073464		ENSG00000069011
ENSG00000069018	ENSG00000104321	ENSG00000072818	ENSG00000073536		ENSG00000069018
ENSG00000069020	ENSG00000104325	ENSG00000072832	ENSG00000073578		ENSG00000069020
ENSG00000069188	ENSG00000104331	ENSG00000072849	ENSG00000073584		ENSG00000069188
ENSG00000069248	ENSG00000104343	ENSG00000072858	ENSG00000073614		ENSG00000069248
ENSG00000069329	ENSG00000104375	ENSG00000072954	ENSG00000073670		ENSG00000069329
ENSG00000069345	ENSG00000104388	ENSG00000072958	ENSG00000073711		ENSG00000069345
ENSG00000069667	ENSG00000104408	ENSG00000073060	ENSG00000073712		ENSG00000069667
ENSG00000069764	ENSG00000104412	ENSG00000073067	ENSG00000073734		ENSG00000069764
ENSG00000069812	ENSG00000104517	ENSG00000073111	ENSG00000073792		ENSG00000069812
ENSG00000069849	ENSG00000104522	ENSG00000073417	ENSG00000073803		ENSG00000069849
ENSG00000069869	ENSG00000104524	ENSG00000073464	ENSG00000073910		ENSG00000069869
ENSG00000069943	ENSG00000104537	ENSG00000073536	ENSG00000073921		ENSG00000069943
ENSG00000069966	ENSG00000104626	ENSG00000073578	ENSG00000073969		ENSG00000069966
ENSG00000069974	ENSG00000104635	ENSG00000073584	ENSG00000074054		ENSG00000069974
ENSG00000069998	ENSG00000104643	ENSG00000073614	ENSG00000074181		ENSG00000069998
ENSG00000070010	ENSG00000104660	ENSG00000073712	ENSG00000074201		ENSG00000070010
ENSG00000070018	ENSG00000104695	ENSG00000073734	ENSG00000074211		ENSG00000070018
ENSG00000070061	ENSG00000104723	ENSG00000073737	ENSG00000074219		ENSG00000070061
ENSG00000070081	ENSG00000104738	ENSG00000073792	ENSG00000074319		ENSG00000070081
ENSG00000070159	ENSG00000104763	ENSG00000073803	ENSG00000074370		ENSG00000070159
ENSG00000070182	ENSG00000104774	ENSG00000073861	ENSG00000074582		ENSG00000070182
ENSG00000070366	ENSG00000104812	ENSG00000073921	ENSG00000074590		ENSG00000070366
ENSG00000070367	ENSG00000104823	ENSG00000073969	ENSG00000074603		ENSG00000070367
ENSG00000070371	ENSG00000104824	ENSG00000074054	ENSG00000074695		ENSG00000070371
ENSG00000070423	ENSG00000104852	ENSG00000074071	ENSG00000074696		ENSG00000070423
ENSG00000070495	ENSG00000104853	ENSG00000074181	ENSG00000074771		ENSG00000070495
ENSG00000070540	ENSG00000104859	ENSG00000074201	ENSG00000074800		ENSG00000070540
ENSG00000070601	ENSG00000104866	ENSG00000074211	ENSG00000074803		ENSG00000070601
ENSG00000070610	ENSG00000104884	ENSG00000074219	ENSG00000074855		ENSG00000070610
ENSG00000070614	ENSG00000104888	ENSG00000074266	ENSG00000075043		ENSG00000070614
ENSG00000070669	ENSG00000104889	ENSG00000074319	ENSG00000075089		ENSG00000070669
ENSG00000070718	ENSG00000104907	ENSG00000074370	ENSG00000075131		ENSG00000070718
ENSG00000070729	ENSG00000104957	ENSG00000074582	ENSG00000075151		ENSG00000070729
ENSG00000070748	ENSG00000104969	ENSG00000074603	ENSG00000075234		ENSG00000070748
ENSG00000070761	ENSG00000104980	ENSG00000074621	ENSG00000075239		ENSG00000070761
ENSG00000070770	ENSG00000105135	ENSG00000074695	ENSG00000075303		ENSG00000070770
ENSG00000070785	ENSG00000105173	ENSG00000074800	ENSG00000075336		ENSG00000070785
ENSG00000070808	ENSG00000105185	ENSG00000074803	ENSG00000075340		ENSG00000070808
ENSG00000070814	ENSG00000105193	ENSG00000074855	ENSG00000075391		ENSG00000070814
ENSG00000070831	ENSG00000105197	ENSG00000074964	ENSG00000075413		ENSG00000070831
ENSG00000070886	ENSG00000105202	ENSG00000075043	ENSG00000075415		ENSG00000070886
ENSG00000070915	ENSG00000105220	ENSG00000075073	ENSG00000075539		ENSG00000070915
ENSG00000070961	ENSG00000105223	ENSG00000075089	ENSG00000075568		ENSG00000070961
ENSG00000070985	ENSG00000105254	ENSG00000075131	ENSG00000075624		ENSG00000070985
ENSG00000071051	ENSG00000105258	ENSG00000075151	ENSG00000075643		ENSG00000071051
ENSG00000071054	ENSG00000105298	ENSG00000075234	ENSG00000075651		ENSG00000071054
ENSG00000071082	ENSG00000105325	ENSG00000075239	ENSG00000075673		ENSG00000071082
ENSG00000071127	ENSG00000105372	ENSG00000075240	ENSG00000075702		ENSG00000071127
ENSG00000071189	ENSG00000105373	ENSG00000075275	ENSG00000075711		ENSG00000071189
ENSG00000071205	ENSG00000105379	ENSG00000075303	ENSG00000075785		ENSG00000071205
ENSG00000071242	ENSG00000105401	ENSG00000075336	ENSG00000075790		ENSG00000071242
ENSG00000071243	ENSG00000105402	ENSG00000075340	ENSG00000075826		ENSG00000071243
ENSG00000071282	ENSG00000105409	ENSG00000075413	ENSG00000075856		ENSG00000071282
ENSG00000071462	ENSG00000105438	ENSG00000075415	ENSG00000075886		ENSG00000071462
ENSG00000071537	ENSG00000105447	ENSG00000075420	ENSG00000075891		ENSG00000071537
ENSG00000071539	ENSG00000105464	ENSG00000075429	ENSG00000075914		ENSG00000071539
ENSG00000071564	ENSG00000105486	ENSG00000075461	ENSG00000075945		ENSG00000071564
ENSG00000071575	ENSG00000105552	ENSG00000075539	ENSG00000075975		ENSG00000071575
ENSG00000071794	ENSG00000105568	ENSG00000075568	ENSG00000076003		ENSG00000071794
ENSG00000071859	ENSG00000105583	ENSG00000075624	ENSG00000076043		ENSG00000071859
ENSG00000071889	ENSG00000105607	ENSG00000075643	ENSG00000076053		ENSG00000071889
ENSG00000071894	ENSG00000105612	ENSG00000075651	ENSG00000076108		ENSG00000071894
ENSG00000071909	ENSG00000105640	ENSG00000075711	ENSG00000076201		ENSG00000071909
ENSG00000071967	ENSG00000105669	ENSG00000075785	ENSG00000076242		ENSG00000071967
ENSG00000071994	ENSG00000105677	ENSG00000075790	ENSG00000076248		ENSG00000071994
ENSG00000072062	ENSG00000105726	ENSG00000075826	ENSG00000076321		ENSG00000072062
ENSG00000072071	ENSG00000105778	ENSG00000075856	ENSG00000076351		ENSG00000072071
ENSG00000072133	ENSG00000105793	ENSG00000075886	ENSG00000076356		ENSG00000072133
ENSG00000072135	ENSG00000105810	ENSG00000075891	ENSG00000076513		ENSG00000072135
ENSG00000072163	ENSG00000105819	ENSG00000075914	ENSG00000076554		ENSG00000072163
ENSG00000072182	ENSG00000105821	ENSG00000075945	ENSG00000076555		ENSG00000072182
ENSG00000072201	ENSG00000105852	ENSG00000075975	ENSG00000076604		ENSG00000072201
ENSG00000072210	ENSG00000105865	ENSG00000076003	ENSG00000076650		ENSG00000072210
ENSG00000072310	ENSG00000105866	ENSG00000076043	ENSG00000076685		ENSG00000072310
ENSG00000072315	ENSG00000105880	ENSG00000076067	ENSG00000076716		ENSG00000072315
ENSG00000072415	ENSG00000105887	ENSG00000076108	ENSG00000076826		ENSG00000072415
ENSG00000072422	ENSG00000105948	ENSG00000076201	ENSG00000076864		ENSG00000072422
ENSG00000072501	ENSG00000105968	ENSG00000076242	ENSG00000076924		ENSG00000072501
ENSG00000072506	ENSG00000105972	ENSG00000076248	ENSG00000076944		ENSG00000072506
ENSG00000072518	ENSG00000105991	ENSG00000076258	ENSG00000076984		ENSG00000072518
ENSG00000072657	ENSG00000105993	ENSG00000076321	ENSG00000077044		ENSG00000072657
ENSG00000072682	ENSG00000106049	ENSG00000076351	ENSG00000077080		ENSG00000072682
ENSG00000072756	ENSG00000106069	ENSG00000076513	ENSG00000077092		ENSG00000072756
ENSG00000072778	ENSG00000106144	ENSG00000076554	ENSG00000077097		ENSG00000072778
ENSG00000072786	ENSG00000106153	ENSG00000076555	ENSG00000077147		ENSG00000072786
ENSG00000072803	ENSG00000106245	ENSG00000076604	ENSG00000077157		ENSG00000072803
ENSG00000072818	ENSG00000106263	ENSG00000076650	ENSG00000077232		ENSG00000072818
ENSG00000072849	ENSG00000106290	ENSG00000076685	ENSG00000077235		ENSG00000072849
ENSG00000072858	ENSG00000106299	ENSG00000076716	ENSG00000077264		ENSG00000072858
ENSG00000072864	ENSG00000106348	ENSG00000076770	ENSG00000077274		ENSG00000072864
ENSG00000072954	ENSG00000106355	ENSG00000076826	ENSG00000077312		ENSG00000072954
ENSG00000072958	ENSG00000106392	ENSG00000076864	ENSG00000077348		ENSG00000072958
ENSG00000073060	ENSG00000106397	ENSG00000076924	ENSG00000077380		ENSG00000073060
ENSG00000073111	ENSG00000106588	ENSG00000076944	ENSG00000077458		ENSG00000073111
ENSG00000073146	ENSG00000106615	ENSG00000076984	ENSG00000077463		ENSG00000073146
ENSG00000073331	ENSG00000106689	ENSG00000077009	ENSG00000077522		ENSG00000073331
ENSG00000073350	ENSG00000106771	ENSG00000077044	ENSG00000077549		ENSG00000073350
ENSG00000073417	ENSG00000106976	ENSG00000077080	ENSG00000077616		ENSG00000073417
ENSG00000073464	ENSG00000106992	ENSG00000077092	ENSG00000077684		ENSG00000073464
ENSG00000073536	ENSG00000107021	ENSG00000077097	ENSG00000077721		ENSG00000073536
ENSG00000073578	ENSG00000107036	ENSG00000077147	ENSG00000077782		ENSG00000073578
ENSG00000073584	ENSG00000107130	ENSG00000077157	ENSG00000077935		ENSG00000073584
ENSG00000073614	ENSG00000107147	ENSG00000077254	ENSG00000077942		ENSG00000073614
ENSG00000073670	ENSG00000107185	ENSG00000077264	ENSG00000077943		ENSG00000073670
ENSG00000073711	ENSG00000107201	ENSG00000077274	ENSG00000078043		ENSG00000073711
ENSG00000073712	ENSG00000107223	ENSG00000077279	ENSG00000078061		ENSG00000073712
ENSG00000073734	ENSG00000107341	ENSG00000077312	ENSG00000078070		ENSG00000073734
ENSG00000073737	ENSG00000107371	ENSG00000077348	ENSG00000078098		ENSG00000073737
ENSG00000073792	ENSG00000107372	ENSG00000077380	ENSG00000078140		ENSG00000073792
ENSG00000073803	ENSG00000107518	ENSG00000077420	ENSG00000078142		ENSG00000073803
ENSG00000073910	ENSG00000107537	ENSG00000077454	ENSG00000078246		ENSG00000073910
ENSG00000073921	ENSG00000107581	ENSG00000077458	ENSG00000078269		ENSG00000073921
ENSG00000073969	ENSG00000107611	ENSG00000077463	ENSG00000078295		ENSG00000073969
ENSG00000074047	ENSG00000107669	ENSG00000077498	ENSG00000078304		ENSG00000074047
ENSG00000074054	ENSG00000107779	ENSG00000077522	ENSG00000078328		ENSG00000074054
ENSG00000074201	ENSG00000107815	ENSG00000077549	ENSG00000078369		ENSG00000074201
ENSG00000074211	ENSG00000107819	ENSG00000077616	ENSG00000078403		ENSG00000074211
ENSG00000074219	ENSG00000107862	ENSG00000077684	ENSG00000078618		ENSG00000074219
ENSG00000074266	ENSG00000107902	ENSG00000077721	ENSG00000078668		ENSG00000074266
ENSG00000074276	ENSG00000107937	ENSG00000077782	ENSG00000078747		ENSG00000074276
ENSG00000074319	ENSG00000108039	ENSG00000077935	ENSG00000078795		ENSG00000074319
ENSG00000074370	ENSG00000108055	ENSG00000077942	ENSG00000078808		ENSG00000074370
ENSG00000074527	ENSG00000108061	ENSG00000077943	ENSG00000078814		ENSG00000074527
ENSG00000074582	ENSG00000108094	ENSG00000077984	ENSG00000078902		ENSG00000074582
ENSG00000074590	ENSG00000108187	ENSG00000078053	ENSG00000078967		ENSG00000074590
ENSG00000074603	ENSG00000108270	ENSG00000078061	ENSG00000079134		ENSG00000074603
ENSG00000074621	ENSG00000108294	ENSG00000078070	ENSG00000079156		ENSG00000074621
ENSG00000074695	ENSG00000108296	ENSG00000078098	ENSG00000079215		ENSG00000074695
ENSG00000074696	ENSG00000108298	ENSG00000078140	ENSG00000079246		ENSG00000074696
ENSG00000074706	ENSG00000108344	ENSG00000078142	ENSG00000079277		ENSG00000074706
ENSG00000074800	ENSG00000108424	ENSG00000078246	ENSG00000079308		ENSG00000074800
ENSG00000074803	ENSG00000108439	ENSG00000078269	ENSG00000079313		ENSG00000074803
ENSG00000074855	ENSG00000108443	ENSG00000078295	ENSG00000079332		ENSG00000074855
ENSG00000074935	ENSG00000108465	ENSG00000078304	ENSG00000079335		ENSG00000074935
ENSG00000075043	ENSG00000108469	ENSG00000078369	ENSG00000079337		ENSG00000075043
ENSG00000075073	ENSG00000108523	ENSG00000078403	ENSG00000079387		ENSG00000075073
ENSG00000075089	ENSG00000108528	ENSG00000078596	ENSG00000079435		ENSG00000075089
ENSG00000075131	ENSG00000108561	ENSG00000078668	ENSG00000079482		ENSG00000075131
ENSG00000075151	ENSG00000108588	ENSG00000078747	ENSG00000079691		ENSG00000075151
ENSG00000075234	ENSG00000108590	ENSG00000078795	ENSG00000079739		ENSG00000075234
ENSG00000075239	ENSG00000108591	ENSG00000078808	ENSG00000079785		ENSG00000075239
ENSG00000075240	ENSG00000108592	ENSG00000078814	ENSG00000079805		ENSG00000075240
ENSG00000075290	ENSG00000108599	ENSG00000078902	ENSG00000079819		ENSG00000075290
ENSG00000075303	ENSG00000108733	ENSG00000078967	ENSG00000079841		ENSG00000075303
ENSG00000075336	ENSG00000108829	ENSG00000079134	ENSG00000079931		ENSG00000075336
ENSG00000075340	ENSG00000108846	ENSG00000079150	ENSG00000079950		ENSG00000075340
ENSG00000075388	ENSG00000108848	ENSG00000079246	ENSG00000080007		ENSG00000075388
ENSG00000075391	ENSG00000108960	ENSG00000079277	ENSG00000080189		ENSG00000075391
ENSG00000075413	ENSG00000108984	ENSG00000079308	ENSG00000080224		ENSG00000075413
ENSG00000075415	ENSG00000109016	ENSG00000079313	ENSG00000080298		ENSG00000075415
ENSG00000075420	ENSG00000109062	ENSG00000079332	ENSG00000080371		ENSG00000075420
ENSG00000075426	ENSG00000109065	ENSG00000079335	ENSG00000080493		ENSG00000075426
ENSG00000075539	ENSG00000109066	ENSG00000079337	ENSG00000080503		ENSG00000075539
ENSG00000075568	ENSG00000109111	ENSG00000079435	ENSG00000080511		ENSG00000075568
ENSG00000075624	ENSG00000109133	ENSG00000079482	ENSG00000080546		ENSG00000075624
ENSG00000075643	ENSG00000109339	ENSG00000079691	ENSG00000080573		ENSG00000075643
ENSG00000075651	ENSG00000109436	ENSG00000079739	ENSG00000080603		ENSG00000075651
ENSG00000075702	ENSG00000109472	ENSG00000079782	ENSG00000080608		ENSG00000075702
ENSG00000075785	ENSG00000109475	ENSG00000079785	ENSG00000080618		ENSG00000075785
ENSG00000075790	ENSG00000109519	ENSG00000079805	ENSG00000080644		ENSG00000075790
ENSG00000075826	ENSG00000109534	ENSG00000079841	ENSG00000080709		ENSG00000075826
ENSG00000075856	ENSG00000109572	ENSG00000079950	ENSG00000080802		ENSG00000075856
ENSG00000075884	ENSG00000109586	ENSG00000080007	ENSG00000080815		ENSG00000075884
ENSG00000075891	ENSG00000109606	ENSG00000080166	ENSG00000080824		ENSG00000075891
ENSG00000075914	ENSG00000109618	ENSG00000080189	ENSG00000080839		ENSG00000075914
ENSG00000075945	ENSG00000109670	ENSG00000080224	ENSG00000080854		ENSG00000075945
ENSG00000075975	ENSG00000109686	ENSG00000080293	ENSG00000080986		ENSG00000075975
ENSG00000076003	ENSG00000109736	ENSG00000080298	ENSG00000081019		ENSG00000076003
ENSG00000076043	ENSG00000109756	ENSG00000080371	ENSG00000081026		ENSG00000076043
ENSG00000076053	ENSG00000109814	ENSG00000080503	ENSG00000081052		ENSG00000076053
ENSG00000076067	ENSG00000109854	ENSG00000080546	ENSG00000081087		ENSG00000076067
ENSG00000076108	ENSG00000109911	ENSG00000080603	ENSG00000081181		ENSG00000076108
ENSG00000076201	ENSG00000109917	ENSG00000080608	ENSG00000081189		ENSG00000076201
ENSG00000076242	ENSG00000109971	ENSG00000080644	ENSG00000081248		ENSG00000076242
ENSG00000076248	ENSG00000110047	ENSG00000080802	ENSG00000081307		ENSG00000076248
ENSG00000076258	ENSG00000110060	ENSG00000080815	ENSG00000081479		ENSG00000076258
ENSG00000076321	ENSG00000110063	ENSG00000080824	ENSG00000081665		ENSG00000076321
ENSG00000076351	ENSG00000110066	ENSG00000080839	ENSG00000081692		ENSG00000076351
ENSG00000076356	ENSG00000110074	ENSG00000080986	ENSG00000081721		ENSG00000076356
ENSG00000076513	ENSG00000110090	ENSG00000081019	ENSG00000081760		ENSG00000076513
ENSG00000076554	ENSG00000110104	ENSG00000081026	ENSG00000081803		ENSG00000076554
ENSG00000076555	ENSG00000110107	ENSG00000081059	ENSG00000081913		ENSG00000076555
ENSG00000076604	ENSG00000110172	ENSG00000081087	ENSG00000081923		ENSG00000076604
ENSG00000076650	ENSG00000110395	ENSG00000081181	ENSG00000082014		ENSG00000076650
ENSG00000076685	ENSG00000110436	ENSG00000081189	ENSG00000082068		ENSG00000076685
ENSG00000076716	ENSG00000110455	ENSG00000081248	ENSG00000082212		ENSG00000076716
ENSG00000076770	ENSG00000110514	ENSG00000081307	ENSG00000082258		ENSG00000076770
ENSG00000076826	ENSG00000110536	ENSG00000081377	ENSG00000082269		ENSG00000076826
ENSG00000076864	ENSG00000110583	ENSG00000081479	ENSG00000082293		ENSG00000076864
ENSG00000076924	ENSG00000110628	ENSG00000081692	ENSG00000082397		ENSG00000076924
ENSG00000076928	ENSG00000110700	ENSG00000081721	ENSG00000082458		ENSG00000076928
ENSG00000076944	ENSG00000110711	ENSG00000081760	ENSG00000082515		ENSG00000076944
ENSG00000076984	ENSG00000110717	ENSG00000081800	ENSG00000082701		ENSG00000076984
ENSG00000077044	ENSG00000110768	ENSG00000081803	ENSG00000082781		ENSG00000077044
ENSG00000077063	ENSG00000110871	ENSG00000081913	ENSG00000082805		ENSG00000077063
ENSG00000077080	ENSG00000110880	ENSG00000081923	ENSG00000082898		ENSG00000077080
ENSG00000077147	ENSG00000110906	ENSG00000082014	ENSG00000082996		ENSG00000077147
ENSG00000077232	ENSG00000110911	ENSG00000082126	ENSG00000083067		ENSG00000077232
ENSG00000077235	ENSG00000110917	ENSG00000082212	ENSG00000083097		ENSG00000077235
ENSG00000077264	ENSG00000110955	ENSG00000082258	ENSG00000083123		ENSG00000077264
ENSG00000077274	ENSG00000111110	ENSG00000082269	ENSG00000083223		ENSG00000077274
ENSG00000077312	ENSG00000111186	ENSG00000082293	ENSG00000083290		ENSG00000077312
ENSG00000077327	ENSG00000111229	ENSG00000082458	ENSG00000083307		ENSG00000077327
ENSG00000077348	ENSG00000111231	ENSG00000082512	ENSG00000083312		ENSG00000077348
ENSG00000077380	ENSG00000111237	ENSG00000082515	ENSG00000083444		ENSG00000077380
ENSG00000077420	ENSG00000111271	ENSG00000082556	ENSG00000083520		ENSG00000077420
ENSG00000077454	ENSG00000111275	ENSG00000082641	ENSG00000083544		ENSG00000077454
ENSG00000077458	ENSG00000111300	ENSG00000082701	ENSG00000083642		ENSG00000077458
ENSG00000077463	ENSG00000111361	ENSG00000082805	ENSG00000083720		ENSG00000077463
ENSG00000077522	ENSG00000111481	ENSG00000082996	ENSG00000083750		ENSG00000077522
ENSG00000077549	ENSG00000111530	ENSG00000083067	ENSG00000083799		ENSG00000077549
ENSG00000077616	ENSG00000111615	ENSG00000083097	ENSG00000083807		ENSG00000077616
ENSG00000077684	ENSG00000111640	ENSG00000083123	ENSG00000083817		ENSG00000077684
ENSG00000077721	ENSG00000111641	ENSG00000083223	ENSG00000083828		ENSG00000077721
ENSG00000077800	ENSG00000111642	ENSG00000083290	ENSG00000083845		ENSG00000077800
ENSG00000077935	ENSG00000111711	ENSG00000083307	ENSG00000083857		ENSG00000077935
ENSG00000077942	ENSG00000111737	ENSG00000083312	ENSG00000083937		ENSG00000077942
ENSG00000077943	ENSG00000111802	ENSG00000083444	ENSG00000084070		ENSG00000077943
ENSG00000078043	ENSG00000111816	ENSG00000083520	ENSG00000084072		ENSG00000078043
ENSG00000078053	ENSG00000111832	ENSG00000083544	ENSG00000084073		ENSG00000078053
ENSG00000078061	ENSG00000111837	ENSG00000083642	ENSG00000084090		ENSG00000078061
ENSG00000078070	ENSG00000111875	ENSG00000083720	ENSG00000084092		ENSG00000078070
ENSG00000078098	ENSG00000111879	ENSG00000083750	ENSG00000084110		ENSG00000078098
ENSG00000078114	ENSG00000111880	ENSG00000083799	ENSG00000084207		ENSG00000078114
ENSG00000078140	ENSG00000111885	ENSG00000083812	ENSG00000084234		ENSG00000078140
ENSG00000078142	ENSG00000111897	ENSG00000083828	ENSG00000084463		ENSG00000078142
ENSG00000078246	ENSG00000112031	ENSG00000083838	ENSG00000084623		ENSG00000078246
ENSG00000078269	ENSG00000112062	ENSG00000083842	ENSG00000084636		ENSG00000078269
ENSG00000078295	ENSG00000112077	ENSG00000083845	ENSG00000084652		ENSG00000078295
ENSG00000078304	ENSG00000112096	ENSG00000083857	ENSG00000084710		ENSG00000078304
ENSG00000078319	ENSG00000112175	ENSG00000083937	ENSG00000084731		ENSG00000078319
ENSG00000078328	ENSG00000112183	ENSG00000084070	ENSG00000084733		ENSG00000078328
ENSG00000078369	ENSG00000112208	ENSG00000084072	ENSG00000084754		ENSG00000078369
ENSG00000078399	ENSG00000112237	ENSG00000084073	ENSG00000084764		ENSG00000078399
ENSG00000078403	ENSG00000112245	ENSG00000084092	ENSG00000084774		ENSG00000078403
ENSG00000078579	ENSG00000112282	ENSG00000084110	ENSG00000085117		ENSG00000078579
ENSG00000078596	ENSG00000112294	ENSG00000084207	ENSG00000085224		ENSG00000078596
ENSG00000078668	ENSG00000112304	ENSG00000084234	ENSG00000085231		ENSG00000078668
ENSG00000078747	ENSG00000112305	ENSG00000084453	ENSG00000085276		ENSG00000078747
ENSG00000078795	ENSG00000112306	ENSG00000084623	ENSG00000085415		ENSG00000078795
ENSG00000078808	ENSG00000112333	ENSG00000084652	ENSG00000085433		ENSG00000078808
ENSG00000078902	ENSG00000112339	ENSG00000084710	ENSG00000085491		ENSG00000078902
ENSG00000079134	ENSG00000112367	ENSG00000084731	ENSG00000085511		ENSG00000079134
ENSG00000079215	ENSG00000112379	ENSG00000084733	ENSG00000085552		ENSG00000079215
ENSG00000079246	ENSG00000112419	ENSG00000084754	ENSG00000085563		ENSG00000079246
ENSG00000079277	ENSG00000112494	ENSG00000084764	ENSG00000085662		ENSG00000079277
ENSG00000079308	ENSG00000112531	ENSG00000084774	ENSG00000085719		ENSG00000079308
ENSG00000079313	ENSG00000112561	ENSG00000085117	ENSG00000085721		ENSG00000079313
ENSG00000079332	ENSG00000112562	ENSG00000085231	ENSG00000085760		ENSG00000079332
ENSG00000079335	ENSG00000112578	ENSG00000085274	ENSG00000085831		ENSG00000079335
ENSG00000079337	ENSG00000112592	ENSG00000085276	ENSG00000085832		ENSG00000079337
ENSG00000079387	ENSG00000112640	ENSG00000085365	ENSG00000085840		ENSG00000079387
ENSG00000079432	ENSG00000112664	ENSG00000085415	ENSG00000085872		ENSG00000079432
ENSG00000079435	ENSG00000112685	ENSG00000085449	ENSG00000085978		ENSG00000079435
ENSG00000079482	ENSG00000112699	ENSG00000085491	ENSG00000085998		ENSG00000079482
ENSG00000079691	ENSG00000112739	ENSG00000085511	ENSG00000085999		ENSG00000079691
ENSG00000079739	ENSG00000112893	ENSG00000085563	ENSG00000086015		ENSG00000079739
ENSG00000079785	ENSG00000112992	ENSG00000085644	ENSG00000086061		ENSG00000079785
ENSG00000079805	ENSG00000113013	ENSG00000085662	ENSG00000086062		ENSG00000079805
ENSG00000079841	ENSG00000113141	ENSG00000085719	ENSG00000086065		ENSG00000079841
ENSG00000079950	ENSG00000113161	ENSG00000085721	ENSG00000086102		ENSG00000079950
ENSG00000080007	ENSG00000113163	ENSG00000085760	ENSG00000086189		ENSG00000080007
ENSG00000080189	ENSG00000113282	ENSG00000085831	ENSG00000086205		ENSG00000080189
ENSG00000080298	ENSG00000113300	ENSG00000085832	ENSG00000086475		ENSG00000080298
ENSG00000080371	ENSG00000113312	ENSG00000085840	ENSG00000086504		ENSG00000080371
ENSG00000080493	ENSG00000113356	ENSG00000085872	ENSG00000086570		ENSG00000080493
ENSG00000080503	ENSG00000113360	ENSG00000085978	ENSG00000086589		ENSG00000080503
ENSG00000080546	ENSG00000113368	ENSG00000085999	ENSG00000086598		ENSG00000080546
ENSG00000080603	ENSG00000113384	ENSG00000086015	ENSG00000086619		ENSG00000080603
ENSG00000080608	ENSG00000113391	ENSG00000086061	ENSG00000086666		ENSG00000080608
ENSG00000080709	ENSG00000113448	ENSG00000086062	ENSG00000086712		ENSG00000080709
ENSG00000080802	ENSG00000113456	ENSG00000086065	ENSG00000086717		ENSG00000080802
ENSG00000080815	ENSG00000113460	ENSG00000086102	ENSG00000086758		ENSG00000080815
ENSG00000080824	ENSG00000113552	ENSG00000086189	ENSG00000086827		ENSG00000080824
ENSG00000080845	ENSG00000113569	ENSG00000086205	ENSG00000086848		ENSG00000080845
ENSG00000080986	ENSG00000113593	ENSG00000086475	ENSG00000087008		ENSG00000080986
ENSG00000081019	ENSG00000113595	ENSG00000086504	ENSG00000087053		ENSG00000081019
ENSG00000081026	ENSG00000113597	ENSG00000086544	ENSG00000087076		ENSG00000081026
ENSG00000081059	ENSG00000113649	ENSG00000086570	ENSG00000087085		ENSG00000081059
ENSG00000081087	ENSG00000113712	ENSG00000086589	ENSG00000087087		ENSG00000081087
ENSG00000081189	ENSG00000113719	ENSG00000086598	ENSG00000087095		ENSG00000081189
ENSG00000081237	ENSG00000113763	ENSG00000086619	ENSG00000087157		ENSG00000081237
ENSG00000081248	ENSG00000113924	ENSG00000086666	ENSG00000087191		ENSG00000081248
ENSG00000081277	ENSG00000113966	ENSG00000086712	ENSG00000087258		ENSG00000081277
ENSG00000081307	ENSG00000114054	ENSG00000086717	ENSG00000087263		ENSG00000081307
ENSG00000081377	ENSG00000114120	ENSG00000086758	ENSG00000087269		ENSG00000081377
ENSG00000081479	ENSG00000114125	ENSG00000086827	ENSG00000087274		ENSG00000081479
ENSG00000081692	ENSG00000114127	ENSG00000086848	ENSG00000087299		ENSG00000081692
ENSG00000081760	ENSG00000114166	ENSG00000087008	ENSG00000087302		ENSG00000081760
ENSG00000081800	ENSG00000114209	ENSG00000087053	ENSG00000087303		ENSG00000081800
ENSG00000081803	ENSG00000114331	ENSG00000087076	ENSG00000087338		ENSG00000081803
ENSG00000081913	ENSG00000114346	ENSG00000087077	ENSG00000087365		ENSG00000081913
ENSG00000082014	ENSG00000114354	ENSG00000087085	ENSG00000087460		ENSG00000082014
ENSG00000082068	ENSG00000114388	ENSG00000087087	ENSG00000087470		ENSG00000082068
ENSG00000082146	ENSG00000114391	ENSG00000087095	ENSG00000087502		ENSG00000082146
ENSG00000082212	ENSG00000114446	ENSG00000087111	ENSG00000087510		ENSG00000082212
ENSG00000082258	ENSG00000114480	ENSG00000087157	ENSG00000087586		ENSG00000082258
ENSG00000082269	ENSG00000114573	ENSG00000087191	ENSG00000087884		ENSG00000082269
ENSG00000082293	ENSG00000114648	ENSG00000087258	ENSG00000087903		ENSG00000082293
ENSG00000082458	ENSG00000114650	ENSG00000087263	ENSG00000087916		ENSG00000082458
ENSG00000082512	ENSG00000114738	ENSG00000087269	ENSG00000087995		ENSG00000082512
ENSG00000082515	ENSG00000114767	ENSG00000087274	ENSG00000088035		ENSG00000082515
ENSG00000082684	ENSG00000114770	ENSG00000087299	ENSG00000088038		ENSG00000082684
ENSG00000082701	ENSG00000114850	ENSG00000087302	ENSG00000088179		ENSG00000082701
ENSG00000082805	ENSG00000114859	ENSG00000087303	ENSG00000088205		ENSG00000082805
ENSG00000082898	ENSG00000114993	ENSG00000087338	ENSG00000088247		ENSG00000082898
ENSG00000082996	ENSG00000115020	ENSG00000087365	ENSG00000088256		ENSG00000082996
ENSG00000083097	ENSG00000115084	ENSG00000087470	ENSG00000088298		ENSG00000083097
ENSG00000083123	ENSG00000115091	ENSG00000087510	ENSG00000088356		ENSG00000083123
ENSG00000083168	ENSG00000115128	ENSG00000087586	ENSG00000088367		ENSG00000083168
ENSG00000083223	ENSG00000115159	ENSG00000087903	ENSG00000088386		ENSG00000083223
ENSG00000083290	ENSG00000115204	ENSG00000087995	ENSG00000088387		ENSG00000083290
ENSG00000083307	ENSG00000115211	ENSG00000088002	ENSG00000088451		ENSG00000083307
ENSG00000083312	ENSG00000115233	ENSG00000088035	ENSG00000088538		ENSG00000083312
ENSG00000083444	ENSG00000115234	ENSG00000088038	ENSG00000088766		ENSG00000083444
ENSG00000083520	ENSG00000115241	ENSG00000088179	ENSG00000088812		ENSG00000083520
ENSG00000083544	ENSG00000115268	ENSG00000088205	ENSG00000088832		ENSG00000083544
ENSG00000083642	ENSG00000115275	ENSG00000088247	ENSG00000088833		ENSG00000083642
ENSG00000083720	ENSG00000115306	ENSG00000088256	ENSG00000088836		ENSG00000083720
ENSG00000083750	ENSG00000115307	ENSG00000088298	ENSG00000088881		ENSG00000083750
ENSG00000083799	ENSG00000115355	ENSG00000088386	ENSG00000088930		ENSG00000083799
ENSG00000083842	ENSG00000115446	ENSG00000088387	ENSG00000088986		ENSG00000083842
ENSG00000083845	ENSG00000115468	ENSG00000088451	ENSG00000089009		ENSG00000083845
ENSG00000083857	ENSG00000115484	ENSG00000088538	ENSG00000089048		ENSG00000083857
ENSG00000083937	ENSG00000115514	ENSG00000088756	ENSG00000089057		ENSG00000083937
ENSG00000084070	ENSG00000115524	ENSG00000088766	ENSG00000089060		ENSG00000084070
ENSG00000084073	ENSG00000115540	ENSG00000088812	ENSG00000089094		ENSG00000084073
ENSG00000084090	ENSG00000115541	ENSG00000088826	ENSG00000089116		ENSG00000084090
ENSG00000084092	ENSG00000115561	ENSG00000088832	ENSG00000089123		ENSG00000084092
ENSG00000084110	ENSG00000115641	ENSG00000088836	ENSG00000089154		ENSG00000084110
ENSG00000084207	ENSG00000115652	ENSG00000088881	ENSG00000089157		ENSG00000084207
ENSG00000084234	ENSG00000115657	ENSG00000088882	ENSG00000089163		ENSG00000084234
ENSG00000084623	ENSG00000115665	ENSG00000088930	ENSG00000089169		ENSG00000084623
ENSG00000084636	ENSG00000115677	ENSG00000089006	ENSG00000089195		ENSG00000084636
ENSG00000084652	ENSG00000115685	ENSG00000089009	ENSG00000089220		ENSG00000084652
ENSG00000084710	ENSG00000115694	ENSG00000089048	ENSG00000089234		ENSG00000084710
ENSG00000084731	ENSG00000115758	ENSG00000089053	ENSG00000089280		ENSG00000084731
ENSG00000084733	ENSG00000115761	ENSG00000089057	ENSG00000089289		ENSG00000084733
ENSG00000084754	ENSG00000115816	ENSG00000089060	ENSG00000089597		ENSG00000084754
ENSG00000084764	ENSG00000115825	ENSG00000089094	ENSG00000089685		ENSG00000084764
ENSG00000084774	ENSG00000115840	ENSG00000089116	ENSG00000089693		ENSG00000084774
ENSG00000085224	ENSG00000115875	ENSG00000089123	ENSG00000089723		ENSG00000085224
ENSG00000085231	ENSG00000115904	ENSG00000089154	ENSG00000089737		ENSG00000085231
ENSG00000085276	ENSG00000115942	ENSG00000089157	ENSG00000089818		ENSG00000085276
ENSG00000085365	ENSG00000115946	ENSG00000089163	ENSG00000089820		ENSG00000085365
ENSG00000085382	ENSG00000116017	ENSG00000089195	ENSG00000090020		ENSG00000085382
ENSG00000085415	ENSG00000116062	ENSG00000089220	ENSG00000090054		ENSG00000085415
ENSG00000085433	ENSG00000116133	ENSG00000089234	ENSG00000090060		ENSG00000085433
ENSG00000085449	ENSG00000116138	ENSG00000089280	ENSG00000090061		ENSG00000085449
ENSG00000085491	ENSG00000116141	ENSG00000089289	ENSG00000090238		ENSG00000085491
ENSG00000085511	ENSG00000116157	ENSG00000089597	ENSG00000090263		ENSG00000085511
ENSG00000085563	ENSG00000116237	ENSG00000089639	ENSG00000090273		ENSG00000085563
ENSG00000085719	ENSG00000116251	ENSG00000089693	ENSG00000090316		ENSG00000085719
ENSG00000085721	ENSG00000116260	ENSG00000089723	ENSG00000090372		ENSG00000085721
ENSG00000085760	ENSG00000116288	ENSG00000089737	ENSG00000090402		ENSG00000085760
ENSG00000085831	ENSG00000116337	ENSG00000089818	ENSG00000090447		ENSG00000085831
ENSG00000085832	ENSG00000116473	ENSG00000089820	ENSG00000090520		ENSG00000085832
ENSG00000085840	ENSG00000116478	ENSG00000089902	ENSG00000090612		ENSG00000085840
ENSG00000085872	ENSG00000116489	ENSG00000090054	ENSG00000090621		ENSG00000085872
ENSG00000085978	ENSG00000116604	ENSG00000090060	ENSG00000090661		ENSG00000085978
ENSG00000085998	ENSG00000116641	ENSG00000090238	ENSG00000090674		ENSG00000085998
ENSG00000085999	ENSG00000116679	ENSG00000090263	ENSG00000090686		ENSG00000085999
ENSG00000086015	ENSG00000116685	ENSG00000090273	ENSG00000090857		ENSG00000086015
ENSG00000086061	ENSG00000116688	ENSG00000090316	ENSG00000090861		ENSG00000086061
ENSG00000086065	ENSG00000116704	ENSG00000090372	ENSG00000090863		ENSG00000086065
ENSG00000086102	ENSG00000116729	ENSG00000090447	ENSG00000090889		ENSG00000086102
ENSG00000086189	ENSG00000116747	ENSG00000090520	ENSG00000090920		ENSG00000086189
ENSG00000086205	ENSG00000116750	ENSG00000090565	ENSG00000090975		ENSG00000086205
ENSG00000086288	ENSG00000116752	ENSG00000090621	ENSG00000090989		ENSG00000086288
ENSG00000086475	ENSG00000116783	ENSG00000090661	ENSG00000091009		ENSG00000086475
ENSG00000086504	ENSG00000116791	ENSG00000090674	ENSG00000091010		ENSG00000086504
ENSG00000086570	ENSG00000116885	ENSG00000090686	ENSG00000091039		ENSG00000086570
ENSG00000086589	ENSG00000116903	ENSG00000090776	ENSG00000091127		ENSG00000086589
ENSG00000086598	ENSG00000116906	ENSG00000090857	ENSG00000091128		ENSG00000086598
ENSG00000086619	ENSG00000116957	ENSG00000090861	ENSG00000091129		ENSG00000086619
ENSG00000086666	ENSG00000116991	ENSG00000090863	ENSG00000091136		ENSG00000086666
ENSG00000086712	ENSG00000117054	ENSG00000090889	ENSG00000091140		ENSG00000086712
ENSG00000086717	ENSG00000117114	ENSG00000090932	ENSG00000091157		ENSG00000086717
ENSG00000086758	ENSG00000117118	ENSG00000090975	ENSG00000091164		ENSG00000086758
ENSG00000086827	ENSG00000117133	ENSG00000090989	ENSG00000091262		ENSG00000086827
ENSG00000086848	ENSG00000117139	ENSG00000091009	ENSG00000091409		ENSG00000086848
ENSG00000087008	ENSG00000117222	ENSG00000091010	ENSG00000091428		ENSG00000087008
ENSG00000087053	ENSG00000117245	ENSG00000091039	ENSG00000091436		ENSG00000087053
ENSG00000087076	ENSG00000117262	ENSG00000091127	ENSG00000091483		ENSG00000087076
ENSG00000087077	ENSG00000117298	ENSG00000091128	ENSG00000091536		ENSG00000087077
ENSG00000087085	ENSG00000117305	ENSG00000091129	ENSG00000091622		ENSG00000087085
ENSG00000087086	ENSG00000117308	ENSG00000091136	ENSG00000091656		ENSG00000087086
ENSG00000087087	ENSG00000117394	ENSG00000091137	ENSG00000091664		ENSG00000087087
ENSG00000087095	ENSG00000117395	ENSG00000091138	ENSG00000091704		ENSG00000087095
ENSG00000087111	ENSG00000117410	ENSG00000091140	ENSG00000091844		ENSG00000087111
ENSG00000087157	ENSG00000117411	ENSG00000091157	ENSG00000092020		ENSG00000087157
ENSG00000087191	ENSG00000117419	ENSG00000091164	ENSG00000092054		ENSG00000087191
ENSG00000087258	ENSG00000117479	ENSG00000091409	ENSG00000092068		ENSG00000087258
ENSG00000087263	ENSG00000117481	ENSG00000091483	ENSG00000092094		ENSG00000087263
ENSG00000087269	ENSG00000117500	ENSG00000091622	ENSG00000092108		ENSG00000087269
ENSG00000087274	ENSG00000117505	ENSG00000091656	ENSG00000092148		ENSG00000087274
ENSG00000087299	ENSG00000117528	ENSG00000091664	ENSG00000092201		ENSG00000087299
ENSG00000087302	ENSG00000117543	ENSG00000091704	ENSG00000092208		ENSG00000087302
ENSG00000087303	ENSG00000117592	ENSG00000091732	ENSG00000092421		ENSG00000087303
ENSG00000087338	ENSG00000117598	ENSG00000091844	ENSG00000092439		ENSG00000087338
ENSG00000087365	ENSG00000117614	ENSG00000091879	ENSG00000092529		ENSG00000087365
ENSG00000087460	ENSG00000117676	ENSG00000092067	ENSG00000092621		ENSG00000087460
ENSG00000087470	ENSG00000117682	ENSG00000092068	ENSG00000092820		ENSG00000087470
ENSG00000087495	ENSG00000117751	ENSG00000092094	ENSG00000092841		ENSG00000087495
ENSG00000087502	ENSG00000117791	ENSG00000092148	ENSG00000092847		ENSG00000087502
ENSG00000087510	ENSG00000117859	ENSG00000092200	ENSG00000092853		ENSG00000087510
ENSG00000087586	ENSG00000117862	ENSG00000092201	ENSG00000092931		ENSG00000087586
ENSG00000087903	ENSG00000117899	ENSG00000092208	ENSG00000092964		ENSG00000087903
ENSG00000087916	ENSG00000117971	ENSG00000092421	ENSG00000093000		ENSG00000087916
ENSG00000087995	ENSG00000117984	ENSG00000092439	ENSG00000093009		ENSG00000087995
ENSG00000088035	ENSG00000118046	ENSG00000092529	ENSG00000093144		ENSG00000088035
ENSG00000088038	ENSG00000118096	ENSG00000092531	ENSG00000093167		ENSG00000088038
ENSG00000088179	ENSG00000118200	ENSG00000092607	ENSG00000093217		ENSG00000088179
ENSG00000088205	ENSG00000118454	ENSG00000092621	ENSG00000094631		ENSG00000088205
ENSG00000088247	ENSG00000118491	ENSG00000092758	ENSG00000094804		ENSG00000088247
ENSG00000088256	ENSG00000118508	ENSG00000092820	ENSG00000094841		ENSG00000088256
ENSG00000088280	ENSG00000118514	ENSG00000092841	ENSG00000094880		ENSG00000088280
ENSG00000088298	ENSG00000118515	ENSG00000092847	ENSG00000094916		ENSG00000088298
ENSG00000088320	ENSG00000118762	ENSG00000092850	ENSG00000094963		ENSG00000088320
ENSG00000088340	ENSG00000118961	ENSG00000092929	ENSG00000094975		ENSG00000088340
ENSG00000088386	ENSG00000118965	ENSG00000092931	ENSG00000095002		ENSG00000088386
ENSG00000088387	ENSG00000119041	ENSG00000092964	ENSG00000095059		ENSG00000088387
ENSG00000088451	ENSG00000119203	ENSG00000092969	ENSG00000095066		ENSG00000088451
ENSG00000088538	ENSG00000119326	ENSG00000093009	ENSG00000095139		ENSG00000088538
ENSG00000088766	ENSG00000119335	ENSG00000093144	ENSG00000095209		ENSG00000088766
ENSG00000088808	ENSG00000119383	ENSG00000093183	ENSG00000095321		ENSG00000088808
ENSG00000088812	ENSG00000119396	ENSG00000093217	ENSG00000095383		ENSG00000088812
ENSG00000088826	ENSG00000119414	ENSG00000094631	ENSG00000095485		ENSG00000088826
ENSG00000088832	ENSG00000119421	ENSG00000094804	ENSG00000095564		ENSG00000088832
ENSG00000088833	ENSG00000119431	ENSG00000094841	ENSG00000095587		ENSG00000088833
ENSG00000088836	ENSG00000119471	ENSG00000094880	ENSG00000095794		ENSG00000088836
ENSG00000088881	ENSG00000119509	ENSG00000094916	ENSG00000095906		ENSG00000088881
ENSG00000088882	ENSG00000119523	ENSG00000094963	ENSG00000096060		ENSG00000088882
ENSG00000088930	ENSG00000119541	ENSG00000095002	ENSG00000096063		ENSG00000088930
ENSG00000089006	ENSG00000119614	ENSG00000095059	ENSG00000096070		ENSG00000089006
ENSG00000089009	ENSG00000119616	ENSG00000095066	ENSG00000096080		ENSG00000089009
ENSG00000089048	ENSG00000119685	ENSG00000095139	ENSG00000096093		ENSG00000089048
ENSG00000089057	ENSG00000119686	ENSG00000095209	ENSG00000096150		ENSG00000089057
ENSG00000089060	ENSG00000119688	ENSG00000095261	ENSG00000096171		ENSG00000089060
ENSG00000089094	ENSG00000119698	ENSG00000095321	ENSG00000096384		ENSG00000089094
ENSG00000089116	ENSG00000119707	ENSG00000095383	ENSG00000096401		ENSG00000089116
ENSG00000089123	ENSG00000119711	ENSG00000095485	ENSG00000096433		ENSG00000089123
ENSG00000089154	ENSG00000119723	ENSG00000095564	ENSG00000096654		ENSG00000089154
ENSG00000089157	ENSG00000119787	ENSG00000095587	ENSG00000096696		ENSG00000089157
ENSG00000089163	ENSG00000119801	ENSG00000095794	ENSG00000096717		ENSG00000089163
ENSG00000089169	ENSG00000119820	ENSG00000096006	ENSG00000096872		ENSG00000089169
ENSG00000089195	ENSG00000119844	ENSG00000096060	ENSG00000097007		ENSG00000089195
ENSG00000089220	ENSG00000119899	ENSG00000096070	ENSG00000097033		ENSG00000089220
ENSG00000089234	ENSG00000119912	ENSG00000096093	ENSG00000097046		ENSG00000089234
ENSG00000089280	ENSG00000119927	ENSG00000096150	ENSG00000099139		ENSG00000089280
ENSG00000089289	ENSG00000119929	ENSG00000096171	ENSG00000099194		ENSG00000089289
ENSG00000089486	ENSG00000119943	ENSG00000096238	ENSG00000099204		ENSG00000089486
ENSG00000089597	ENSG00000119953	ENSG00000096384	ENSG00000099219		ENSG00000089597
ENSG00000089639	ENSG00000120008	ENSG00000096401	ENSG00000099246		ENSG00000089639
ENSG00000089685	ENSG00000120087	ENSG00000096433	ENSG00000099256		ENSG00000089685
ENSG00000089693	ENSG00000120158	ENSG00000096467	ENSG00000099308		ENSG00000089693
ENSG00000089723	ENSG00000120162	ENSG00000096474	ENSG00000099331		ENSG00000089723
ENSG00000089737	ENSG00000120265	ENSG00000096654	ENSG00000099341		ENSG00000089737
ENSG00000089818	ENSG00000120314	ENSG00000096717	ENSG00000099365		ENSG00000089818
ENSG00000089820	ENSG00000120438	ENSG00000096746	ENSG00000099381		ENSG00000089820
ENSG00000089876	ENSG00000120457	ENSG00000096872	ENSG00000099622		ENSG00000089876
ENSG00000090006	ENSG00000120526	ENSG00000097007	ENSG00000099624		ENSG00000090006
ENSG00000090020	ENSG00000120594	ENSG00000097021	ENSG00000099785		ENSG00000090020
ENSG00000090054	ENSG00000120686	ENSG00000097033	ENSG00000099795		ENSG00000090054
ENSG00000090060	ENSG00000120693	ENSG00000099194	ENSG00000099797		ENSG00000090060
ENSG00000090061	ENSG00000120697	ENSG00000099203	ENSG00000099800		ENSG00000090061
ENSG00000090238	ENSG00000120800	ENSG00000099204	ENSG00000099804		ENSG00000090238
ENSG00000090263	ENSG00000120805	ENSG00000099219	ENSG00000099810		ENSG00000090263
ENSG00000090273	ENSG00000120907	ENSG00000099246	ENSG00000099817		ENSG00000090273
ENSG00000090316	ENSG00000120925	ENSG00000099256	ENSG00000099821		ENSG00000090316
ENSG00000090372	ENSG00000120963	ENSG00000099308	ENSG00000099875		ENSG00000090372
ENSG00000090376	ENSG00000120992	ENSG00000099326	ENSG00000099882		ENSG00000090376
ENSG00000090447	ENSG00000121022	ENSG00000099331	ENSG00000099899		ENSG00000090447
ENSG00000090520	ENSG00000121064	ENSG00000099337	ENSG00000099901		ENSG00000090520
ENSG00000090530	ENSG00000121067	ENSG00000099341	ENSG00000099904		ENSG00000090530
ENSG00000090565	ENSG00000121068	ENSG00000099364	ENSG00000099940		ENSG00000090565
ENSG00000090661	ENSG00000121083	ENSG00000099365	ENSG00000099942		ENSG00000090661
ENSG00000090674	ENSG00000121390	ENSG00000099624	ENSG00000099956		ENSG00000090674
ENSG00000090776	ENSG00000121579	ENSG00000099783	ENSG00000099958		ENSG00000090776
ENSG00000090857	ENSG00000121644	ENSG00000099795	ENSG00000099960		ENSG00000090857
ENSG00000090861	ENSG00000121691	ENSG00000099797	ENSG00000099977		ENSG00000090861
ENSG00000090863	ENSG00000121879	ENSG00000099800	ENSG00000099984		ENSG00000090863
ENSG00000090889	ENSG00000121897	ENSG00000099804	ENSG00000099992		ENSG00000090889
ENSG00000090924	ENSG00000121933	ENSG00000099810	ENSG00000099994		ENSG00000090924
ENSG00000090932	ENSG00000121957	ENSG00000099817	ENSG00000099995		ENSG00000090932
ENSG00000090975	ENSG00000122008	ENSG00000099849	ENSG00000100003		ENSG00000090975
ENSG00000090989	ENSG00000122026	ENSG00000099875	ENSG00000100012		ENSG00000090989
ENSG00000091009	ENSG00000122042	ENSG00000099889	ENSG00000100023		ENSG00000091009
ENSG00000091010	ENSG00000122218	ENSG00000099899	ENSG00000100024		ENSG00000091010
ENSG00000091039	ENSG00000122367	ENSG00000099904	ENSG00000100027		ENSG00000091039
ENSG00000091128	ENSG00000122378	ENSG00000099917	ENSG00000100028		ENSG00000091128
ENSG00000091129	ENSG00000122390	ENSG00000099940	ENSG00000100029		ENSG00000091129
ENSG00000091136	ENSG00000122406	ENSG00000099942	ENSG00000100030		ENSG00000091136
ENSG00000091140	ENSG00000122435	ENSG00000099953	ENSG00000100031		ENSG00000091140
ENSG00000091157	ENSG00000122490	ENSG00000099956	ENSG00000100033		ENSG00000091157
ENSG00000091164	ENSG00000122507	ENSG00000099958	ENSG00000100038		ENSG00000091164
ENSG00000091262	ENSG00000122512	ENSG00000099960	ENSG00000100056		ENSG00000091262
ENSG00000091409	ENSG00000122545	ENSG00000099992	ENSG00000100075		ENSG00000091409
ENSG00000091428	ENSG00000122642	ENSG00000099994	ENSG00000100077		ENSG00000091428
ENSG00000091483	ENSG00000122643	ENSG00000099995	ENSG00000100083		ENSG00000091483
ENSG00000091583	ENSG00000122687	ENSG00000100003	ENSG00000100084		ENSG00000091583
ENSG00000091622	ENSG00000122692	ENSG00000100012	ENSG00000100109		ENSG00000091622
ENSG00000091656	ENSG00000122696	ENSG00000100023	ENSG00000100116		ENSG00000091656
ENSG00000091664	ENSG00000122729	ENSG00000100024	ENSG00000100129		ENSG00000091664
ENSG00000091704	ENSG00000122873	ENSG00000100027	ENSG00000100138		ENSG00000091704
ENSG00000091831	ENSG00000122884	ENSG00000100028	ENSG00000100142		ENSG00000091831
ENSG00000091844	ENSG00000122965	ENSG00000100029	ENSG00000100150		ENSG00000091844
ENSG00000092010	ENSG00000122970	ENSG00000100030	ENSG00000100151		ENSG00000092010
ENSG00000092020	ENSG00000123064	ENSG00000100031	ENSG00000100197		ENSG00000092020
ENSG00000092051	ENSG00000123091	ENSG00000100033	ENSG00000100201		ENSG00000092051
ENSG00000092068	ENSG00000123124	ENSG00000100034	ENSG00000100206		ENSG00000092068
ENSG00000092094	ENSG00000123130	ENSG00000100038	ENSG00000100209		ENSG00000092094
ENSG00000092108	ENSG00000123136	ENSG00000100055	ENSG00000100216		ENSG00000092108
ENSG00000092148	ENSG00000123154	ENSG00000100056	ENSG00000100220		ENSG00000092148
ENSG00000092200	ENSG00000123159	ENSG00000100075	ENSG00000100221		ENSG00000092200
ENSG00000092201	ENSG00000123178	ENSG00000100077	ENSG00000100226		ENSG00000092201
ENSG00000092203	ENSG00000123297	ENSG00000100083	ENSG00000100241		ENSG00000092203
ENSG00000092208	ENSG00000123395	ENSG00000100084	ENSG00000100243		ENSG00000092208
ENSG00000092345	ENSG00000123416	ENSG00000100092	ENSG00000100253		ENSG00000092345
ENSG00000092421	ENSG00000123454	ENSG00000100097	ENSG00000100258		ENSG00000092421
ENSG00000092529	ENSG00000123505	ENSG00000100106	ENSG00000100266		ENSG00000092529
ENSG00000092531	ENSG00000123607	ENSG00000100109	ENSG00000100280		ENSG00000092531
ENSG00000092607	ENSG00000123612	ENSG00000100116	ENSG00000100284		ENSG00000092607
ENSG00000092621	ENSG00000123636	ENSG00000100129	ENSG00000100288		ENSG00000092621
ENSG00000092820	ENSG00000123684	ENSG00000100138	ENSG00000100294		ENSG00000092820
ENSG00000092841	ENSG00000123737	ENSG00000100139	ENSG00000100296		ENSG00000092841
ENSG00000092847	ENSG00000123908	ENSG00000100142	ENSG00000100297		ENSG00000092847
ENSG00000092850	ENSG00000123975	ENSG00000100146	ENSG00000100299		ENSG00000092850
ENSG00000092853	ENSG00000123989	ENSG00000100150	ENSG00000100300		ENSG00000092853
ENSG00000092929	ENSG00000124003	ENSG00000100151	ENSG00000100304		ENSG00000092929
ENSG00000092931	ENSG00000124067	ENSG00000100197	ENSG00000100316		ENSG00000092931
ENSG00000092969	ENSG00000124164	ENSG00000100209	ENSG00000100321		ENSG00000092969
ENSG00000093000	ENSG00000124181	ENSG00000100216	ENSG00000100324		ENSG00000093000
ENSG00000093009	ENSG00000124193	ENSG00000100220	ENSG00000100330		ENSG00000093009
ENSG00000093100	ENSG00000124214	ENSG00000100221	ENSG00000100336		ENSG00000093100
ENSG00000093144	ENSG00000124222	ENSG00000100226	ENSG00000100345		ENSG00000093144
ENSG00000093167	ENSG00000124228	ENSG00000100234	ENSG00000100346		ENSG00000093167
ENSG00000093217	ENSG00000124299	ENSG00000100239	ENSG00000100347		ENSG00000093217
ENSG00000094755	ENSG00000124357	ENSG00000100241	ENSG00000100348		ENSG00000094755
ENSG00000094841	ENSG00000124370	ENSG00000100243	ENSG00000100353		ENSG00000094841
ENSG00000094880	ENSG00000124383	ENSG00000100253	ENSG00000100359		ENSG00000094880
ENSG00000094963	ENSG00000124406	ENSG00000100258	ENSG00000100364		ENSG00000094963
ENSG00000094975	ENSG00000124493	ENSG00000100266	ENSG00000100380		ENSG00000094975
ENSG00000095002	ENSG00000124541	ENSG00000100280	ENSG00000100387		ENSG00000095002
ENSG00000095059	ENSG00000124610	ENSG00000100284	ENSG00000100393		ENSG00000095059
ENSG00000095066	ENSG00000124614	ENSG00000100288	ENSG00000100395		ENSG00000095066
ENSG00000095139	ENSG00000124615	ENSG00000100294	ENSG00000100401		ENSG00000095139
ENSG00000095203	ENSG00000124641	ENSG00000100296	ENSG00000100410		ENSG00000095203
ENSG00000095209	ENSG00000124702	ENSG00000100297	ENSG00000100412		ENSG00000095209
ENSG00000095321	ENSG00000124772	ENSG00000100300	ENSG00000100413		ENSG00000095321
ENSG00000095383	ENSG00000124783	ENSG00000100302	ENSG00000100416		ENSG00000095383
ENSG00000095485	ENSG00000124786	ENSG00000100304	ENSG00000100417		ENSG00000095485
ENSG00000095539	ENSG00000124813	ENSG00000100311	ENSG00000100422		ENSG00000095539
ENSG00000095587	ENSG00000125046	ENSG00000100316	ENSG00000100425		ENSG00000095587
ENSG00000095637	ENSG00000125107	ENSG00000100321	ENSG00000100426		ENSG00000095637
ENSG00000095777	ENSG00000125124	ENSG00000100324	ENSG00000100429		ENSG00000095777
ENSG00000095794	ENSG00000125149	ENSG00000100330	ENSG00000100439		ENSG00000095794
ENSG00000096006	ENSG00000125207	ENSG00000100341	ENSG00000100462		ENSG00000096006
ENSG00000096060	ENSG00000125246	ENSG00000100344	ENSG00000100479		ENSG00000096060
ENSG00000096063	ENSG00000125247	ENSG00000100345	ENSG00000100483		ENSG00000096063
ENSG00000096070	ENSG00000125249	ENSG00000100347	ENSG00000100485		ENSG00000096070
ENSG00000096080	ENSG00000125257	ENSG00000100348	ENSG00000100504		ENSG00000096080
ENSG00000096088	ENSG00000125266	ENSG00000100353	ENSG00000100505		ENSG00000096088
ENSG00000096093	ENSG00000125304	ENSG00000100359	ENSG00000100519		ENSG00000096093
ENSG00000096384	ENSG00000125351	ENSG00000100364	ENSG00000100522		ENSG00000096384
ENSG00000096401	ENSG00000125430	ENSG00000100379	ENSG00000100523		ENSG00000096401
ENSG00000096433	ENSG00000125450	ENSG00000100380	ENSG00000100528		ENSG00000096433
ENSG00000096696	ENSG00000125630	ENSG00000100387	ENSG00000100554		ENSG00000096696
ENSG00000096717	ENSG00000125633	ENSG00000100393	ENSG00000100567		ENSG00000096717
ENSG00000096746	ENSG00000125651	ENSG00000100395	ENSG00000100568		ENSG00000096746
ENSG00000096872	ENSG00000125652	ENSG00000100399	ENSG00000100575		ENSG00000096872
ENSG00000097007	ENSG00000125656	ENSG00000100410	ENSG00000100577		ENSG00000097007
ENSG00000097033	ENSG00000125675	ENSG00000100412	ENSG00000100591		ENSG00000097033
ENSG00000097046	ENSG00000125676	ENSG00000100413	ENSG00000100592		ENSG00000097046
ENSG00000097096	ENSG00000125691	ENSG00000100416	ENSG00000100596		ENSG00000097096
ENSG00000099194	ENSG00000125743	ENSG00000100417	ENSG00000100600		ENSG00000099194
ENSG00000099203	ENSG00000125746	ENSG00000100422	ENSG00000100601		ENSG00000099203
ENSG00000099204	ENSG00000125821	ENSG00000100425	ENSG00000100603		ENSG00000099204
ENSG00000099219	ENSG00000125851	ENSG00000100426	ENSG00000100614		ENSG00000099219
ENSG00000099246	ENSG00000125870	ENSG00000100429	ENSG00000100632		ENSG00000099246
ENSG00000099256	ENSG00000125875	ENSG00000100439	ENSG00000100644		ENSG00000099256
ENSG00000099284	ENSG00000125877	ENSG00000100461	ENSG00000100664		ENSG00000099284
ENSG00000099308	ENSG00000125944	ENSG00000100462	ENSG00000100665		ENSG00000099308
ENSG00000099331	ENSG00000125971	ENSG00000100479	ENSG00000100678		ENSG00000099331
ENSG00000099337	ENSG00000125977	ENSG00000100483	ENSG00000100697		ENSG00000099337
ENSG00000099341	ENSG00000125991	ENSG00000100485	ENSG00000100714		ENSG00000099341
ENSG00000099364	ENSG00000126016	ENSG00000100504	ENSG00000100722		ENSG00000099364
ENSG00000099365	ENSG00000126062	ENSG00000100505	ENSG00000100731		ENSG00000099365
ENSG00000099377	ENSG00000126067	ENSG00000100522	ENSG00000100744		ENSG00000099377
ENSG00000099381	ENSG00000126226	ENSG00000100523	ENSG00000100749		ENSG00000099381
ENSG00000099385	ENSG00000126261	ENSG00000100528	ENSG00000100764		ENSG00000099385
ENSG00000099622	ENSG00000126524	ENSG00000100532	ENSG00000100767		ENSG00000099622
ENSG00000099624	ENSG00000126581	ENSG00000100554	ENSG00000100784		ENSG00000099624
ENSG00000099715	ENSG00000126602	ENSG00000100567	ENSG00000100796		ENSG00000099715
ENSG00000099725	ENSG00000126653	ENSG00000100575	ENSG00000100804		ENSG00000099725
ENSG00000099769	ENSG00000126698	ENSG00000100577	ENSG00000100813		ENSG00000099769
ENSG00000099783	ENSG00000126767	ENSG00000100591	ENSG00000100815		ENSG00000099783
ENSG00000099785	ENSG00000126814	ENSG00000100592	ENSG00000100823		ENSG00000099785
ENSG00000099795	ENSG00000126870	ENSG00000100596	ENSG00000100836		ENSG00000099795
ENSG00000099797	ENSG00000126883	ENSG00000100599	ENSG00000100852		ENSG00000099797
ENSG00000099800	ENSG00000127022	ENSG00000100600	ENSG00000100883		ENSG00000099800
ENSG00000099804	ENSG00000127054	ENSG00000100601	ENSG00000100888		ENSG00000099804
ENSG00000099810	ENSG00000127084	ENSG00000100603	ENSG00000100889		ENSG00000099810
ENSG00000099817	ENSG00000127125	ENSG00000100614	ENSG00000100897		ENSG00000099817
ENSG00000099821	ENSG00000127334	ENSG00000100626	ENSG00000100902		ENSG00000099821
ENSG00000099849	ENSG00000127337	ENSG00000100628	ENSG00000100908		ENSG00000099849
ENSG00000099875	ENSG00000127418	ENSG00000100632	ENSG00000100934		ENSG00000099875
ENSG00000099882	ENSG00000127445	ENSG00000100650	ENSG00000100938		ENSG00000099882
ENSG00000099889	ENSG00000127463	ENSG00000100664	ENSG00000100941		ENSG00000099889
ENSG00000099899	ENSG00000127481	ENSG00000100678	ENSG00000100949		ENSG00000099899
ENSG00000099904	ENSG00000127527	ENSG00000100697	ENSG00000100983		ENSG00000099904
ENSG00000099917	ENSG00000127554	ENSG00000100714	ENSG00000100994		ENSG00000099917
ENSG00000099940	ENSG00000127580	ENSG00000100722	ENSG00000100997		ENSG00000099940
ENSG00000099942	ENSG00000127586	ENSG00000100726	ENSG00000101003		ENSG00000099942
ENSG00000099954	ENSG00000127603	ENSG00000100731	ENSG00000101019		ENSG00000099954
ENSG00000099956	ENSG00000127837	ENSG00000100744	ENSG00000101049		ENSG00000099956
ENSG00000099958	ENSG00000127884	ENSG00000100749	ENSG00000101052		ENSG00000099958
ENSG00000099960	ENSG00000127955	ENSG00000100764	ENSG00000101076		ENSG00000099960
ENSG00000099974	ENSG00000128039	ENSG00000100767	ENSG00000101079		ENSG00000099974
ENSG00000099977	ENSG00000128050	ENSG00000100784	ENSG00000101084		ENSG00000099977
ENSG00000099992	ENSG00000128191	ENSG00000100796	ENSG00000101104		ENSG00000099992
ENSG00000099994	ENSG00000128524	ENSG00000100804	ENSG00000101109		ENSG00000099994
ENSG00000099995	ENSG00000128534	ENSG00000100823	ENSG00000101115		ENSG00000099995
ENSG00000099999	ENSG00000128578	ENSG00000100836	ENSG00000101132		ENSG00000099999
ENSG00000100003	ENSG00000128595	ENSG00000100852	ENSG00000101138		ENSG00000100003
ENSG00000100012	ENSG00000128609	ENSG00000100867	ENSG00000101146		ENSG00000100012
ENSG00000100014	ENSG00000128654	ENSG00000100883	ENSG00000101152		ENSG00000100014
ENSG00000100023	ENSG00000128683	ENSG00000100888	ENSG00000101160		ENSG00000100023
ENSG00000100024	ENSG00000128694	ENSG00000100889	ENSG00000101161		ENSG00000100024
ENSG00000100027	ENSG00000128708	ENSG00000100897	ENSG00000101162		ENSG00000100027
ENSG00000100028	ENSG00000128928	ENSG00000100902	ENSG00000101166		ENSG00000100028
ENSG00000100029	ENSG00000128951	ENSG00000100908	ENSG00000101181		ENSG00000100029
ENSG00000100030	ENSG00000128965	ENSG00000100934	ENSG00000101182		ENSG00000100030
ENSG00000100031	ENSG00000129083	ENSG00000100938	ENSG00000101187		ENSG00000100031
ENSG00000100033	ENSG00000129128	ENSG00000100941	ENSG00000101193		ENSG00000100033
ENSG00000100034	ENSG00000129151	ENSG00000100949	ENSG00000101194		ENSG00000100034
ENSG00000100038	ENSG00000129159	ENSG00000100979	ENSG00000101199		ENSG00000100038
ENSG00000100055	ENSG00000129255	ENSG00000100983	ENSG00000101204		ENSG00000100055
ENSG00000100056	ENSG00000129270	ENSG00000100987	ENSG00000101210		ENSG00000100056
ENSG00000100068	ENSG00000129315	ENSG00000100994	ENSG00000101224		ENSG00000100068
ENSG00000100075	ENSG00000129347	ENSG00000100997	ENSG00000101246		ENSG00000100075
ENSG00000100077	ENSG00000129354	ENSG00000101003	ENSG00000101247		ENSG00000100077
ENSG00000100083	ENSG00000129460	ENSG00000101019	ENSG00000101251		ENSG00000100083
ENSG00000100084	ENSG00000129467	ENSG00000101049	ENSG00000101265		ENSG00000100084
ENSG00000100092	ENSG00000129518	ENSG00000101052	ENSG00000101266		ENSG00000100092
ENSG00000100106	ENSG00000129559	ENSG00000101074	ENSG00000101276		ENSG00000100106
ENSG00000100109	ENSG00000129562	ENSG00000101076	ENSG00000101278		ENSG00000100109
ENSG00000100116	ENSG00000129625	ENSG00000101079	ENSG00000101290		ENSG00000100116
ENSG00000100121	ENSG00000129636	ENSG00000101104	ENSG00000101294		ENSG00000100121
ENSG00000100129	ENSG00000129657	ENSG00000101109	ENSG00000101310		ENSG00000100129
ENSG00000100138	ENSG00000129667	ENSG00000101115	ENSG00000101311		ENSG00000100138
ENSG00000100142	ENSG00000129691	ENSG00000101132	ENSG00000101323		ENSG00000100142
ENSG00000100150	ENSG00000129933	ENSG00000101138	ENSG00000101333		ENSG00000100150
ENSG00000100151	ENSG00000130021	ENSG00000101144	ENSG00000101335		ENSG00000100151
ENSG00000100154	ENSG00000130119	ENSG00000101146	ENSG00000101337		ENSG00000100154
ENSG00000100196	ENSG00000130159	ENSG00000101150	ENSG00000101343		ENSG00000100196
ENSG00000100201	ENSG00000130165	ENSG00000101152	ENSG00000101346		ENSG00000100201
ENSG00000100209	ENSG00000130175	ENSG00000101160	ENSG00000101347		ENSG00000100209
ENSG00000100216	ENSG00000130227	ENSG00000101161	ENSG00000101349		ENSG00000100216
ENSG00000100219	ENSG00000130234	ENSG00000101166	ENSG00000101350		ENSG00000100219
ENSG00000100220	ENSG00000130294	ENSG00000101181	ENSG00000101361		ENSG00000100220
ENSG00000100221	ENSG00000130299	ENSG00000101182	ENSG00000101365		ENSG00000100221
ENSG00000100226	ENSG00000130332	ENSG00000101187	ENSG00000101367		ENSG00000100226
ENSG00000100228	ENSG00000130338	ENSG00000101194	ENSG00000101391		ENSG00000100228
ENSG00000100239	ENSG00000130348	ENSG00000101199	ENSG00000101405		ENSG00000100239
ENSG00000100241	ENSG00000130414	ENSG00000101204	ENSG00000101413		ENSG00000100241
ENSG00000100242	ENSG00000130508	ENSG00000101210	ENSG00000101417		ENSG00000100242
ENSG00000100243	ENSG00000130517	ENSG00000101224	ENSG00000101421		ENSG00000100243
ENSG00000100246	ENSG00000130520	ENSG00000101246	ENSG00000101425		ENSG00000100246
ENSG00000100253	ENSG00000130653	ENSG00000101247	ENSG00000101438		ENSG00000100253
ENSG00000100258	ENSG00000130702	ENSG00000101251	ENSG00000101439		ENSG00000100258
ENSG00000100266	ENSG00000130703	ENSG00000101266	ENSG00000101444		ENSG00000100266
ENSG00000100280	ENSG00000130706	ENSG00000101276	ENSG00000101445		ENSG00000100280
ENSG00000100284	ENSG00000130713	ENSG00000101278	ENSG00000101452		ENSG00000100284
ENSG00000100288	ENSG00000130731	ENSG00000101280	ENSG00000101457		ENSG00000100288
ENSG00000100294	ENSG00000130734	ENSG00000101294	ENSG00000101464		ENSG00000100294
ENSG00000100296	ENSG00000130764	ENSG00000101310	ENSG00000101473		ENSG00000100296
ENSG00000100297	ENSG00000130768	ENSG00000101311	ENSG00000101474		ENSG00000100297
ENSG00000100299	ENSG00000130772	ENSG00000101321	ENSG00000101489		ENSG00000100299
ENSG00000100300	ENSG00000130811	ENSG00000101323	ENSG00000101557		ENSG00000100300
ENSG00000100304	ENSG00000130939	ENSG00000101333	ENSG00000101558		ENSG00000100304
ENSG00000100314	ENSG00000130985	ENSG00000101335	ENSG00000101574		ENSG00000100314
ENSG00000100316	ENSG00000131013	ENSG00000101336	ENSG00000101577		ENSG00000100316
ENSG00000100320	ENSG00000131018	ENSG00000101337	ENSG00000101608		ENSG00000100320
ENSG00000100321	ENSG00000131043	ENSG00000101343	ENSG00000101654		ENSG00000100321
ENSG00000100324	ENSG00000131044	ENSG00000101346	ENSG00000101680		ENSG00000100324
ENSG00000100330	ENSG00000131051	ENSG00000101347	ENSG00000101752		ENSG00000100330
ENSG00000100341	ENSG00000131100	ENSG00000101349	ENSG00000101782		ENSG00000100341
ENSG00000100344	ENSG00000131153	ENSG00000101350	ENSG00000101811		ENSG00000100344
ENSG00000100346	ENSG00000131236	ENSG00000101361	ENSG00000101844		ENSG00000100346
ENSG00000100347	ENSG00000131238	ENSG00000101365	ENSG00000101846		ENSG00000100347
ENSG00000100348	ENSG00000131242	ENSG00000101367	ENSG00000101856		ENSG00000100348
ENSG00000100353	ENSG00000131269	ENSG00000101391	ENSG00000101868		ENSG00000100353
ENSG00000100359	ENSG00000131373	ENSG00000101400	ENSG00000101882		ENSG00000100359
ENSG00000100364	ENSG00000131374	ENSG00000101413	ENSG00000101888		ENSG00000100364
ENSG00000100379	ENSG00000131375	ENSG00000101417	ENSG00000101901		ENSG00000100379
ENSG00000100380	ENSG00000131381	ENSG00000101421	ENSG00000101911		ENSG00000100380
ENSG00000100387	ENSG00000131437	ENSG00000101425	ENSG00000101928		ENSG00000100387
ENSG00000100393	ENSG00000131446	ENSG00000101438	ENSG00000101935		ENSG00000100393
ENSG00000100395	ENSG00000131459	ENSG00000101439	ENSG00000101958		ENSG00000100395
ENSG00000100401	ENSG00000131467	ENSG00000101441	ENSG00000101972		ENSG00000100401
ENSG00000100410	ENSG00000131469	ENSG00000101444	ENSG00000101974		ENSG00000100410
ENSG00000100412	ENSG00000131508	ENSG00000101445	ENSG00000101977		ENSG00000100412
ENSG00000100413	ENSG00000131558	ENSG00000101446	ENSG00000101986		ENSG00000100413
ENSG00000100416	ENSG00000131626	ENSG00000101448	ENSG00000102001		ENSG00000100416
ENSG00000100417	ENSG00000131725	ENSG00000101452	ENSG00000102024		ENSG00000100417
ENSG00000100418	ENSG00000131747	ENSG00000101457	ENSG00000102030		ENSG00000100418
ENSG00000100422	ENSG00000131748	ENSG00000101460	ENSG00000102038		ENSG00000100422
ENSG00000100425	ENSG00000131979	ENSG00000101464	ENSG00000102043		ENSG00000100425
ENSG00000100426	ENSG00000132002	ENSG00000101473	ENSG00000102053		ENSG00000100426
ENSG00000100439	ENSG00000132130	ENSG00000101474	ENSG00000102054		ENSG00000100439
ENSG00000100441	ENSG00000132182	ENSG00000101489	ENSG00000102057		ENSG00000100441
ENSG00000100461	ENSG00000132254	ENSG00000101557	ENSG00000102100		ENSG00000100461
ENSG00000100462	ENSG00000132275	ENSG00000101558	ENSG00000102125		ENSG00000100462
ENSG00000100479	ENSG00000132294	ENSG00000101577	ENSG00000102144		ENSG00000100479
ENSG00000100483	ENSG00000132305	ENSG00000101608	ENSG00000102158		ENSG00000100483
ENSG00000100485	ENSG00000132323	ENSG00000101654	ENSG00000102189		ENSG00000100485
ENSG00000100490	ENSG00000132330	ENSG00000101680	ENSG00000102218		ENSG00000100490
ENSG00000100503	ENSG00000132341	ENSG00000101752	ENSG00000102221		ENSG00000100503
ENSG00000100504	ENSG00000132361	ENSG00000101782	ENSG00000102225		ENSG00000100504
ENSG00000100505	ENSG00000132394	ENSG00000101811	ENSG00000102226		ENSG00000100505
ENSG00000100519	ENSG00000132405	ENSG00000101843	ENSG00000102230		ENSG00000100519
ENSG00000100522	ENSG00000132423	ENSG00000101844	ENSG00000102241		ENSG00000100522
ENSG00000100523	ENSG00000132432	ENSG00000101846	ENSG00000102302		ENSG00000100523
ENSG00000100528	ENSG00000132467	ENSG00000101856	ENSG00000102309		ENSG00000100528
ENSG00000100554	ENSG00000132471	ENSG00000101868	ENSG00000102312		ENSG00000100554
ENSG00000100567	ENSG00000132485	ENSG00000101871	ENSG00000102317		ENSG00000100567
ENSG00000100568	ENSG00000132541	ENSG00000101882	ENSG00000102383		ENSG00000100568
ENSG00000100575	ENSG00000132563	ENSG00000101888	ENSG00000102385		ENSG00000100575
ENSG00000100577	ENSG00000132570	ENSG00000101892	ENSG00000102387		ENSG00000100577
ENSG00000100580	ENSG00000132581	ENSG00000101911	ENSG00000102390		ENSG00000100580
ENSG00000100591	ENSG00000132591	ENSG00000101928	ENSG00000102393		ENSG00000100591
ENSG00000100592	ENSG00000132603	ENSG00000101935	ENSG00000102452		ENSG00000100592
ENSG00000100599	ENSG00000132613	ENSG00000101972	ENSG00000102547		ENSG00000100599
ENSG00000100600	ENSG00000132664	ENSG00000101986	ENSG00000102554		ENSG00000100600
ENSG00000100601	ENSG00000132676	ENSG00000101997	ENSG00000102572		ENSG00000100601
ENSG00000100603	ENSG00000132763	ENSG00000102001	ENSG00000102575		ENSG00000100603
ENSG00000100612	ENSG00000132773	ENSG00000102003	ENSG00000102580		ENSG00000100612
ENSG00000100614	ENSG00000132780	ENSG00000102030	ENSG00000102595		ENSG00000100614
ENSG00000100626	ENSG00000132792	ENSG00000102038	ENSG00000102606		ENSG00000100626
ENSG00000100628	ENSG00000132837	ENSG00000102043	ENSG00000102738		ENSG00000100628
ENSG00000100632	ENSG00000132912	ENSG00000102053	ENSG00000102743		ENSG00000100632
ENSG00000100644	ENSG00000132953	ENSG00000102054	ENSG00000102753		ENSG00000100644
ENSG00000100650	ENSG00000132964	ENSG00000102057	ENSG00000102763		ENSG00000100650
ENSG00000100652	ENSG00000132970	ENSG00000102069	ENSG00000102780		ENSG00000100652
ENSG00000100664	ENSG00000133026	ENSG00000102096	ENSG00000102781		ENSG00000100664
ENSG00000100678	ENSG00000133030	ENSG00000102103	ENSG00000102786		ENSG00000100678
ENSG00000100697	ENSG00000133063	ENSG00000102125	ENSG00000102804		ENSG00000100697
ENSG00000100711	ENSG00000133065	ENSG00000102144	ENSG00000102858		ENSG00000100711
ENSG00000100714	ENSG00000133069	ENSG00000102145	ENSG00000102870		ENSG00000100714
ENSG00000100722	ENSG00000133104	ENSG00000102158	ENSG00000102879		ENSG00000100722
ENSG00000100726	ENSG00000133107	ENSG00000102189	ENSG00000102882		ENSG00000100726
ENSG00000100731	ENSG00000133114	ENSG00000102218	ENSG00000102890		ENSG00000100731
ENSG00000100744	ENSG00000133119	ENSG00000102221	ENSG00000102898		ENSG00000100744
ENSG00000100749	ENSG00000133121	ENSG00000102225	ENSG00000102900		ENSG00000100749
ENSG00000100764	ENSG00000133195	ENSG00000102226	ENSG00000102910		ENSG00000100764
ENSG00000100767	ENSG00000133226	ENSG00000102230	ENSG00000102967		ENSG00000100767
ENSG00000100784	ENSG00000133243	ENSG00000102265	ENSG00000102978		ENSG00000100784
ENSG00000100796	ENSG00000133313	ENSG00000102302	ENSG00000102996		ENSG00000100796
ENSG00000100804	ENSG00000133316	ENSG00000102309	ENSG00000103018		ENSG00000100804
ENSG00000100813	ENSG00000133398	ENSG00000102312	ENSG00000103024		ENSG00000100813
ENSG00000100815	ENSG00000133597	ENSG00000102317	ENSG00000103035		ENSG00000100815
ENSG00000100823	ENSG00000133606	ENSG00000102383	ENSG00000103043		ENSG00000100823
ENSG00000100829	ENSG00000133703	ENSG00000102387	ENSG00000103051		ENSG00000100829
ENSG00000100836	ENSG00000133731	ENSG00000102390	ENSG00000103064		ENSG00000100836
ENSG00000100852	ENSG00000133812	ENSG00000102393	ENSG00000103066		ENSG00000100852
ENSG00000100867	ENSG00000133835	ENSG00000102445	ENSG00000103067		ENSG00000100867
ENSG00000100883	ENSG00000133872	ENSG00000102452	ENSG00000103089		ENSG00000100883
ENSG00000100884	ENSG00000133997	ENSG00000102531	ENSG00000103121		ENSG00000100884
ENSG00000100888	ENSG00000134001	ENSG00000102547	ENSG00000103148		ENSG00000100888
ENSG00000100889	ENSG00000134014	ENSG00000102572	ENSG00000103150		ENSG00000100889
ENSG00000100897	ENSG00000134072	ENSG00000102575	ENSG00000103160		ENSG00000100897
ENSG00000100902	ENSG00000134077	ENSG00000102580	ENSG00000103184		ENSG00000100902
ENSG00000100908	ENSG00000134146	ENSG00000102595	ENSG00000103196		ENSG00000100908
ENSG00000100911	ENSG00000134153	ENSG00000102606	ENSG00000103202		ENSG00000100911
ENSG00000100931	ENSG00000134160	ENSG00000102683	ENSG00000103222		ENSG00000100931
ENSG00000100934	ENSG00000134186	ENSG00000102743	ENSG00000103226		ENSG00000100934
ENSG00000100938	ENSG00000134198	ENSG00000102753	ENSG00000103245		ENSG00000100938
ENSG00000100941	ENSG00000134215	ENSG00000102755	ENSG00000103249		ENSG00000100941
ENSG00000100949	ENSG00000134265	ENSG00000102763	ENSG00000103254		ENSG00000100949
ENSG00000100983	ENSG00000134313	ENSG00000102780	ENSG00000103257		ENSG00000100983
ENSG00000100994	ENSG00000134318	ENSG00000102781	ENSG00000103266		ENSG00000100994
ENSG00000100997	ENSG00000134333	ENSG00000102786	ENSG00000103274		ENSG00000100997
ENSG00000101003	ENSG00000134371	ENSG00000102804	ENSG00000103275		ENSG00000101003
ENSG00000101004	ENSG00000134419	ENSG00000102858	ENSG00000103319		ENSG00000101004
ENSG00000101019	ENSG00000134453	ENSG00000102870	ENSG00000103326		ENSG00000101019
ENSG00000101040	ENSG00000134463	ENSG00000102879	ENSG00000103335		ENSG00000101040
ENSG00000101049	ENSG00000134480	ENSG00000102882	ENSG00000103342		ENSG00000101049
ENSG00000101052	ENSG00000134597	ENSG00000102890	ENSG00000103351		ENSG00000101052
ENSG00000101057	ENSG00000134697	ENSG00000102893	ENSG00000103356		ENSG00000101057
ENSG00000101074	ENSG00000134709	ENSG00000102898	ENSG00000103363		ENSG00000101074
ENSG00000101076	ENSG00000134716	ENSG00000102900	ENSG00000103375		ENSG00000101076
ENSG00000101079	ENSG00000134717	ENSG00000102934	ENSG00000103423		ENSG00000101079
ENSG00000101084	ENSG00000134748	ENSG00000102935	ENSG00000103449		ENSG00000101084
ENSG00000101098	ENSG00000134769	ENSG00000102967	ENSG00000103472		ENSG00000101098
ENSG00000101109	ENSG00000134809	ENSG00000102978	ENSG00000103479		ENSG00000101109
ENSG00000101132	ENSG00000134815	ENSG00000102981	ENSG00000103489		ENSG00000101132
ENSG00000101138	ENSG00000134851	ENSG00000102996	ENSG00000103494		ENSG00000101138
ENSG00000101144	ENSG00000134900	ENSG00000103018	ENSG00000103502		ENSG00000101144
ENSG00000101146	ENSG00000134970	ENSG00000103034	ENSG00000103510		ENSG00000101146
ENSG00000101150	ENSG00000134996	ENSG00000103035	ENSG00000103512		ENSG00000101150
ENSG00000101152	ENSG00000135002	ENSG00000103043	ENSG00000103544		ENSG00000101152
ENSG00000101160	ENSG00000135018	ENSG00000103051	ENSG00000103546		ENSG00000101160
ENSG00000101161	ENSG00000135040	ENSG00000103066	ENSG00000103549		ENSG00000101161
ENSG00000101162	ENSG00000135069	ENSG00000103067	ENSG00000103569		ENSG00000101162
ENSG00000101166	ENSG00000135070	ENSG00000103089	ENSG00000103642		ENSG00000101166
ENSG00000101181	ENSG00000135074	ENSG00000103111	ENSG00000103647		ENSG00000101181
ENSG00000101182	ENSG00000135093	ENSG00000103121	ENSG00000103653		ENSG00000101182
ENSG00000101187	ENSG00000135119	ENSG00000103148	ENSG00000103671		ENSG00000101187
ENSG00000101193	ENSG00000135241	ENSG00000103150	ENSG00000103710		ENSG00000101193
ENSG00000101194	ENSG00000135297	ENSG00000103184	ENSG00000103723		ENSG00000101194
ENSG00000101199	ENSG00000135317	ENSG00000103199	ENSG00000103740		ENSG00000101199
ENSG00000101213	ENSG00000135341	ENSG00000103222	ENSG00000103769		ENSG00000101213
ENSG00000101216	ENSG00000135404	ENSG00000103226	ENSG00000103876		ENSG00000101216
ENSG00000101224	ENSG00000135414	ENSG00000103241	ENSG00000103966		ENSG00000101224
ENSG00000101236	ENSG00000135424	ENSG00000103245	ENSG00000103978		ENSG00000101236
ENSG00000101246	ENSG00000135441	ENSG00000103249	ENSG00000104043		ENSG00000101246
ENSG00000101247	ENSG00000135469	ENSG00000103257	ENSG00000104067		ENSG00000101247
ENSG00000101251	ENSG00000135472	ENSG00000103266	ENSG00000104093		ENSG00000101251
ENSG00000101255	ENSG00000135521	ENSG00000103269	ENSG00000104129		ENSG00000101255
ENSG00000101266	ENSG00000135537	ENSG00000103274	ENSG00000104131		ENSG00000101266
ENSG00000101276	ENSG00000135587	ENSG00000103275	ENSG00000104142		ENSG00000101276
ENSG00000101278	ENSG00000135624	ENSG00000103313	ENSG00000104154		ENSG00000101278
ENSG00000101290	ENSG00000135636	ENSG00000103319	ENSG00000104177		ENSG00000101290
ENSG00000101292	ENSG00000135697	ENSG00000103326	ENSG00000104205		ENSG00000101292
ENSG00000101294	ENSG00000135720	ENSG00000103335	ENSG00000104237		ENSG00000101294
ENSG00000101306	ENSG00000135723	ENSG00000103343	ENSG00000104267		ENSG00000101306
ENSG00000101310	ENSG00000135750	ENSG00000103351	ENSG00000104299		ENSG00000101310
ENSG00000101311	ENSG00000135773	ENSG00000103355	ENSG00000104313		ENSG00000101311
ENSG00000101321	ENSG00000135775	ENSG00000103356	ENSG00000104321		ENSG00000101321
ENSG00000101323	ENSG00000135776	ENSG00000103363	ENSG00000104325		ENSG00000101323
ENSG00000101333	ENSG00000135821	ENSG00000103365	ENSG00000104331		ENSG00000101333
ENSG00000101336	ENSG00000135829	ENSG00000103375	ENSG00000104343		ENSG00000101336
ENSG00000101337	ENSG00000135845	ENSG00000103423	ENSG00000104356		ENSG00000101337
ENSG00000101342	ENSG00000135847	ENSG00000103449	ENSG00000104369		ENSG00000101342
ENSG00000101343	ENSG00000135862	ENSG00000103479	ENSG00000104375		ENSG00000101343
ENSG00000101346	ENSG00000135912	ENSG00000103489	ENSG00000104388		ENSG00000101346
ENSG00000101347	ENSG00000135932	ENSG00000103494	ENSG00000104408		ENSG00000101347
ENSG00000101349	ENSG00000135968	ENSG00000103502	ENSG00000104412		ENSG00000101349
ENSG00000101350	ENSG00000135999	ENSG00000103510	ENSG00000104413		ENSG00000101350
ENSG00000101361	ENSG00000136003	ENSG00000103512	ENSG00000104419		ENSG00000101361
ENSG00000101365	ENSG00000136010	ENSG00000103544	ENSG00000104427		ENSG00000101365
ENSG00000101367	ENSG00000136045	ENSG00000103546	ENSG00000104517		ENSG00000101367
ENSG00000101391	ENSG00000136051	ENSG00000103549	ENSG00000104522		ENSG00000101391
ENSG00000101400	ENSG00000136152	ENSG00000103569	ENSG00000104524		ENSG00000101400
ENSG00000101412	ENSG00000136153	ENSG00000103642	ENSG00000104529		ENSG00000101412
ENSG00000101413	ENSG00000136167	ENSG00000103653	ENSG00000104537		ENSG00000101413
ENSG00000101417	ENSG00000136197	ENSG00000103671	ENSG00000104611		ENSG00000101417
ENSG00000101421	ENSG00000136267	ENSG00000103710	ENSG00000104626		ENSG00000101421
ENSG00000101438	ENSG00000136273	ENSG00000103723	ENSG00000104635		ENSG00000101438
ENSG00000101444	ENSG00000136279	ENSG00000103769	ENSG00000104643		ENSG00000101444
ENSG00000101445	ENSG00000136371	ENSG00000103832	ENSG00000104660		ENSG00000101445
ENSG00000101448	ENSG00000136379	ENSG00000103876	ENSG00000104671		ENSG00000101448
ENSG00000101452	ENSG00000136450	ENSG00000103966	ENSG00000104687		ENSG00000101452
ENSG00000101457	ENSG00000136463	ENSG00000103978	ENSG00000104695		ENSG00000101457
ENSG00000101460	ENSG00000136485	ENSG00000104043	ENSG00000104723		ENSG00000101460
ENSG00000101464	ENSG00000136492	ENSG00000104047	ENSG00000104738		ENSG00000101464
ENSG00000101473	ENSG00000136527	ENSG00000104129	ENSG00000104763		ENSG00000101473
ENSG00000101474	ENSG00000136636	ENSG00000104142	ENSG00000104774		ENSG00000101474
ENSG00000101557	ENSG00000136717	ENSG00000104177	ENSG00000104812		ENSG00000101557
ENSG00000101558	ENSG00000136718	ENSG00000104205	ENSG00000104814		ENSG00000101558
ENSG00000101574	ENSG00000136770	ENSG00000104219	ENSG00000104823		ENSG00000101574
ENSG00000101577	ENSG00000136807	ENSG00000104228	ENSG00000104824		ENSG00000101577
ENSG00000101654	ENSG00000136813	ENSG00000104267	ENSG00000104833		ENSG00000101654
ENSG00000101665	ENSG00000136827	ENSG00000104290	ENSG00000104835		ENSG00000101665
ENSG00000101752	ENSG00000136842	ENSG00000104299	ENSG00000104852		ENSG00000101752
ENSG00000101782	ENSG00000136854	ENSG00000104313	ENSG00000104853		ENSG00000101782
ENSG00000101811	ENSG00000136868	ENSG00000104321	ENSG00000104859		ENSG00000101811
ENSG00000101812	ENSG00000136875	ENSG00000104325	ENSG00000104863		ENSG00000101812
ENSG00000101825	ENSG00000136877	ENSG00000104331	ENSG00000104866		ENSG00000101825
ENSG00000101843	ENSG00000136888	ENSG00000104332	ENSG00000104872		ENSG00000101843
ENSG00000101844	ENSG00000136936	ENSG00000104343	ENSG00000104879		ENSG00000101844
ENSG00000101846	ENSG00000136937	ENSG00000104356	ENSG00000104883		ENSG00000101846
ENSG00000101856	ENSG00000136940	ENSG00000104369	ENSG00000104884		ENSG00000101856
ENSG00000101868	ENSG00000136942	ENSG00000104375	ENSG00000104885		ENSG00000101868
ENSG00000101882	ENSG00000136943	ENSG00000104408	ENSG00000104888		ENSG00000101882
ENSG00000101888	ENSG00000136944	ENSG00000104412	ENSG00000104889		ENSG00000101888
ENSG00000101890	ENSG00000136982	ENSG00000104413	ENSG00000104897		ENSG00000101890
ENSG00000101892	ENSG00000136986	ENSG00000104419	ENSG00000104907		ENSG00000101892
ENSG00000101928	ENSG00000137145	ENSG00000104427	ENSG00000104915		ENSG00000101928
ENSG00000101935	ENSG00000137154	ENSG00000104442	ENSG00000104946		ENSG00000101935
ENSG00000101945	ENSG00000137161	ENSG00000104472	ENSG00000104957		ENSG00000101945
ENSG00000101958	ENSG00000137168	ENSG00000104517	ENSG00000104967		ENSG00000101958
ENSG00000101972	ENSG00000137177	ENSG00000104522	ENSG00000104969		ENSG00000101972
ENSG00000101977	ENSG00000137193	ENSG00000104611	ENSG00000104980		ENSG00000101977
ENSG00000101986	ENSG00000137198	ENSG00000104635	ENSG00000105011		ENSG00000101986
ENSG00000101997	ENSG00000137200	ENSG00000104643	ENSG00000105058		ENSG00000101997
ENSG00000102001	ENSG00000137207	ENSG00000104660	ENSG00000105135		ENSG00000102001
ENSG00000102003	ENSG00000137274	ENSG00000104671	ENSG00000105137		ENSG00000102003
ENSG00000102024	ENSG00000137285	ENSG00000104687	ENSG00000105143		ENSG00000102024
ENSG00000102030	ENSG00000137486	ENSG00000104695	ENSG00000105146		ENSG00000102030
ENSG00000102038	ENSG00000137502	ENSG00000104723	ENSG00000105171		ENSG00000102038
ENSG00000102043	ENSG00000137509	ENSG00000104728	ENSG00000105173		ENSG00000102043
ENSG00000102053	ENSG00000137522	ENSG00000104738	ENSG00000105185		ENSG00000102053
ENSG00000102054	ENSG00000137573	ENSG00000104755	ENSG00000105193		ENSG00000102054
ENSG00000102057	ENSG00000137628	ENSG00000104760	ENSG00000105197		ENSG00000102057
ENSG00000102069	ENSG00000137656	ENSG00000104763	ENSG00000105202		ENSG00000102069
ENSG00000102080	ENSG00000137672	ENSG00000104765	ENSG00000105204		ENSG00000102080
ENSG00000102096	ENSG00000137767	ENSG00000104774	ENSG00000105216		ENSG00000102096
ENSG00000102100	ENSG00000137807	ENSG00000104805	ENSG00000105220		ENSG00000102100
ENSG00000102103	ENSG00000137815	ENSG00000104812	ENSG00000105221		ENSG00000102103
ENSG00000102125	ENSG00000137818	ENSG00000104823	ENSG00000105223		ENSG00000102125
ENSG00000102128	ENSG00000137876	ENSG00000104824	ENSG00000105227		ENSG00000102128
ENSG00000102144	ENSG00000137877	ENSG00000104833	ENSG00000105245		ENSG00000102144
ENSG00000102145	ENSG00000137942	ENSG00000104835	ENSG00000105248		ENSG00000102145
ENSG00000102158	ENSG00000137944	ENSG00000104848	ENSG00000105254		ENSG00000102158
ENSG00000102172	ENSG00000137947	ENSG00000104852	ENSG00000105258		ENSG00000102172
ENSG00000102174	ENSG00000137992	ENSG00000104853	ENSG00000105281		ENSG00000102174
ENSG00000102178	ENSG00000138002	ENSG00000104859	ENSG00000105287		ENSG00000102178
ENSG00000102218	ENSG00000138018	ENSG00000104863	ENSG00000105289		ENSG00000102218
ENSG00000102221	ENSG00000138029	ENSG00000104866	ENSG00000105298		ENSG00000102221
ENSG00000102225	ENSG00000138035	ENSG00000104872	ENSG00000105323		ENSG00000102225
ENSG00000102226	ENSG00000138036	ENSG00000104879	ENSG00000105325		ENSG00000102226
ENSG00000102230	ENSG00000138039	ENSG00000104883	ENSG00000105341		ENSG00000102230
ENSG00000102241	ENSG00000138069	ENSG00000104884	ENSG00000105357		ENSG00000102241
ENSG00000102271	ENSG00000138079	ENSG00000104885	ENSG00000105364		ENSG00000102271
ENSG00000102290	ENSG00000138081	ENSG00000104888	ENSG00000105372		ENSG00000102290
ENSG00000102302	ENSG00000138111	ENSG00000104889	ENSG00000105373		ENSG00000102302
ENSG00000102309	ENSG00000138160	ENSG00000104894	ENSG00000105379		ENSG00000102309
ENSG00000102312	ENSG00000138175	ENSG00000104907	ENSG00000105392		ENSG00000102312
ENSG00000102317	ENSG00000138193	ENSG00000104957	ENSG00000105401		ENSG00000102317
ENSG00000102349	ENSG00000138231	ENSG00000104967	ENSG00000105402		ENSG00000102349
ENSG00000102383	ENSG00000138246	ENSG00000104969	ENSG00000105409		ENSG00000102383
ENSG00000102385	ENSG00000138279	ENSG00000104980	ENSG00000105426		ENSG00000102385
ENSG00000102387	ENSG00000138346	ENSG00000105011	ENSG00000105438		ENSG00000102387
ENSG00000102390	ENSG00000138381	ENSG00000105058	ENSG00000105443		ENSG00000102390
ENSG00000102393	ENSG00000138385	ENSG00000105131	ENSG00000105447		ENSG00000102393
ENSG00000102445	ENSG00000138395	ENSG00000105132	ENSG00000105464		ENSG00000102445
ENSG00000102452	ENSG00000138398	ENSG00000105135	ENSG00000105486		ENSG00000102452
ENSG00000102468	ENSG00000138430	ENSG00000105146	ENSG00000105497		ENSG00000102468
ENSG00000102531	ENSG00000138442	ENSG00000105171	ENSG00000105552		ENSG00000102531
ENSG00000102547	ENSG00000138443	ENSG00000105173	ENSG00000105568		ENSG00000102547
ENSG00000102572	ENSG00000138604	ENSG00000105176	ENSG00000105576		ENSG00000102572
ENSG00000102575	ENSG00000138621	ENSG00000105185	ENSG00000105583		ENSG00000102575
ENSG00000102580	ENSG00000138668	ENSG00000105193	ENSG00000105607		ENSG00000102580
ENSG00000102595	ENSG00000138670	ENSG00000105197	ENSG00000105612		ENSG00000102595
ENSG00000102606	ENSG00000138686	ENSG00000105202	ENSG00000105613		ENSG00000102606
ENSG00000102678	ENSG00000138688	ENSG00000105204	ENSG00000105617		ENSG00000102678
ENSG00000102683	ENSG00000138744	ENSG00000105216	ENSG00000105618		ENSG00000102683
ENSG00000102743	ENSG00000138750	ENSG00000105220	ENSG00000105640		ENSG00000102743
ENSG00000102753	ENSG00000138758	ENSG00000105221	ENSG00000105642		ENSG00000102753
ENSG00000102763	ENSG00000138792	ENSG00000105223	ENSG00000105643		ENSG00000102763
ENSG00000102780	ENSG00000138796	ENSG00000105245	ENSG00000105647		ENSG00000102780
ENSG00000102781	ENSG00000138802	ENSG00000105248	ENSG00000105649		ENSG00000102781
ENSG00000102786	ENSG00000138814	ENSG00000105254	ENSG00000105650		ENSG00000102786
ENSG00000102796	ENSG00000138942	ENSG00000105258	ENSG00000105655		ENSG00000102796
ENSG00000102804	ENSG00000139116	ENSG00000105278	ENSG00000105669		ENSG00000102804
ENSG00000102837	ENSG00000139160	ENSG00000105287	ENSG00000105671		ENSG00000102837
ENSG00000102858	ENSG00000139163	ENSG00000105289	ENSG00000105675		ENSG00000102858
ENSG00000102878	ENSG00000139180	ENSG00000105290	ENSG00000105677		ENSG00000102878
ENSG00000102879	ENSG00000139197	ENSG00000105298	ENSG00000105679		ENSG00000102879
ENSG00000102882	ENSG00000139287	ENSG00000105323	ENSG00000105700		ENSG00000102882
ENSG00000102890	ENSG00000139343	ENSG00000105325	ENSG00000105708		ENSG00000102890
ENSG00000102893	ENSG00000139344	ENSG00000105329	ENSG00000105723		ENSG00000102893
ENSG00000102898	ENSG00000139428	ENSG00000105341	ENSG00000105726		ENSG00000102898
ENSG00000102900	ENSG00000139433	ENSG00000105357	ENSG00000105737		ENSG00000102900
ENSG00000102910	ENSG00000139436	ENSG00000105364	ENSG00000105738		ENSG00000102910
ENSG00000102921	ENSG00000139624	ENSG00000105372	ENSG00000105750		ENSG00000102921
ENSG00000102935	ENSG00000139636	ENSG00000105373	ENSG00000105755		ENSG00000102935
ENSG00000102967	ENSG00000139637	ENSG00000105379	ENSG00000105771		ENSG00000102967
ENSG00000102974	ENSG00000139668	ENSG00000105392	ENSG00000105778		ENSG00000102974
ENSG00000102978	ENSG00000139684	ENSG00000105398	ENSG00000105793		ENSG00000102978
ENSG00000102981	ENSG00000139722	ENSG00000105401	ENSG00000105810		ENSG00000102981
ENSG00000103024	ENSG00000139726	ENSG00000105402	ENSG00000105819		ENSG00000103024
ENSG00000103034	ENSG00000139746	ENSG00000105409	ENSG00000105821		ENSG00000103034
ENSG00000103035	ENSG00000139908	ENSG00000105419	ENSG00000105825		ENSG00000103035
ENSG00000103043	ENSG00000139910	ENSG00000105428	ENSG00000105829		ENSG00000103043
ENSG00000103047	ENSG00000139921	ENSG00000105438	ENSG00000105851		ENSG00000103047
ENSG00000103051	ENSG00000139946	ENSG00000105443	ENSG00000105852		ENSG00000103051
ENSG00000103061	ENSG00000139988	ENSG00000105447	ENSG00000105854		ENSG00000103061
ENSG00000103064	ENSG00000140015	ENSG00000105464	ENSG00000105865		ENSG00000103064
ENSG00000103066	ENSG00000140043	ENSG00000105467	ENSG00000105866		ENSG00000103066
ENSG00000103067	ENSG00000140199	ENSG00000105486	ENSG00000105875		ENSG00000103067
ENSG00000103089	ENSG00000140254	ENSG00000105497	ENSG00000105877		ENSG00000103089
ENSG00000103111	ENSG00000140263	ENSG00000105520	ENSG00000105880		ENSG00000103111
ENSG00000103121	ENSG00000140279	ENSG00000105552	ENSG00000105887		ENSG00000103121
ENSG00000103148	ENSG00000140297	ENSG00000105556	ENSG00000105929		ENSG00000103148
ENSG00000103150	ENSG00000140307	ENSG00000105568	ENSG00000105948		ENSG00000103150
ENSG00000103160	ENSG00000140367	ENSG00000105576	ENSG00000105953		ENSG00000103160
ENSG00000103184	ENSG00000140374	ENSG00000105583	ENSG00000105968		ENSG00000103184
ENSG00000103196	ENSG00000140443	ENSG00000105605	ENSG00000105974		ENSG00000103196
ENSG00000103197	ENSG00000140451	ENSG00000105607	ENSG00000105976		ENSG00000103197
ENSG00000103202	ENSG00000140463	ENSG00000105610	ENSG00000105983		ENSG00000103202
ENSG00000103222	ENSG00000140564	ENSG00000105612	ENSG00000105991		ENSG00000103222
ENSG00000103226	ENSG00000140600	ENSG00000105613	ENSG00000105993		ENSG00000103226
ENSG00000103227	ENSG00000140650	ENSG00000105617	ENSG00000106004		ENSG00000103227
ENSG00000103241	ENSG00000140750	ENSG00000105618	ENSG00000106028		ENSG00000103241
ENSG00000103245	ENSG00000140829	ENSG00000105640	ENSG00000106038		ENSG00000103245
ENSG00000103249	ENSG00000140905	ENSG00000105641	ENSG00000106049		ENSG00000103249
ENSG00000103253	ENSG00000140988	ENSG00000105642	ENSG00000106066		ENSG00000103253
ENSG00000103254	ENSG00000140990	ENSG00000105643	ENSG00000106069		ENSG00000103254
ENSG00000103266	ENSG00000140992	ENSG00000105647	ENSG00000106077		ENSG00000103266
ENSG00000103274	ENSG00000140995	ENSG00000105649	ENSG00000106080		ENSG00000103274
ENSG00000103275	ENSG00000141002	ENSG00000105650	ENSG00000106086		ENSG00000103275
ENSG00000103319	ENSG00000141101	ENSG00000105655	ENSG00000106089		ENSG00000103319
ENSG00000103326	ENSG00000141127	ENSG00000105662	ENSG00000106105		ENSG00000103326
ENSG00000103335	ENSG00000141141	ENSG00000105669	ENSG00000106113		ENSG00000103335
ENSG00000103342	ENSG00000141161	ENSG00000105671	ENSG00000106123		ENSG00000103342
ENSG00000103351	ENSG00000141279	ENSG00000105677	ENSG00000106153		ENSG00000103351
ENSG00000103356	ENSG00000141367	ENSG00000105700	ENSG00000106245		ENSG00000103356
ENSG00000103363	ENSG00000141376	ENSG00000105708	ENSG00000106258		ENSG00000103363
ENSG00000103365	ENSG00000141385	ENSG00000105717	ENSG00000106261		ENSG00000103365
ENSG00000103375	ENSG00000141425	ENSG00000105723	ENSG00000106263		ENSG00000103375
ENSG00000103423	ENSG00000141429	ENSG00000105726	ENSG00000106290		ENSG00000103423
ENSG00000103426	ENSG00000141452	ENSG00000105732	ENSG00000106299		ENSG00000103426
ENSG00000103460	ENSG00000141458	ENSG00000105738	ENSG00000106344		ENSG00000103460
ENSG00000103472	ENSG00000141485	ENSG00000105750	ENSG00000106346		ENSG00000103472
ENSG00000103489	ENSG00000141503	ENSG00000105755	ENSG00000106348		ENSG00000103489
ENSG00000103494	ENSG00000141504	ENSG00000105778	ENSG00000106355		ENSG00000103494
ENSG00000103502	ENSG00000141522	ENSG00000105793	ENSG00000106367		ENSG00000103502
ENSG00000103510	ENSG00000141540	ENSG00000105808	ENSG00000106392		ENSG00000103510
ENSG00000103512	ENSG00000141543	ENSG00000105819	ENSG00000106397		ENSG00000103512
ENSG00000103528	ENSG00000141560	ENSG00000105821	ENSG00000106400		ENSG00000103528
ENSG00000103534	ENSG00000141627	ENSG00000105825	ENSG00000106443		ENSG00000103534
ENSG00000103544	ENSG00000141720	ENSG00000105851	ENSG00000106462		ENSG00000103544
ENSG00000103546	ENSG00000141837	ENSG00000105852	ENSG00000106546		ENSG00000103546
ENSG00000103549	ENSG00000141994	ENSG00000105854	ENSG00000106588		ENSG00000103549
ENSG00000103569	ENSG00000142002	ENSG00000105865	ENSG00000106591		ENSG00000103569
ENSG00000103642	ENSG00000142168	ENSG00000105866	ENSG00000106615		ENSG00000103642
ENSG00000103647	ENSG00000142186	ENSG00000105880	ENSG00000106617		ENSG00000103647
ENSG00000103653	ENSG00000142192	ENSG00000105887	ENSG00000106628		ENSG00000103653
ENSG00000103657	ENSG00000142207	ENSG00000105929	ENSG00000106633		ENSG00000103657
ENSG00000103671	ENSG00000142208	ENSG00000105948	ENSG00000106636		ENSG00000103671
ENSG00000103710	ENSG00000142230	ENSG00000105953	ENSG00000106638		ENSG00000103710
ENSG00000103723	ENSG00000142507	ENSG00000105967	ENSG00000106682		ENSG00000103723
ENSG00000103769	ENSG00000142534	ENSG00000105968	ENSG00000106688		ENSG00000103769
ENSG00000103876	ENSG00000142541	ENSG00000105974	ENSG00000106692		ENSG00000103876
ENSG00000103966	ENSG00000142546	ENSG00000105983	ENSG00000106714		ENSG00000103966
ENSG00000103978	ENSG00000142657	ENSG00000105991	ENSG00000106771		ENSG00000103978
ENSG00000104043	ENSG00000142676	ENSG00000105993	ENSG00000106789		ENSG00000104043
ENSG00000104047	ENSG00000142684	ENSG00000106004	ENSG00000106799		ENSG00000104047
ENSG00000104067	ENSG00000142798	ENSG00000106006	ENSG00000106803		ENSG00000104067
ENSG00000104093	ENSG00000142864	ENSG00000106028	ENSG00000106829		ENSG00000104093
ENSG00000104129	ENSG00000142910	ENSG00000106049	ENSG00000106852		ENSG00000104129
ENSG00000104140	ENSG00000142937	ENSG00000106069	ENSG00000106853		ENSG00000104140
ENSG00000104142	ENSG00000142959	ENSG00000106077	ENSG00000106976		ENSG00000104142
ENSG00000104154	ENSG00000143032	ENSG00000106080	ENSG00000106992		ENSG00000104154
ENSG00000104177	ENSG00000143106	ENSG00000106089	ENSG00000107021		ENSG00000104177
ENSG00000104205	ENSG00000143149	ENSG00000106105	ENSG00000107036		ENSG00000104205
ENSG00000104219	ENSG00000143155	ENSG00000106113	ENSG00000107077		ENSG00000104219
ENSG00000104237	ENSG00000143157	ENSG00000106123	ENSG00000107099		ENSG00000104237
ENSG00000104267	ENSG00000143158	ENSG00000106144	ENSG00000107104		ENSG00000104267
ENSG00000104299	ENSG00000143183	ENSG00000106153	ENSG00000107105		ENSG00000104299
ENSG00000104313	ENSG00000143222	ENSG00000106211	ENSG00000107130		ENSG00000104313
ENSG00000104321	ENSG00000143303	ENSG00000106245	ENSG00000107147		ENSG00000104321
ENSG00000104325	ENSG00000143315	ENSG00000106258	ENSG00000107185		ENSG00000104325
ENSG00000104331	ENSG00000143318	ENSG00000106261	ENSG00000107186		ENSG00000104331
ENSG00000104343	ENSG00000143324	ENSG00000106263	ENSG00000107187		ENSG00000104343
ENSG00000104356	ENSG00000143333	ENSG00000106290	ENSG00000107201		ENSG00000104356
ENSG00000104361	ENSG00000143341	ENSG00000106299	ENSG00000107223		ENSG00000104361
ENSG00000104365	ENSG00000143344	ENSG00000106302	ENSG00000107242		ENSG00000104365
ENSG00000104375	ENSG00000143376	ENSG00000106304	ENSG00000107262		ENSG00000104375
ENSG00000104388	ENSG00000143393	ENSG00000106330	ENSG00000107263		ENSG00000104388
ENSG00000104408	ENSG00000143409	ENSG00000106333	ENSG00000107281		ENSG00000104408
ENSG00000104412	ENSG00000143416	ENSG00000106344	ENSG00000107282		ENSG00000104412
ENSG00000104413	ENSG00000143437	ENSG00000106348	ENSG00000107295		ENSG00000104413
ENSG00000104419	ENSG00000143515	ENSG00000106355	ENSG00000107331		ENSG00000104419
ENSG00000104427	ENSG00000143549	ENSG00000106366	ENSG00000107338		ENSG00000104427
ENSG00000104517	ENSG00000143570	ENSG00000106367	ENSG00000107341		ENSG00000104517
ENSG00000104522	ENSG00000143621	ENSG00000106392	ENSG00000107362		ENSG00000104522
ENSG00000104524	ENSG00000143641	ENSG00000106397	ENSG00000107371		ENSG00000104524
ENSG00000104529	ENSG00000143653	ENSG00000106400	ENSG00000107372		ENSG00000104529
ENSG00000104537	ENSG00000143748	ENSG00000106443	ENSG00000107404		ENSG00000104537
ENSG00000104611	ENSG00000143751	ENSG00000106462	ENSG00000107438		ENSG00000104611
ENSG00000104626	ENSG00000143753	ENSG00000106524	ENSG00000107485		ENSG00000104626
ENSG00000104635	ENSG00000143761	ENSG00000106588	ENSG00000107518		ENSG00000104635
ENSG00000104643	ENSG00000143776	ENSG00000106591	ENSG00000107537		ENSG00000104643
ENSG00000104660	ENSG00000143799	ENSG00000106615	ENSG00000107554		ENSG00000104660
ENSG00000104671	ENSG00000143819	ENSG00000106617	ENSG00000107566		ENSG00000104671
ENSG00000104687	ENSG00000143862	ENSG00000106628	ENSG00000107581		ENSG00000104687
ENSG00000104695	ENSG00000143870	ENSG00000106633	ENSG00000107593		ENSG00000104695
ENSG00000104723	ENSG00000143952	ENSG00000106635	ENSG00000107611		ENSG00000104723
ENSG00000104738	ENSG00000143977	ENSG00000106636	ENSG00000107643		ENSG00000104738
ENSG00000104755	ENSG00000143995	ENSG00000106638	ENSG00000107669		ENSG00000104755
ENSG00000104756	ENSG00000144021	ENSG00000106689	ENSG00000107731		ENSG00000104756
ENSG00000104763	ENSG00000144034	ENSG00000106692	ENSG00000107736		ENSG00000104763
ENSG00000104774	ENSG00000144036	ENSG00000106714	ENSG00000107745		ENSG00000104774
ENSG00000104783	ENSG00000144040	ENSG00000106733	ENSG00000107758		ENSG00000104783
ENSG00000104804	ENSG00000144048	ENSG00000106771	ENSG00000107779		ENSG00000104804
ENSG00000104805	ENSG00000144136	ENSG00000106799	ENSG00000107796		ENSG00000104805
ENSG00000104812	ENSG00000144224	ENSG00000106803	ENSG00000107798		ENSG00000104812
ENSG00000104814	ENSG00000144231	ENSG00000106829	ENSG00000107815		ENSG00000104814
ENSG00000104823	ENSG00000144320	ENSG00000106852	ENSG00000107819		ENSG00000104823
ENSG00000104824	ENSG00000144381	ENSG00000106927	ENSG00000107862		ENSG00000104824
ENSG00000104833	ENSG00000144535	ENSG00000106976	ENSG00000107863		ENSG00000104833
ENSG00000104835	ENSG00000144559	ENSG00000106992	ENSG00000107864		ENSG00000104835
ENSG00000104852	ENSG00000144566	ENSG00000107020	ENSG00000107897		ENSG00000104852
ENSG00000104853	ENSG00000144591	ENSG00000107021	ENSG00000107902		ENSG00000104853
ENSG00000104859	ENSG00000144677	ENSG00000107036	ENSG00000107937		ENSG00000104859
ENSG00000104863	ENSG00000144711	ENSG00000107077	ENSG00000107949		ENSG00000104863
ENSG00000104866	ENSG00000144713	ENSG00000107099	ENSG00000107954		ENSG00000104866
ENSG00000104872	ENSG00000144736	ENSG00000107104	ENSG00000108001		ENSG00000104872
ENSG00000104879	ENSG00000144744	ENSG00000107105	ENSG00000108010		ENSG00000104879
ENSG00000104884	ENSG00000144746	ENSG00000107130	ENSG00000108039		ENSG00000104884
ENSG00000104885	ENSG00000144834	ENSG00000107147	ENSG00000108055		ENSG00000104885
ENSG00000104888	ENSG00000144840	ENSG00000107165	ENSG00000108061		ENSG00000104888
ENSG00000104889	ENSG00000144848	ENSG00000107185	ENSG00000108064		ENSG00000104889
ENSG00000104892	ENSG00000144867	ENSG00000107186	ENSG00000108091		ENSG00000104892
ENSG00000104897	ENSG00000144895	ENSG00000107187	ENSG00000108094		ENSG00000104897
ENSG00000104903	ENSG00000144959	ENSG00000107201	ENSG00000108100		ENSG00000104903
ENSG00000104907	ENSG00000145147	ENSG00000107223	ENSG00000108107		ENSG00000104907
ENSG00000104915	ENSG00000145194	ENSG00000107242	ENSG00000108176		ENSG00000104915
ENSG00000104936	ENSG00000145217	ENSG00000107262	ENSG00000108179		ENSG00000104936
ENSG00000104946	ENSG00000145220	ENSG00000107281	ENSG00000108187		ENSG00000104946
ENSG00000104953	ENSG00000145246	ENSG00000107295	ENSG00000108239		ENSG00000104953
ENSG00000104957	ENSG00000145293	ENSG00000107331	ENSG00000108242		ENSG00000104957
ENSG00000104964	ENSG00000145331	ENSG00000107341	ENSG00000108262		ENSG00000104964
ENSG00000104967	ENSG00000145332	ENSG00000107362	ENSG00000108270		ENSG00000104967
ENSG00000104980	ENSG00000145348	ENSG00000107371	ENSG00000108292		ENSG00000104980
ENSG00000105011	ENSG00000145349	ENSG00000107372	ENSG00000108294		ENSG00000105011
ENSG00000105048	ENSG00000145362	ENSG00000107404	ENSG00000108296		ENSG00000105048
ENSG00000105053	ENSG00000145425	ENSG00000107485	ENSG00000108298		ENSG00000105053
ENSG00000105058	ENSG00000145451	ENSG00000107518	ENSG00000108306		ENSG00000105058
ENSG00000105063	ENSG00000145476	ENSG00000107537	ENSG00000108344		ENSG00000105063
ENSG00000105122	ENSG00000145592	ENSG00000107554	ENSG00000108349		ENSG00000105122
ENSG00000105131	ENSG00000145604	ENSG00000107566	ENSG00000108370		ENSG00000105131
ENSG00000105135	ENSG00000145675	ENSG00000107581	ENSG00000108375		ENSG00000105135
ENSG00000105137	ENSG00000145740	ENSG00000107593	ENSG00000108389		ENSG00000105137
ENSG00000105141	ENSG00000145780	ENSG00000107611	ENSG00000108395		ENSG00000105141
ENSG00000105143	ENSG00000145817	ENSG00000107623	ENSG00000108424		ENSG00000105143
ENSG00000105146	ENSG00000145819	ENSG00000107643	ENSG00000108433		ENSG00000105146
ENSG00000105171	ENSG00000145860	ENSG00000107669	ENSG00000108439		ENSG00000105171
ENSG00000105173	ENSG00000145888	ENSG00000107731	ENSG00000108443		ENSG00000105173
ENSG00000105185	ENSG00000145912	ENSG00000107742	ENSG00000108465		ENSG00000105185
ENSG00000105186	ENSG00000145934	ENSG00000107745	ENSG00000108468		ENSG00000105186
ENSG00000105193	ENSG00000145949	ENSG00000107758	ENSG00000108469		ENSG00000105193
ENSG00000105197	ENSG00000145996	ENSG00000107779	ENSG00000108504		ENSG00000105197
ENSG00000105202	ENSG00000146007	ENSG00000107798	ENSG00000108509		ENSG00000105202
ENSG00000105204	ENSG00000146021	ENSG00000107815	ENSG00000108510		ENSG00000105204
ENSG00000105216	ENSG00000146085	ENSG00000107819	ENSG00000108515		ENSG00000105216
ENSG00000105220	ENSG00000146143	ENSG00000107859	ENSG00000108523		ENSG00000105220
ENSG00000105221	ENSG00000146409	ENSG00000107862	ENSG00000108528		ENSG00000105221
ENSG00000105223	ENSG00000146453	ENSG00000107864	ENSG00000108561		ENSG00000105223
ENSG00000105229	ENSG00000146476	ENSG00000107890	ENSG00000108576		ENSG00000105229
ENSG00000105245	ENSG00000146535	ENSG00000107902	ENSG00000108582		ENSG00000105245
ENSG00000105248	ENSG00000146676	ENSG00000107937	ENSG00000108587		ENSG00000105248
ENSG00000105254	ENSG00000146731	ENSG00000107949	ENSG00000108588		ENSG00000105254
ENSG00000105255	ENSG00000146733	ENSG00000107954	ENSG00000108590		ENSG00000105255
ENSG00000105258	ENSG00000146828	ENSG00000108001	ENSG00000108591		ENSG00000105258
ENSG00000105261	ENSG00000146834	ENSG00000108010	ENSG00000108592		ENSG00000105261
ENSG00000105278	ENSG00000146872	ENSG00000108039	ENSG00000108599		ENSG00000105278
ENSG00000105281	ENSG00000146909	ENSG00000108055	ENSG00000108604		ENSG00000105281
ENSG00000105287	ENSG00000146963	ENSG00000108061	ENSG00000108639		ENSG00000105287
ENSG00000105289	ENSG00000147010	ENSG00000108064	ENSG00000108654		ENSG00000105289
ENSG00000105290	ENSG00000147044	ENSG00000108091	ENSG00000108669		ENSG00000105290
ENSG00000105298	ENSG00000147050	ENSG00000108094	ENSG00000108671		ENSG00000105298
ENSG00000105323	ENSG00000147065	ENSG00000108100	ENSG00000108733		ENSG00000105323
ENSG00000105325	ENSG00000147133	ENSG00000108107	ENSG00000108773		ENSG00000105325
ENSG00000105329	ENSG00000147162	ENSG00000108175	ENSG00000108774		ENSG00000105329
ENSG00000105341	ENSG00000147164	ENSG00000108176	ENSG00000108784		ENSG00000105341
ENSG00000105364	ENSG00000147202	ENSG00000108179	ENSG00000108788		ENSG00000105364
ENSG00000105372	ENSG00000147224	ENSG00000108187	ENSG00000108797		ENSG00000105372
ENSG00000105373	ENSG00000147251	ENSG00000108219	ENSG00000108799		ENSG00000105373
ENSG00000105379	ENSG00000147364	ENSG00000108239	ENSG00000108819		ENSG00000105379
ENSG00000105392	ENSG00000147416	ENSG00000108242	ENSG00000108821		ENSG00000105392
ENSG00000105401	ENSG00000147419	ENSG00000108262	ENSG00000108829		ENSG00000105401
ENSG00000105402	ENSG00000147434	ENSG00000108264	ENSG00000108840		ENSG00000105402
ENSG00000105426	ENSG00000147454	ENSG00000108270	ENSG00000108846		ENSG00000105426
ENSG00000105428	ENSG00000147457	ENSG00000108292	ENSG00000108848		ENSG00000105428
ENSG00000105429	ENSG00000147471	ENSG00000108294	ENSG00000108883		ENSG00000105429
ENSG00000105438	ENSG00000147481	ENSG00000108296	ENSG00000108924		ENSG00000105438
ENSG00000105443	ENSG00000147509	ENSG00000108298	ENSG00000108946		ENSG00000105443
ENSG00000105447	ENSG00000147536	ENSG00000108306	ENSG00000108953		ENSG00000105447
ENSG00000105464	ENSG00000147576	ENSG00000108344	ENSG00000108960		ENSG00000105464
ENSG00000105467	ENSG00000147588	ENSG00000108349	ENSG00000108963		ENSG00000105467
ENSG00000105486	ENSG00000147592	ENSG00000108379	ENSG00000108984		ENSG00000105486
ENSG00000105507	ENSG00000147604	ENSG00000108389	ENSG00000109016		ENSG00000105507
ENSG00000105516	ENSG00000147647	ENSG00000108424	ENSG00000109061		ENSG00000105516
ENSG00000105520	ENSG00000147677	ENSG00000108433	ENSG00000109062		ENSG00000105520
ENSG00000105552	ENSG00000147679	ENSG00000108439	ENSG00000109063		ENSG00000105552
ENSG00000105556	ENSG00000147684	ENSG00000108443	ENSG00000109065		ENSG00000105556
ENSG00000105568	ENSG00000147852	ENSG00000108465	ENSG00000109066		ENSG00000105568
ENSG00000105576	ENSG00000147853	ENSG00000108468	ENSG00000109083		ENSG00000105576
ENSG00000105583	ENSG00000148090	ENSG00000108469	ENSG00000109103		ENSG00000105583
ENSG00000105607	ENSG00000148154	ENSG00000108506	ENSG00000109107		ENSG00000105607
ENSG00000105610	ENSG00000148175	ENSG00000108509	ENSG00000109111		ENSG00000105610
ENSG00000105612	ENSG00000148225	ENSG00000108510	ENSG00000109133		ENSG00000105612
ENSG00000105613	ENSG00000148308	ENSG00000108511	ENSG00000109158		ENSG00000105613
ENSG00000105617	ENSG00000148334	ENSG00000108515	ENSG00000109163		ENSG00000105617
ENSG00000105618	ENSG00000148335	ENSG00000108523	ENSG00000109181		ENSG00000105618
ENSG00000105640	ENSG00000148339	ENSG00000108528	ENSG00000109189		ENSG00000105640
ENSG00000105641	ENSG00000148341	ENSG00000108551	ENSG00000109193		ENSG00000105641
ENSG00000105642	ENSG00000148450	ENSG00000108561	ENSG00000109220		ENSG00000105642
ENSG00000105643	ENSG00000148459	ENSG00000108576	ENSG00000109323		ENSG00000105643
ENSG00000105647	ENSG00000148606	ENSG00000108582	ENSG00000109332		ENSG00000105647
ENSG00000105649	ENSG00000148680	ENSG00000108587	ENSG00000109339		ENSG00000105649
ENSG00000105650	ENSG00000148719	ENSG00000108588	ENSG00000109381		ENSG00000105650
ENSG00000105655	ENSG00000148824	ENSG00000108590	ENSG00000109436		ENSG00000105655
ENSG00000105669	ENSG00000148835	ENSG00000108591	ENSG00000109452		ENSG00000105669
ENSG00000105671	ENSG00000148842	ENSG00000108599	ENSG00000109466		ENSG00000105671
ENSG00000105672	ENSG00000148848	ENSG00000108602	ENSG00000109472		ENSG00000105672
ENSG00000105677	ENSG00000148925	ENSG00000108604	ENSG00000109475		ENSG00000105677
ENSG00000105679	ENSG00000148942	ENSG00000108639	ENSG00000109519		ENSG00000105679
ENSG00000105694	ENSG00000148943	ENSG00000108641	ENSG00000109534		ENSG00000105694
ENSG00000105700	ENSG00000148950	ENSG00000108654	ENSG00000109536		ENSG00000105700
ENSG00000105717	ENSG00000149084	ENSG00000108669	ENSG00000109572		ENSG00000105717
ENSG00000105722	ENSG00000149089	ENSG00000108671	ENSG00000109586		ENSG00000105722
ENSG00000105723	ENSG00000149091	ENSG00000108679	ENSG00000109606		ENSG00000105723
ENSG00000105726	ENSG00000149100	ENSG00000108733	ENSG00000109618		ENSG00000105726
ENSG00000105737	ENSG00000149136	ENSG00000108773	ENSG00000109654		ENSG00000105737
ENSG00000105738	ENSG00000149187	ENSG00000108774	ENSG00000109670		ENSG00000105738
ENSG00000105755	ENSG00000149212	ENSG00000108784	ENSG00000109685		ENSG00000105755
ENSG00000105771	ENSG00000149262	ENSG00000108788	ENSG00000109686		ENSG00000105771
ENSG00000105778	ENSG00000149269	ENSG00000108797	ENSG00000109736		ENSG00000105778
ENSG00000105793	ENSG00000149273	ENSG00000108799	ENSG00000109756		ENSG00000105793
ENSG00000105808	ENSG00000149295	ENSG00000108819	ENSG00000109775		ENSG00000105808
ENSG00000105810	ENSG00000149311	ENSG00000108823	ENSG00000109814		ENSG00000105810
ENSG00000105819	ENSG00000149313	ENSG00000108840	ENSG00000109832		ENSG00000105819
ENSG00000105821	ENSG00000149476	ENSG00000108846	ENSG00000109846		ENSG00000105821
ENSG00000105825	ENSG00000149483	ENSG00000108848	ENSG00000109854		ENSG00000105825
ENSG00000105829	ENSG00000149503	ENSG00000108852	ENSG00000109861		ENSG00000105829
ENSG00000105851	ENSG00000149541	ENSG00000108883	ENSG00000109911		ENSG00000105851
ENSG00000105852	ENSG00000149554	ENSG00000108946	ENSG00000109917		ENSG00000105852
ENSG00000105854	ENSG00000149577	ENSG00000108947	ENSG00000109919		ENSG00000105854
ENSG00000105865	ENSG00000149806	ENSG00000108950	ENSG00000109927		ENSG00000105865
ENSG00000105875	ENSG00000149923	ENSG00000108963	ENSG00000109956		ENSG00000105875
ENSG00000105887	ENSG00000150054	ENSG00000108984	ENSG00000109971		ENSG00000105887
ENSG00000105926	ENSG00000150093	ENSG00000109016	ENSG00000110031		ENSG00000105926
ENSG00000105929	ENSG00000150401	ENSG00000109061	ENSG00000110046		ENSG00000105929
ENSG00000105948	ENSG00000150456	ENSG00000109062	ENSG00000110047		ENSG00000105948
ENSG00000105953	ENSG00000150594	ENSG00000109063	ENSG00000110048		ENSG00000105953
ENSG00000105963	ENSG00000150753	ENSG00000109065	ENSG00000110060		ENSG00000105963
ENSG00000105967	ENSG00000150756	ENSG00000109066	ENSG00000110063		ENSG00000105967
ENSG00000105968	ENSG00000150760	ENSG00000109079	ENSG00000110066		ENSG00000105968
ENSG00000105971	ENSG00000150787	ENSG00000109083	ENSG00000110074		ENSG00000105971
ENSG00000105974	ENSG00000150990	ENSG00000109103	ENSG00000110076		ENSG00000105974
ENSG00000105976	ENSG00000150991	ENSG00000109107	ENSG00000110090		ENSG00000105976
ENSG00000105983	ENSG00000151092	ENSG00000109111	ENSG00000110104		ENSG00000105983
ENSG00000105989	ENSG00000151148	ENSG00000109132	ENSG00000110107		ENSG00000105989
ENSG00000105991	ENSG00000151151	ENSG00000109133	ENSG00000110171		ENSG00000105991
ENSG00000105993	ENSG00000151176	ENSG00000109163	ENSG00000110172		ENSG00000105993
ENSG00000105996	ENSG00000151208	ENSG00000109181	ENSG00000110237		ENSG00000105996
ENSG00000105997	ENSG00000151229	ENSG00000109189	ENSG00000110315		ENSG00000105997
ENSG00000106004	ENSG00000151240	ENSG00000109193	ENSG00000110367		ENSG00000106004
ENSG00000106028	ENSG00000151247	ENSG00000109220	ENSG00000110395		ENSG00000106028
ENSG00000106031	ENSG00000151276	ENSG00000109323	ENSG00000110422		ENSG00000106031
ENSG00000106049	ENSG00000151414	ENSG00000109339	ENSG00000110436		ENSG00000106049
ENSG00000106069	ENSG00000151422	ENSG00000109452	ENSG00000110455		ENSG00000106069
ENSG00000106070	ENSG00000151445	ENSG00000109458	ENSG00000110514		ENSG00000106070
ENSG00000106077	ENSG00000151470	ENSG00000109466	ENSG00000110536		ENSG00000106077
ENSG00000106086	ENSG00000151498	ENSG00000109472	ENSG00000110583		ENSG00000106086
ENSG00000106089	ENSG00000151502	ENSG00000109475	ENSG00000110619		ENSG00000106089
ENSG00000106105	ENSG00000151552	ENSG00000109519	ENSG00000110628		ENSG00000106105
ENSG00000106113	ENSG00000151576	ENSG00000109534	ENSG00000110660		ENSG00000106113
ENSG00000106123	ENSG00000151577	ENSG00000109536	ENSG00000110697		ENSG00000106123
ENSG00000106133	ENSG00000151611	ENSG00000109572	ENSG00000110700		ENSG00000106133
ENSG00000106144	ENSG00000151657	ENSG00000109586	ENSG00000110711		ENSG00000106144
ENSG00000106153	ENSG00000151690	ENSG00000109606	ENSG00000110713		ENSG00000106153
ENSG00000106211	ENSG00000151694	ENSG00000109618	ENSG00000110717		ENSG00000106211
ENSG00000106245	ENSG00000151746	ENSG00000109625	ENSG00000110719		ENSG00000106245
ENSG00000106258	ENSG00000151806	ENSG00000109654	ENSG00000110721		ENSG00000106258
ENSG00000106263	ENSG00000152127	ENSG00000109670	ENSG00000110768		ENSG00000106263
ENSG00000106278	ENSG00000152133	ENSG00000109686	ENSG00000110799		ENSG00000106278
ENSG00000106290	ENSG00000152234	ENSG00000109689	ENSG00000110801		ENSG00000106290
ENSG00000106299	ENSG00000152315	ENSG00000109736	ENSG00000110841		ENSG00000106299
ENSG00000106302	ENSG00000152380	ENSG00000109756	ENSG00000110844		ENSG00000106302
ENSG00000106304	ENSG00000152404	ENSG00000109814	ENSG00000110871		ENSG00000106304
ENSG00000106330	ENSG00000152465	ENSG00000109846	ENSG00000110880		ENSG00000106330
ENSG00000106331	ENSG00000152527	ENSG00000109854	ENSG00000110881		ENSG00000106331
ENSG00000106333	ENSG00000152583	ENSG00000109911	ENSG00000110906		ENSG00000106333
ENSG00000106344	ENSG00000152620	ENSG00000109917	ENSG00000110911		ENSG00000106344
ENSG00000106346	ENSG00000152670	ENSG00000109919	ENSG00000110917		ENSG00000106346
ENSG00000106348	ENSG00000152683	ENSG00000109956	ENSG00000110921		ENSG00000106348
ENSG00000106355	ENSG00000152684	ENSG00000109971	ENSG00000110931		ENSG00000106355
ENSG00000106366	ENSG00000152689	ENSG00000110046	ENSG00000110955		ENSG00000106366
ENSG00000106367	ENSG00000152700	ENSG00000110047	ENSG00000110958		ENSG00000106367
ENSG00000106384	ENSG00000152822	ENSG00000110048	ENSG00000110987		ENSG00000106384
ENSG00000106392	ENSG00000152932	ENSG00000110060	ENSG00000111046		ENSG00000106392
ENSG00000106397	ENSG00000152953	ENSG00000110063	ENSG00000111058		ENSG00000106397
ENSG00000106400	ENSG00000153015	ENSG00000110066	ENSG00000111077		ENSG00000106400
ENSG00000106410	ENSG00000153037	ENSG00000110074	ENSG00000111110		ENSG00000106410
ENSG00000106443	ENSG00000153086	ENSG00000110075	ENSG00000111142		ENSG00000106443
ENSG00000106462	ENSG00000153187	ENSG00000110076	ENSG00000111144		ENSG00000106462
ENSG00000106511	ENSG00000153214	ENSG00000110090	ENSG00000111181		ENSG00000106511
ENSG00000106524	ENSG00000153266	ENSG00000110092	ENSG00000111186		ENSG00000106524
ENSG00000106526	ENSG00000153291	ENSG00000110107	ENSG00000111196		ENSG00000106526
ENSG00000106541	ENSG00000153558	ENSG00000110148	ENSG00000111218		ENSG00000106541
ENSG00000106546	ENSG00000153561	ENSG00000110171	ENSG00000111229		ENSG00000106546
ENSG00000106571	ENSG00000153707	ENSG00000110172	ENSG00000111231		ENSG00000106571
ENSG00000106588	ENSG00000153767	ENSG00000110315	ENSG00000111237		ENSG00000106588
ENSG00000106591	ENSG00000153914	ENSG00000110347	ENSG00000111249		ENSG00000106591
ENSG00000106610	ENSG00000153933	ENSG00000110367	ENSG00000111262		ENSG00000106610
ENSG00000106615	ENSG00000153936	ENSG00000110395	ENSG00000111271		ENSG00000106615
ENSG00000106617	ENSG00000153944	ENSG00000110422	ENSG00000111275		ENSG00000106617
ENSG00000106624	ENSG00000154001	ENSG00000110436	ENSG00000111300		ENSG00000106624
ENSG00000106628	ENSG00000154027	ENSG00000110536	ENSG00000111328		ENSG00000106628
ENSG00000106635	ENSG00000154059	ENSG00000110583	ENSG00000111348		ENSG00000106635
ENSG00000106636	ENSG00000154114	ENSG00000110619	ENSG00000111358		ENSG00000106636
ENSG00000106638	ENSG00000154222	ENSG00000110628	ENSG00000111361		ENSG00000106638
ENSG00000106648	ENSG00000154229	ENSG00000110660	ENSG00000111364		ENSG00000106648
ENSG00000106688	ENSG00000154309	ENSG00000110675	ENSG00000111405		ENSG00000106688
ENSG00000106689	ENSG00000154380	ENSG00000110697	ENSG00000111445		ENSG00000106689
ENSG00000106692	ENSG00000154611	ENSG00000110700	ENSG00000111450		ENSG00000106692
ENSG00000106701	ENSG00000154678	ENSG00000110711	ENSG00000111481		ENSG00000106701
ENSG00000106771	ENSG00000154710	ENSG00000110713	ENSG00000111530		ENSG00000106771
ENSG00000106780	ENSG00000154803	ENSG00000110717	ENSG00000111540		ENSG00000106780
ENSG00000106789	ENSG00000154822	ENSG00000110721	ENSG00000111596		ENSG00000106789
ENSG00000106803	ENSG00000154889	ENSG00000110768	ENSG00000111602		ENSG00000106803
ENSG00000106829	ENSG00000154917	ENSG00000110801	ENSG00000111605		ENSG00000106829
ENSG00000106852	ENSG00000154975	ENSG00000110841	ENSG00000111615		ENSG00000106852
ENSG00000106927	ENSG00000155100	ENSG00000110844	ENSG00000111639		ENSG00000106927
ENSG00000106976	ENSG00000155158	ENSG00000110848	ENSG00000111640		ENSG00000106976
ENSG00000106992	ENSG00000155189	ENSG00000110871	ENSG00000111641		ENSG00000106992
ENSG00000106993	ENSG00000155252	ENSG00000110880	ENSG00000111642		ENSG00000106993
ENSG00000107021	ENSG00000155265	ENSG00000110887	ENSG00000111647		ENSG00000107021
ENSG00000107036	ENSG00000155304	ENSG00000110906	ENSG00000111667		ENSG00000107036
ENSG00000107077	ENSG00000155366	ENSG00000110911	ENSG00000111669		ENSG00000107077
ENSG00000107099	ENSG00000155368	ENSG00000110917	ENSG00000111674		ENSG00000107099
ENSG00000107104	ENSG00000155463	ENSG00000110921	ENSG00000111676		ENSG00000107104
ENSG00000107105	ENSG00000155465	ENSG00000110925	ENSG00000111679		ENSG00000107105
ENSG00000107130	ENSG00000155561	ENSG00000110931	ENSG00000111684		ENSG00000107130
ENSG00000107164	ENSG00000155657	ENSG00000110934	ENSG00000111711		ENSG00000107164
ENSG00000107175	ENSG00000155827	ENSG00000110955	ENSG00000111713		ENSG00000107175
ENSG00000107185	ENSG00000155893	ENSG00000110958	ENSG00000111716		ENSG00000107185
ENSG00000107186	ENSG00000155906	ENSG00000110987	ENSG00000111725		ENSG00000107186
ENSG00000107187	ENSG00000155957	ENSG00000111011	ENSG00000111727		ENSG00000107187
ENSG00000107201	ENSG00000155970	ENSG00000111012	ENSG00000111731		ENSG00000107201
ENSG00000107223	ENSG00000156017	ENSG00000111046	ENSG00000111775		ENSG00000107223
ENSG00000107242	ENSG00000156052	ENSG00000111049	ENSG00000111785		ENSG00000107242
ENSG00000107249	ENSG00000156110	ENSG00000111052	ENSG00000111786		ENSG00000107249
ENSG00000107262	ENSG00000156113	ENSG00000111077	ENSG00000111788		ENSG00000107262
ENSG00000107263	ENSG00000156170	ENSG00000111110	ENSG00000111802		ENSG00000107263
ENSG00000107281	ENSG00000156171	ENSG00000111142	ENSG00000111816		ENSG00000107281
ENSG00000107282	ENSG00000156239	ENSG00000111144	ENSG00000111832		ENSG00000107282
ENSG00000107331	ENSG00000156261	ENSG00000111145	ENSG00000111837		ENSG00000107331
ENSG00000107341	ENSG00000156304	ENSG00000111186	ENSG00000111875		ENSG00000107341
ENSG00000107362	ENSG00000156398	ENSG00000111196	ENSG00000111879		ENSG00000107362
ENSG00000107371	ENSG00000156413	ENSG00000111218	ENSG00000111880		ENSG00000107371
ENSG00000107372	ENSG00000156469	ENSG00000111229	ENSG00000111885		ENSG00000107372
ENSG00000107404	ENSG00000156471	ENSG00000111231	ENSG00000111897		ENSG00000107404
ENSG00000107485	ENSG00000156482	ENSG00000111237	ENSG00000111906		ENSG00000107485
ENSG00000107518	ENSG00000156502	ENSG00000111249	ENSG00000111911		ENSG00000107518
ENSG00000107537	ENSG00000156697	ENSG00000111262	ENSG00000111912		ENSG00000107537
ENSG00000107554	ENSG00000156709	ENSG00000111266	ENSG00000112031		ENSG00000107554
ENSG00000107566	ENSG00000156795	ENSG00000111271	ENSG00000112062		ENSG00000107566
ENSG00000107581	ENSG00000156802	ENSG00000111275	ENSG00000112077		ENSG00000107581
ENSG00000107593	ENSG00000156869	ENSG00000111276	ENSG00000112079		ENSG00000107593
ENSG00000107623	ENSG00000156873	ENSG00000111300	ENSG00000112081		ENSG00000107623
ENSG00000107643	ENSG00000156875	ENSG00000111319	ENSG00000112096		ENSG00000107643
ENSG00000107669	ENSG00000156931	ENSG00000111328	ENSG00000112110		ENSG00000107669
ENSG00000107672	ENSG00000156958	ENSG00000111344	ENSG00000112118		ENSG00000107672
ENSG00000107731	ENSG00000156959	ENSG00000111348	ENSG00000112144		ENSG00000107731
ENSG00000107742	ENSG00000156973	ENSG00000111358	ENSG00000112159		ENSG00000107742
ENSG00000107745	ENSG00000157020	ENSG00000111361	ENSG00000112167		ENSG00000107745
ENSG00000107758	ENSG00000157103	ENSG00000111364	ENSG00000112175		ENSG00000107758
ENSG00000107796	ENSG00000157107	ENSG00000111405	ENSG00000112183		ENSG00000107796
ENSG00000107807	ENSG00000157152	ENSG00000111424	ENSG00000112186		ENSG00000107807
ENSG00000107815	ENSG00000157184	ENSG00000111432	ENSG00000112208		ENSG00000107815
ENSG00000107819	ENSG00000157191	ENSG00000111445	ENSG00000112237		ENSG00000107819
ENSG00000107859	ENSG00000157219	ENSG00000111481	ENSG00000112242		ENSG00000107859
ENSG00000107862	ENSG00000157240	ENSG00000111530	ENSG00000112245		ENSG00000107862
ENSG00000107863	ENSG00000157326	ENSG00000111540	ENSG00000112249		ENSG00000107863
ENSG00000107864	ENSG00000157379	ENSG00000111596	ENSG00000112282		ENSG00000107864
ENSG00000107897	ENSG00000157388	ENSG00000111602	ENSG00000112294		ENSG00000107897
ENSG00000107902	ENSG00000157445	ENSG00000111605	ENSG00000112304		ENSG00000107902
ENSG00000107929	ENSG00000157483	ENSG00000111615	ENSG00000112305		ENSG00000107929
ENSG00000107937	ENSG00000157593	ENSG00000111639	ENSG00000112306		ENSG00000107937
ENSG00000107949	ENSG00000157600	ENSG00000111640	ENSG00000112319		ENSG00000107949
ENSG00000107951	ENSG00000157637	ENSG00000111641	ENSG00000112333		ENSG00000107951
ENSG00000107954	ENSG00000157764	ENSG00000111642	ENSG00000112335		ENSG00000107954
ENSG00000108001	ENSG00000157765	ENSG00000111647	ENSG00000112339		ENSG00000108001
ENSG00000108010	ENSG00000157796	ENSG00000111666	ENSG00000112367		ENSG00000108010
ENSG00000108039	ENSG00000157800	ENSG00000111667	ENSG00000112379		ENSG00000108039
ENSG00000108055	ENSG00000157823	ENSG00000111669	ENSG00000112406		ENSG00000108055
ENSG00000108061	ENSG00000157827	ENSG00000111671	ENSG00000112419		ENSG00000108061
ENSG00000108064	ENSG00000157869	ENSG00000111674	ENSG00000112473		ENSG00000108064
[truncated: 9,417 more rows]

## Sheet: B) Deprecated ENSG History
Old stable ID	New stable ID	Release	Mapping score
ENSG00000006114.1	ENSG00000006114.1	3	0
ENSG00000006114.1	ENSG00000006114.2	15	0
ENSG00000006114.1	<retired>	76	0
ENSG00000006114.2	ENSG00000006114.3	21	0
ENSG00000006114.4	ENSG00000006114.5	38	0
ENSG00000006114.5	ENSG00000006114.6	47	0.812364
ENSG00000006114.6	ENSG00000006114.7	55	0.991052
ENSG00000006114.7	ENSG00000006114.8	56	0.97735
ENSG00000006114.8	ENSG00000006114.9	58	0.927314
ENSG00000006114.9	ENSG00000006114.10	62	0.980441
ENSG00000006114.10	ENSG00000006114.11	69	0.966595
ENSG00000006114.11	<retired>	76	0
Old stable ID	New stable ID	Release	Mapping score
ENSG00000007816.1	ENSG00000007816.1	3	0
ENSG00000007816.1	ENSG00000007816.2	26	0
ENSG00000007816.2	ENSG00000007816.3	38	0
ENSG00000007816.3	ENSG00000007816.4	47	0.955077
ENSG00000007816.4	<retired>	55	0
ENSG00000007816.4	ENSG00000227057.1	55	0.908942
ENSG00000007816.4	ENSG00000226916.1	55	0.933079
ENSG00000007816.4	ENSG00000236222.1	55	0.933079
Old stable ID	New stable ID	Release	Mapping score
ENSG00000017373.1	ENSG00000017373.1	3	0
ENSG00000017373.1	ENSG00000017373.2	15	0
ENSG00000017373.1	<retired>	76	0
ENSG00000017373.2	ENSG00000017373.3	18.1	0
ENSG00000017373.3	ENSG00000017373.4	21	0
ENSG00000017373.4	ENSG00000017373.5	26	0
ENSG00000017373.5	ENSG00000017373.6	27	0
ENSG00000017373.6	ENSG00000017373.7	38	0
ENSG00000017373.7	ENSG00000017373.8	47	0.637528
ENSG00000017373.8	ENSG00000017373.9	55	0.919075
ENSG00000017373.9	ENSG00000017373.10	62	0.851431
ENSG00000017373.10	ENSG00000017373.11	68	0.885498
ENSG00000017373.11	<retired>	76	0
Old stable ID	New stable ID	Release	Mapping score
ENSG00000017621.1	ENSG00000017621.1	3	0
ENSG00000017621.1	ENSG00000017621.2	15	0
ENSG00000017621.1	<retired>	76	0
ENSG00000017621.2	ENSG00000017621.3	26	0
ENSG00000017621.3	ENSG00000017621.4	38	0
ENSG00000017621.4	ENSG00000017621.5	47	0.699217
ENSG00000017621.5	ENSG00000017621.6	50	0.962064
ENSG00000017621.6	ENSG00000017621.7	55	0.851692
ENSG00000017621.7	ENSG00000017621.8	56	0.990957
ENSG00000017621.8	ENSG00000017621.9	58	0.986171
ENSG00000017621.9	ENSG00000017621.10	60	0.965929
ENSG00000017621.10	ENSG00000017621.11	62	0.985857
ENSG00000017621.11	<retired>	76	0
Old stable ID	New stable ID	Release	Mapping score
ENSG00000023843.1	ENSG00000023843.1	3	0
ENSG00000023843.1	<retired>	64	0
Old stable ID	New stable ID	Release	Mapping score
ENSG00000031544.1	ENSG00000031544.1	3	0
ENSG00000031544.1	ENSG00000031544.2	15	0
ENSG00000031544.1	<retired>	76	0
ENSG00000031544.2	ENSG00000031544.3	18.1	0
ENSG00000031544.3	ENSG00000031544.4	18.2	0
ENSG00000031544.4	ENSG00000031544.5	38	0
ENSG00000031544.5	ENSG00000031544.6	47	0.578163
ENSG00000031544.6	ENSG00000031544.7	55	0.997781
ENSG00000031544.7	ENSG00000031544.8	62	0.914598
ENSG00000031544.8	ENSG00000031544.9	66	0.914299
ENSG00000031544.9	ENSG00000031544.10	74	0.988277
ENSG00000031544.10	<retired>	76	0
Old stable ID	New stable ID	Release	Mapping score
ENSG00000042022.1	ENSG00000042022.1	3	0
ENSG00000042022.1	ENSG00000042022.2	26	0
ENSG00000042022.2	ENSG00000042022.3	38	0
ENSG00000042022.3	ENSG00000042022.4	47	0.948308
ENSG00000042022.4	ENSG00000042022.5	50	0.998596
ENSG00000042022.5	ENSG00000042022.6	55	0.0293251
ENSG00000042022.6	<retired>	56	0
Old stable ID	New stable ID	Release	Mapping score
ENSG00000049319.1	ENSG00000049319.1	3	0
ENSG00000049319.1	ENSG00000049319.2	50	0.840133
ENSG00000049319.2	<retired>	76	0
Old stable ID	New stable ID	Release	Mapping score
ENSG00000051415.1	ENSG00000051415.1	3	0
ENSG00000051415.1	ENSG00000051415.2	15	0
ENSG00000051415.2	ENSG00000051415.3	18.1	0
ENSG00000051415.3	ENSG00000051415.4	18.2	0
ENSG00000051415.4	ENSG00000051415.5	21	0
ENSG00000051415.5	ENSG00000051415.6	26	0
ENSG00000051415.6	ENSG00000051415.7	38	0
ENSG00000051415.7	ENSG00000051415.8	47	0.899784
ENSG00000051415.8	ENSG00000237763.1	55	0.898067
ENSG00000051415.8	<retired>	55	0
Old stable ID	New stable ID	Release	Mapping score
ENSG00000056661.1	ENSG00000056661.1	3	0
ENSG00000056661.1	ENSG00000056661.2	15	0
ENSG00000056661.2	ENSG00000056661.3	18.2	0
ENSG00000056661.3	ENSG00000056661.4	21	0
ENSG00000056661.4	ENSG00000056661.5	26	0
ENSG00000056661.5	ENSG00000056661.6	38	0
ENSG00000056661.6	ENSG00000056661.7	40	0.645183
ENSG00000056661.7	ENSG00000056661.8	47	0.494578
ENSG00000056661.8	ENSG00000056661.9	68	0.862101
ENSG00000056661.9	<retired>	76	0
Old stable ID	New stable ID	Release	Mapping score
ENSG00000068793.1	ENSG00000068793.1	3	0
ENSG00000068793.1	ENSG00000068793.2	15	0
ENSG00000068793.1	<retired>	76	0
ENSG00000068793.2	ENSG00000068793.3	18.1	0
ENSG00000068793.3	ENSG00000068793.4	18.2	0
ENSG00000068793.4	ENSG00000068793.5	26	0
ENSG00000068793.5	ENSG00000068793.6	27	0
ENSG00000068793.6	ENSG00000068793.7	38	0
ENSG00000068793.7	ENSG00000068793.8	55	0.92226
ENSG00000068793.8	ENSG00000068793.9	56	0.957307
ENSG00000068793.9	ENSG00000068793.10	62	0.995345
ENSG00000068793.10	ENSG00000068793.11	65	0.812008
ENSG00000068793.11	ENSG00000068793.12	68	0.994258
ENSG00000068793.12	ENSG00000068793.13	73	0.997795
ENSG00000068793.13	<retired>	76	0
Old stable ID	New stable ID	Release	Mapping score
ENSG00000079782.1	ENSG00000079782.1	3	0
ENSG00000079782.1	ENSG00000079782.2	18.1	0
ENSG00000079782.2	ENSG00000079782.3	18.2	0
ENSG00000079782.3	ENSG00000079782.4	21	0
ENSG00000079782.4	ENSG00000079782.5	26	0
ENSG00000079782.5	ENSG00000079782.6	27	0
ENSG00000079782.6	ENSG00000079782.7	38	0
ENSG00000079782.7	ENSG00000079782.8	47	0.79111
ENSG00000079782.8	<retired>	55	0
Old stable ID	New stable ID	Release	Mapping score
ENSG00000083842.1	ENSG00000083842.1	3	0
ENSG00000083842.1	ENSG00000083842.2	18.1	0
ENSG00000083842.2	ENSG00000083842.3	18.2	0
ENSG00000083842.3	ENSG00000083842.4	21	0
ENSG00000083842.4	ENSG00000083842.5	55	0.795381
ENSG00000083842.5	ENSG00000083842.6	62	0.959836
ENSG00000083842.6	ENSG00000083842.7	68	0.766625
ENSG00000083842.7	ENSG00000083842.8	69	0.999774
ENSG00000083842.8	<retired>	76	0
Old stable ID	New stable ID	Release	Mapping score
ENSG00000087916.1	ENSG00000087916.1	3	0
ENSG00000087916.1	ENSG00000087916.2	18.1	0
ENSG00000087916.2	ENSG00000087916.3	38	0
ENSG00000087916.3	ENSG00000087916.4	47	0.999779
ENSG00000087916.4	ENSG00000087916.5	55	0.926527
ENSG00000087916.5	ENSG00000087916.6	56	0.971546
ENSG00000087916.6	ENSG00000087916.7	62	0.934457
ENSG00000087916.7	<retired>	76	0
Old stable ID	New stable ID	Release	Mapping score
ENSG00000090920.1	ENSG00000090920.1	3	0
ENSG00000090920.1	ENSG00000090920.2	15	0
ENSG00000090920.2	ENSG00000090920.3	18.1	0
ENSG00000090920.3	ENSG00000090920.4	18.2	0
ENSG00000090920.4	ENSG00000090920.5	21	0
ENSG00000090920.5	ENSG00000090920.6	50	0.999791
ENSG00000090920.6	ENSG00000090920.7	55	0.930723
ENSG00000090920.7	ENSG00000090920.8	62	0.930723
ENSG00000090920.8	ENSG00000090920.9	70	0.971229
ENSG00000090920.9	<retired>	76	0
Old stable ID	New stable ID	Release	Mapping score
ENSG00000096238.1	ENSG00000096238.1	3	0
ENSG00000096238.1	ENSG00000096238.2	26	0
ENSG00000096238.2	ENSG00000096238.3	38	0
ENSG00000096238.3	ENSG00000096238.4	47	0.510262
ENSG00000096238.4	<retired>	55	0
ENSG00000096238.4	ENSG00000230685.1	55	0.999513
ENSG00000096238.4	ENSG00000226248.1	55	0.999513
ENSG00000096238.4	ENSG00000226651.1	55	0.999513
ENSG00000096238.4	ENSG00000223639.1	55	0.999513
ENSG00000096238.4	ENSG00000226417.1	55	0.999513
Old stable ID	New stable ID	Release	Mapping score
ENSG00000096467.1	ENSG00000096467.1	3	0
ENSG00000096467.1	ENSG00000096467.2	15	0
ENSG00000096467.2	ENSG00000096467.3	26	0
ENSG00000096467.3	ENSG00000096467.4	38	0
ENSG00000096467.4	ENSG00000096467.5	47	0.978707
ENSG00000096467.5	ENSG00000235676.1	55	0.908424
ENSG00000096467.5	ENSG00000224552.1	55	0.886289
ENSG00000096467.5	ENSG00000231488.1	55	0.908424
ENSG00000096467.5	<retired>	55	0
ENSG00000096467.5	ENSG00000236063.1	55	0.886289
ENSG00000096467.5	ENSG00000230475.1	55	0.886289
Old stable ID	New stable ID	Release	Mapping score
ENSG00000096474.1	ENSG00000096474.1	3	0
ENSG00000096474.1	ENSG00000096474.2	15	0
ENSG00000096474.2	ENSG00000096474.3	18.2	0
ENSG00000096474.3	ENSG00000096474.4	21	0
ENSG00000096474.5	ENSG00000096474.6	26	0
ENSG00000096474.6	ENSG00000096474.7	38	0
ENSG00000096474.7	ENSG00000096474.8	47	0.649222
ENSG00000096474.8	ENSG00000237333.1	55	0.810948
ENSG00000096474.8	ENSG00000230293.1	55	0.943754
ENSG00000096474.8	ENSG00000235222.1	55	0.940462
ENSG00000096474.8	ENSG00000227314.1	55	0.936852
ENSG00000096474.8	ENSG00000233345.1	55	0.806847
ENSG00000096474.8	<retired>	55	0
Old stable ID	New stable ID	Release	Mapping score
ENSG00000099882.1	ENSG00000099882.1	3	0
ENSG00000099882.1	ENSG00000099882.2	15	0
ENSG00000099882.2	ENSG00000099882.3	40	0.517511
ENSG00000099882.3	ENSG00000099882.4	47	0.517511
ENSG00000099882.4	ENSG00000099882.5	50	0.754601
ENSG00000099882.5	ENSG00000099882.6	55	0.98779
ENSG00000099882.6	ENSG00000099882.7	62	0.98625
ENSG00000099882.7	<retired>	68	0
Old stable ID	New stable ID	Release	Mapping score
ENSG00000100829.1	ENSG00000100829.1	3	0
ENSG00000100829.1	ENSG00000100829.2	18.2	0
ENSG00000100829.2	ENSG00000100829.3	21	0
ENSG00000100829.3	ENSG00000100829.4	26	0
ENSG00000100829.4	ENSG00000100829.5	27	0
ENSG00000100829.5	ENSG00000100829.6	38	0
ENSG00000100829.6	ENSG00000100829.7	47	0.438376
ENSG00000100829.7	ENSG00000100829.8	55	0.314902
ENSG00000100829.8	<retired>	62	0
Old stable ID	New stable ID	Release	Mapping score
ENSG00000100931.1	ENSG00000100931.1	3	0
ENSG00000100931.1	ENSG00000100931.2	18.1	0
ENSG00000100931.2	ENSG00000100931.3	18.2	0
ENSG00000100931.3	ENSG00000100931.4	21	0
ENSG00000100931.5	ENSG00000100931.6	26	0
ENSG00000100931.6	ENSG00000100931.7	38	0
ENSG00000100931.7	ENSG00000100931.8	47	0.72843
ENSG00000100931.8	ENSG00000100931.9	52	0.919386
ENSG00000100931.9	ENSG00000100931.10	56	0.877449
ENSG00000100931.10	ENSG00000100931.11	61	0.879471
Old stable ID	New stable ID	Release	Mapping score
ENSG00000101321.1	ENSG00000101321.1	3	0
ENSG00000101321.1	ENSG00000101321.2	38	0
ENSG00000101321.2	ENSG00000101321.3	56	0.999828
ENSG00000101321.3	<retired>	74	0
Old stable ID	New stable ID	Release	Mapping score
ENSG00000102069.1	ENSG00000102069.1	3	0
ENSG00000102069.1	ENSG00000102069.2	38	0
ENSG00000102069.2	ENSG00000102069.3	47	0.665354
ENSG00000102069.3	<retired>	76	0
Old stable ID	New stable ID	Release	Mapping score
ENSG00000102080.1	ENSG00000102080.1	3	0
ENSG00000102080.1	ENSG00000102080.2	15	0
ENSG00000102080.2	ENSG00000102080.3	26	0
ENSG00000102080.3	ENSG00000102080.4	38	0
ENSG00000102080.4	ENSG00000102080.5	47	0.686116
ENSG00000102080.5	ENSG00000102080.6	55	0.912363
ENSG00000102080.6	ENSG00000102080.7	56	0.982947
ENSG00000102080.7	ENSG00000102080.8	62	0.944935
ENSG00000102080.8	<retired>	76	0
Old stable ID	New stable ID	Release	Mapping score
ENSG00000105132.1	ENSG00000105132.1	3	0
ENSG00000105132.1	ENSG00000105132.2	15	0
ENSG00000105132.2	ENSG00000105132.3	21	0
ENSG00000105132.3	ENSG00000105132.4	26	0
ENSG00000105132.4	ENSG00000105132.5	38	0
ENSG00000105132.5	ENSG00000105132.6	47	0.941173
ENSG00000105132.6	ENSG00000105132.7	55	0.98205
ENSG00000105132.7	ENSG00000105132.8	62	0.996064
ENSG00000105132.8	<retired>	70	0
Old stable ID	New stable ID	Release	Mapping score
ENSG00000105216.1	ENSG00000105216.1	3	0
ENSG00000105216.1	ENSG00000105216.2	15	0
ENSG00000105216.2	ENSG00000105216.3	26	0
ENSG00000105216.3	ENSG00000105216.4	47	0.798427
ENSG00000105216.4	ENSG00000105216.5	50	0.928839
ENSG00000105216.5	ENSG00000105216.6	55	0.918508
ENSG00000105216.6	ENSG00000105216.7	62	0.967052
ENSG00000105216.7	<retired>	64	0
Old stable ID	New stable ID	Release	Mapping score
ENSG00000105972.1	ENSG00000105972.1	3	0
ENSG00000105972.1	ENSG00000105972.2	21	0
ENSG00000105972.2	ENSG00000105972.3	26	0
ENSG00000105972.3	ENSG00000105972.4	38	0
ENSG00000105972.4	ENSG00000105972.5	50	0.768653
ENSG00000105972.5	<retired>	55	0
Old stable ID	New stable ID	Release	Mapping score
ENSG00000107623.1	ENSG00000107623.1	3	0
ENSG00000107623.1	ENSG00000107623.2	38	0
ENSG00000107623.2	ENSG00000107623.3	56	0.979298
ENSG00000107623.3	ENSG00000107623.4	71	0.953218
ENSG00000107623.4	<retired>	76	0
ENSG00000107623.4	ENSG00000266524.2	76	1
Old stable ID	New stable ID	Release	Mapping score
ENSG00000108264.1	ENSG00000108264.1	3	0
ENSG00000108264.1	ENSG00000108264.2	15	0
ENSG00000108264.1	<retired>	76	0
ENSG00000108264.2	ENSG00000108264.3	21	0
ENSG00000108264.3	ENSG00000108264.4	26	0
ENSG00000108264.4	ENSG00000108264.5	38	0
ENSG00000108264.5	ENSG00000108264.6	47	0.464054
ENSG00000108264.6	ENSG00000108264.7	55	0.970027
ENSG00000108264.7	ENSG00000108264.8	56	0.969018
ENSG00000108264.8	ENSG00000108264.9	61	0.973134
ENSG00000108264.9	ENSG00000108264.10	62	0.981972
ENSG00000108264.10	ENSG00000108264.10	63	0.998024
ENSG00000108264.10	ENSG00000108264.11	68	0.981972
ENSG00000108264.11	ENSG00000108264.12	69	0.793926
ENSG00000108264.12	<retired>	76	0
Old stable ID	New stable ID	Release	Mapping score
ENSG00000108270.1	ENSG00000108270.1	3	0
ENSG00000108270.1	ENSG00000108270.2	26	0
ENSG00000108270.2	ENSG00000108270.3	38	0
ENSG00000108270.3	ENSG00000108270.4	40	0.546728
ENSG00000108270.4	ENSG00000108270.5	47	0.538822
ENSG00000108270.5	ENSG00000108270.6	69	0.596289
ENSG00000108270.6	<retired>	76	0
Old stable ID	New stable ID	Release	Mapping score
ENSG00000108292.1	ENSG00000108292.1	3	0
ENSG00000108292.1	ENSG00000108292.2	15	0
ENSG00000108292.1	<retired>	76	0
ENSG00000108292.2	ENSG00000108292.3	26	0
ENSG00000108292.3	ENSG00000108292.4	27	0
ENSG00000108292.4	ENSG00000108292.5	38	0
ENSG00000108292.5	ENSG00000108292.6	47	0.657773
ENSG00000108292.6	ENSG00000108292.7	50	0.885171
ENSG00000108292.7	ENSG00000108292.8	55	0.957944
ENSG00000108292.8	ENSG00000108292.9	56	0.807964
ENSG00000108292.9	ENSG00000108292.10	58	0.997549
ENSG00000108292.10	ENSG00000108292.11	62	0.98759
ENSG00000108292.11	ENSG00000108292.12	68	0.927313
ENSG00000108292.12	<retired>	76	0
Old stable ID	New stable ID	Release	Mapping score
ENSG00000108294.1	ENSG00000108294.1	3	0
ENSG00000108294.1	ENSG00000108294.2	21	0
ENSG00000108294.2	ENSG00000108294.3	56	0.995478
ENSG00000108294.3	ENSG00000108294.4	68	0.81556
ENSG00000108294.4	<retired>	76	0
Old stable ID	New stable ID	Release	Mapping score
ENSG00000108296.1	ENSG00000108296.1	3	0
ENSG00000108296.1	ENSG00000108296.2	26	0
ENSG00000108296.2	ENSG00000108296.3	55	0.958047
ENSG00000108296.3	ENSG00000108296.4	62	0.961452
ENSG00000108296.4	ENSG00000108296.5	68	0.818393
ENSG00000108296.5	ENSG00000108296.6	69	0.999586
ENSG00000108296.6	ENSG00000108296.7	74	0.976211
ENSG00000108296.7	<retired>	76	0
Old stable ID	New stable ID	Release	Mapping score
ENSG00000108504.1	ENSG00000108504.1	3	0
ENSG00000108504.1	ENSG00000108504.2	15	0
ENSG00000108504.2	ENSG00000108504.3	18.1	0
ENSG00000108504.3	ENSG00000108504.4	21	0
ENSG00000108504.4	ENSG00000108504.5	26	0
ENSG00000108504.5	ENSG00000108504.6	47	0.995531
ENSG00000108504.6	ENSG00000108504.7	55	0.854799
ENSG00000108504.7	ENSG00000108504.8	58	0.886907
ENSG00000108504.8	ENSG00000108504.9	63	0.932642
Old stable ID	New stable ID	Release	Mapping score
ENSG00000108753.1	ENSG00000108753.1	3	0
ENSG00000108753.1	ENSG00000108753.2	50	0.99533
ENSG00000108753.2	ENSG00000108753.3	55	0.918825
ENSG00000108753.3	ENSG00000108753.4	56	0.836732
ENSG00000108753.4	ENSG00000108753.5	62	0.929671
ENSG00000108753.5	ENSG00000108753.6	65	0.99187
ENSG00000108753.6	ENSG00000108753.7	68	0.991411
ENSG00000108753.7	ENSG00000108753.8	73	0.999958
ENSG00000108753.8	<retired>	76	0
Old stable ID	New stable ID	Release	Mapping score
ENSG00000110347.1	ENSG00000110347.1	3	0
ENSG00000110347.1	ENSG00000110347.2	15	0
ENSG00000110347.2	ENSG00000110347.3	26	0
ENSG00000110347.3	ENSG00000110347.4	38	0
ENSG00000110347.4	ENSG00000110347.5	47	0.955693
ENSG00000110347.5	ENSG00000110347.6	61	0.964135
ENSG00000110347.6	ENSG00000110347.7	62	0.992295
ENSG00000110347.7	ENSG00000262406.2	76	1
ENSG00000110347.7	<retired>	76	0
Old stable ID	New stable ID	Release	Mapping score
ENSG00000112049.1	ENSG00000112049.1	3	0
ENSG00000112049.1	ENSG00000112049.2	15	0
ENSG00000112049.2	ENSG00000112049.3	21	0
ENSG00000112049.3	ENSG00000112049.4	26	0
ENSG00000112049.4	ENSG00000112049.5	38	0
ENSG00000112049.5	ENSG00000112049.6	47	0.999487
ENSG00000112049.6	ENSG00000234876.1	55	0.937849
ENSG00000112049.6	<retired>	55	0
ENSG00000112049.6	ENSG00000232339.1	55	0.928796
ENSG00000112049.6	ENSG00000235396.1	55	0.938218
ENSG00000112049.6	ENSG00000223355.1	55	0.937849
Old stable ID	New stable ID	Release	Mapping score
ENSG00000112498.1	ENSG00000112498.1	3	0
ENSG00000112498.1	ENSG00000112498.2	15	0
ENSG00000112498.2	ENSG00000112498.3	18.1	0
ENSG00000112498.3	ENSG00000112498.4	26	0
ENSG00000112498.4	ENSG00000112498.5	38	0
ENSG00000112498.5	ENSG00000112498.6	47	0.473299
ENSG00000112498.6	ENSG00000237829.1	55	0.996564
ENSG00000112498.6	ENSG00000234058.1	55	0.996564
ENSG00000112498.6	<retired>	55	0
ENSG00000112498.6	ENSG00000237403.1	55	0.996564
ENSG00000112498.6	ENSG00000233314.1	55	0.996564
ENSG00000112498.6	ENSG00000236560.1	55	0.996513
ENSG00000112498.6	ENSG00000227720.1	55	0.996564
Old stable ID	New stable ID	Release	Mapping score
ENSG00000112664.1	ENSG00000112664.1	3	0
ENSG00000112664.1	ENSG00000112664.2	38	0
ENSG00000112664.2	ENSG00000112664.3	47	0.993742
ENSG00000112664.3	ENSG00000112664.4	56	0.993729
ENSG00000112664.4	<retired>	73	0
Old stable ID	New stable ID	Release	Mapping score
ENSG00000112727.1	ENSG00000112727.1	3	0
ENSG00000112727.1	ENSG00000256316.1	62	0.937286
ENSG00000112727.1	<retired>	62	0
ENSG00000112727.1	ENSG00000256018.1	62	0.933941
Old stable ID	New stable ID	Release	Mapping score
ENSG00000117289.1	ENSG00000117289.1	3	0
ENSG00000117289.1	ENSG00000117289.2	26	0
ENSG00000117289.2	ENSG00000117289.3	38	0
ENSG00000117289.3	ENSG00000117289.4	47	0.961137
ENSG00000117289.4	ENSG00000117289.5	55	0.790027
ENSG00000117289.5	ENSG00000117289.6	56	0.89833
ENSG00000117289.6	ENSG00000117289.7	62	0.981068
ENSG00000117289.7	<retired>	76	0
Old stable ID	New stable ID	Release	Mapping score
ENSG00000120087.1	ENSG00000120087.1	3	0
ENSG00000120087.1	ENSG00000120087.2	15	0
ENSG00000120087.2	ENSG00000120087.3	38	0
ENSG00000120087.3	ENSG00000120087.4	47	0.996334
ENSG00000120087.4	ENSG00000120087.5	56	0.861143
ENSG00000120087.5	ENSG00000120087.6	63	0.985464
ENSG00000120087.6	ENSG00000120087.7	67	0.999139
ENSG00000120087.7	ENSG00000120087.8	68	0.977046
ENSG00000120087.8	<retired>	72	0
Old stable ID	New stable ID	Release	Mapping score
ENSG00000120586.1	ENSG00000120586.1	3	0
ENSG00000120586.1	ENSG00000120586.2	15	0
ENSG00000120586.2	ENSG00000120586.3	38	0
ENSG00000120586.3	ENSG00000120586.4	40	0.666667
ENSG00000120586.4	<retired>	76	0
ENSG00000120586.4	ENSG00000260314.2	76	1
Old stable ID	New stable ID	Release	Mapping score
ENSG00000121031.1	ENSG00000121031.1	3	0
ENSG00000121031.1	ENSG00000121031.2	15	0
ENSG00000121031.2	ENSG00000121031.3	21	0
ENSG00000121031.3	ENSG00000121031.4	26	0
ENSG00000121031.4	ENSG00000121031.5	38	0
ENSG00000121031.5	<retired>	62	0
Old stable ID	New stable ID	Release	Mapping score
ENSG00000121083.1	ENSG00000121083.1	3	0
ENSG00000121083.1	ENSG00000121083.2	26	0
ENSG00000121083.2	ENSG00000121083.3	38	0
ENSG00000121083.3	ENSG00000121083.4	47	0.995018
ENSG00000121083.4	ENSG00000121083.5	62	0.627592
ENSG00000121083.5	ENSG00000121083.6	68	0.813273
ENSG00000121083.6	<retired>	74	0
Old stable ID	New stable ID	Release	Mapping score
ENSG00000121848.1	ENSG00000121848.1	3	0
ENSG00000121848.1	ENSG00000121848.2	21	0
ENSG00000121848.2	ENSG00000121848.3	38	0
ENSG00000121848.3	ENSG00000121848.4	47	0.767136
ENSG00000121848.4	ENSG00000121848.5	55	0.984848
ENSG00000121848.5	ENSG00000121848.6	56	0.72332
ENSG00000121848.6	ENSG00000121848.7	61	0.882104
ENSG00000121848.7	ENSG00000121848.8	62	0.882295
ENSG00000121848.8	ENSG00000121848.9	74	0.766525
ENSG00000121848.9	<retired>	76	0
Old stable ID	New stable ID	Release	Mapping score
ENSG00000122854.1	ENSG00000122854.1	3	0
ENSG00000122854.1	ENSG00000122854.2	26	0
ENSG00000122854.2	ENSG00000122854.3	38	0
ENSG00000122854.3	ENSG00000122854.4	47	0.988313
ENSG00000122854.4	ENSG00000122854.5	50	0.988983
ENSG00000122854.5	<retired>	55	0
Old stable ID	New stable ID	Release	Mapping score
ENSG00000124529.1	ENSG00000124529.1	3	0
ENSG00000124529.1	ENSG00000124529.2	47	0.843384
ENSG00000124529.2	ENSG00000124529.3	55	0.928612
ENSG00000124529.3	ENSG00000273542.1	76	0.932735
ENSG00000124529.3	ENSG00000278637.1	76	0.932735
ENSG00000124529.3	ENSG00000275126.1	76	0.932735
ENSG00000124529.3	<retired>	76	0
ENSG00000124529.3	ENSG00000277157.1	76	0.932735
ENSG00000124529.3	ENSG00000274618.1	76	0.932735
ENSG00000124529.3	ENSG00000278705.1	76	0.907534
ENSG00000124529.3	ENSG00000276966.1	76	0.932735
Old stable ID	New stable ID	Release	Mapping score
ENSG00000124578.1	ENSG00000124578.1	3	0
ENSG00000124578.1	ENSG00000124578.2	26	0
ENSG00000124578.2	ENSG00000124578.3	55	0.92613
ENSG00000124578.3	ENSG00000124578.4	62	0.863698
ENSG00000124578.4	<retired>	76	0
ENSG00000124578.4	ENSG00000278637.1	76	0.909621
ENSG00000124578.4	ENSG00000274618.1	76	0.909621
ENSG00000124578.4	ENSG00000275663.1	76	0.897059
ENSG00000124578.4	ENSG00000273542.1	76	0.909621
ENSG00000124578.4	ENSG00000275126.1	76	0.909621
Old stable ID	New stable ID	Release	Mapping score
ENSG00000124693.1	ENSG00000124693.1	3	0
ENSG00000124693.1	ENSG00000124693.2	62	0.95473
ENSG00000124693.2	ENSG00000274750.1	76	0.930917
ENSG00000124693.2	ENSG00000275714.1	76	0.930917
ENSG00000124693.2	ENSG00000274267.1	76	0.935381
ENSG00000124693.2	ENSG00000278272.1	76	0.930917
ENSG00000124693.2	ENSG00000275379.1	76	0.930917
ENSG00000124693.2	<retired>	76	0
ENSG00000124693.2	ENSG00000277775.1	76	0.930917
Old stable ID	New stable ID	Release	Mapping score
ENSG00000127388.1	ENSG00000127388.1	3	0
ENSG00000127388.1	ENSG00000127388.2	26	0
ENSG00000127388.2	ENSG00000127388.3	38	0
ENSG00000127388.3	ENSG00000127388.4	47	0.703254
ENSG00000127388.4	<retired>	55	0
Old stable ID	New stable ID	Release	Mapping score
ENSG00000128802.1	ENSG00000128802.1	3	0
ENSG00000128802.1	ENSG00000128802.2	38	0
ENSG00000128802.2	ENSG00000128802.3	40	0.666667
ENSG00000128802.3	ENSG00000263761.2	76	1
ENSG00000128802.3	<retired>	76	0
Old stable ID	New stable ID	Release	Mapping score
ENSG00000129270.1	ENSG00000129270.1	3	0
ENSG00000129270.1	ENSG00000129270.2	15	0
ENSG00000129270.1	<retired>	76	0
ENSG00000129270.2	ENSG00000129270.3	18.1	0
ENSG00000129270.3	ENSG00000129270.4	21	0
ENSG00000129270.4	ENSG00000129270.5	26	0
ENSG00000129270.5	ENSG00000129270.6	38	0
ENSG00000129270.6	ENSG00000129270.7	47	0.929444
ENSG00000129270.7	ENSG00000129270.8	55	0.88101
ENSG00000129270.8	ENSG00000129270.9	62	0.953833
ENSG00000129270.9	ENSG00000129270.9	63	0.997154
ENSG00000129270.9	ENSG00000129270.10	68	0.648839
ENSG00000129270.10	ENSG00000129270.11	69	0.521156
ENSG00000129270.11	<retired>	76	0
Old stable ID	New stable ID	Release	Mapping score
ENSG00000129282.1	ENSG00000129282.1	3	0
ENSG00000129282.1	ENSG00000129282.2	18.2	0
ENSG00000129282.2	ENSG00000129282.3	21	0
ENSG00000129282.3	ENSG00000129282.4	26	0
ENSG00000129282.4	ENSG00000129282.5	38	0
ENSG00000129282.5	ENSG00000129282.6	40	0.474116
ENSG00000129282.6	ENSG00000129282.7	47	0.458663
ENSG00000129282.7	ENSG00000129282.8	69	0.968091
ENSG00000129282.8	<retired>	76	0
Old stable ID	New stable ID	Release	Mapping score
ENSG00000130201.1	ENSG00000130201.1	3	0
ENSG00000130201.1	ENSG00000130201.2	26	0
ENSG00000130201.2	ENSG00000130201.3	55	0.991446
ENSG00000130201.3	ENSG00000130201.4	76	1
ENSG00000130201.4	ENSG00000130201.5	77	1
ENSG00000130201.5	ENSG00000130201.6	79	1
ENSG00000130201.6	ENSG00000130201.7	81	1
ENSG00000130201.7	ENSG00000130201.8	85	0.882812
ENSG00000130201.8	<retired>	88	0
Old stable ID	New stable ID	Release	Mapping score
ENSG00000131003.1	ENSG00000131003.1	3	0
ENSG00000131003.1	ENSG00000131003.2	15	0
ENSG00000131003.2	ENSG00000131003.3	18.1	0
ENSG00000131003.3	ENSG00000131003.4	18.2	0
ENSG00000131003.4	ENSG00000131003.5	21	0
ENSG00000131003.5	ENSG00000131003.6	26	0
ENSG00000131003.6	ENSG00000131003.7	38	0
ENSG00000131003.7	<retired>	55	0
Old stable ID	New stable ID	Release	Mapping score
ENSG00000131795.1	ENSG00000131795.1	3	0
ENSG00000131795.1	ENSG00000131795.2	15	0
ENSG00000131795.2	ENSG00000131795.3	26	0
ENSG00000131795.3	ENSG00000131795.4	38	0
ENSG00000131795.4	ENSG00000131795.5	50	0.826482
ENSG00000131795.5	ENSG00000131795.6	55	0.986851
ENSG00000131795.6	ENSG00000131795.7	56	0.910304
ENSG00000131795.7	ENSG00000131795.8	74	0.866831
ENSG00000131795.8	<retired>	76	0
Old stable ID	New stable ID	Release	Mapping score
ENSG00000132130.1	ENSG00000132130.1	3	0
ENSG00000132130.1	ENSG00000132130.2	38	0
ENSG00000132130.2	ENSG00000132130.3	55	0.935247
ENSG00000132130.3	ENSG00000132130.4	56	0.881915
ENSG00000132130.4	ENSG00000132130.5	62	0.896444
ENSG00000132130.5	ENSG00000132130.6	65	0.770744
ENSG00000132130.6	ENSG00000132130.7	69	0.906247
ENSG00000132130.7	<retired>	76	0
Old stable ID	New stable ID	Release	Mapping score
ENSG00000132142.1	ENSG00000132142.1	3	0
ENSG00000132142.1	ENSG00000132142.2	15	0
ENSG00000132142.1	<retired>	76	0
ENSG00000132142.2	ENSG00000132142.3	18.1	0
ENSG00000132142.3	ENSG00000132142.4	18.2	0
ENSG00000132142.4	ENSG00000132142.5	21	0
ENSG00000132142.6	ENSG00000132142.7	26	0
ENSG00000132142.7	ENSG00000132142.8	27	0
ENSG00000132142.8	ENSG00000132142.9	38	0
ENSG00000132142.9	ENSG00000132142.10	47	0.780157
ENSG00000132142.10	ENSG00000132142.11	55	0.975539
ENSG00000132142.11	ENSG00000132142.12	56	0.999724
ENSG00000132142.12	ENSG00000132142.13	62	0.988496
ENSG00000132142.13	ENSG00000132142.14	68	0.992504
ENSG00000132142.14	ENSG00000132142.15	69	0.901883
ENSG00000132142.15	<retired>	76	0
Old stable ID	New stable ID	Release	Mapping score
ENSG00000132498.1	ENSG00000132498.1	3	0
ENSG00000132498.1	ENSG00000132498.2	38	0
ENSG00000132498.2	ENSG00000132498.3	40	0.666667
ENSG00000132498.3	ENSG00000132498.4	56	0.826134
ENSG00000132498.4	ENSG00000132498.5	69	0.823839
ENSG00000132498.5	ENSG00000132498.6	71	0.953548
ENSG00000132498.6	ENSG00000132498.7	74	0.981528
ENSG00000132498.7	<retired>	76	0
Old stable ID	New stable ID	Release	Mapping score
ENSG00000135213.1	ENSG00000135213.1	3	0
ENSG00000135213.1	ENSG00000135213.2	15	0
ENSG00000135213.2	ENSG00000135213.3	38	0
ENSG00000135213.3	ENSG00000135213.4	47	0.934022
ENSG00000135213.4	ENSG00000135213.5	50	0.99954
ENSG00000135213.5	ENSG00000135213.6	55	0.882109
ENSG00000135213.6	ENSG00000135213.7	56	0.888515
ENSG00000135213.7	ENSG00000135213.8	61	0.978674
ENSG00000135213.8	<retired>	76	0
Old stable ID	New stable ID	Release	Mapping score
ENSG00000135847.1	ENSG00000135847.1	3	0
ENSG00000135847.1	ENSG00000135847.2	38	0
ENSG00000135847.2	ENSG00000135847.3	47	0.97336
ENSG00000135847.3	ENSG00000135847.4	56	0.773219
ENSG00000135847.4	ENSG00000135847.5	71	0.999698
ENSG00000135847.5	<retired>	76	0
Old stable ID	New stable ID	Release	Mapping score
ENSG00000136653.1	ENSG00000136653.1	3	0
ENSG00000136653.1	ENSG00000136653.2	15	0
ENSG00000136653.1	<retired>	76	0
ENSG00000136653.2	ENSG00000136653.3	18.1	0
ENSG00000136653.3	ENSG00000136653.4	18.2	0
ENSG00000136653.4	ENSG00000136653.5	21	0
ENSG00000136653.5	ENSG00000136653.6	26	0
ENSG00000136653.6	ENSG00000136653.7	27	0
ENSG00000136653.7	ENSG00000136653.8	38	0
ENSG00000136653.8	ENSG00000136653.9	40	0.899117
ENSG00000136653.9	ENSG00000136653.10	47	0.80022
ENSG00000136653.10	ENSG00000136653.11	55	0.998244
ENSG00000136653.11	ENSG00000136653.12	56	0.909726
ENSG00000136653.12	ENSG00000136653.13	62	0.998639
ENSG00000136653.13	ENSG00000136653.14	68	0.995523
ENSG00000136653.14	ENSG00000136653.15	74	0.980244
ENSG00000136653.15	<retired>	76	0
Old stable ID	New stable ID	Release	Mapping score
ENSG00000136805.1	ENSG00000136805.1	3	0
ENSG00000136805.1	ENSG00000136805.2	38	0
ENSG00000136805.2	ENSG00000136805.3	47	0.893142
ENSG00000136805.3	ENSG00000136805.4	56	0.893142
ENSG00000136805.4	<retired>	74	0
Old stable ID	New stable ID	Release	Mapping score
ENSG00000137259.1	ENSG00000137259.1	3	0
ENSG00000137259.1	ENSG00000137259.2	55	0.932344
ENSG00000137259.2	ENSG00000275221.1	76	0.898851
ENSG00000137259.2	ENSG00000278677.1	76	0.903448
ENSG00000137259.2	ENSG00000276903.1	76	0.903448
ENSG00000137259.2	ENSG00000274997.1	76	0.886574
ENSG00000137259.2	ENSG00000278463.1	76	0.91195
ENSG00000137259.2	ENSG00000276368.1	76	0.888889
ENSG00000137259.2	<retired>	76	0
ENSG00000137259.2	ENSG00000277075.1	76	0.903448
Old stable ID	New stable ID	Release	Mapping score
ENSG00000137330.1	ENSG00000137330.1	3	0
ENSG00000137330.1	ENSG00000137330.2	15	0
ENSG00000137330.2	ENSG00000137330.3	38	0
ENSG00000137330.3	ENSG00000137330.4	47	0.406922
ENSG00000137330.4	<retired>	55	0
ENSG00000137330.4	ENSG00000233813.1	55	0.976103
ENSG00000137330.4	ENSG00000226111.1	55	0.976103
ENSG00000137330.4	ENSG00000229861.1	55	0.976103
ENSG00000137330.4	ENSG00000223775.1	55	0.976103
ENSG00000137330.4	ENSG00000227420.1	55	0.976103
Old stable ID	New stable ID	Release	Mapping score
ENSG00000137379.1	ENSG00000137379.1	3	0
ENSG00000137379.1	ENSG00000137379.2	26	0
ENSG00000137379.2	ENSG00000137379.3	38	0
ENSG00000137379.3	ENSG00000137379.4	47	0.372565
ENSG00000137379.4	<retired>	55	0
ENSG00000137379.4	ENSG00000232575.1	55	0.930336
ENSG00000137379.4	ENSG00000227739.1	55	0.930336
ENSG00000137379.4	ENSG00000232421.1	55	0.930336
ENSG00000137379.4	ENSG00000224156.1	55	0.930336
ENSG00000137379.4	ENSG00000235067.1	55	0.930336
ENSG00000137379.4	ENSG00000229684.1	55	0.930336
Old stable ID	New stable ID	Release	Mapping score
ENSG00000138041.1	ENSG00000138041.1	3	0
ENSG00000138041.1	ENSG00000138041.2	15	0
ENSG00000138041.1	<retired>	76	0
ENSG00000138041.2	ENSG00000138041.3	21	0
ENSG00000138041.3	ENSG00000138041.4	26	0
ENSG00000138041.4	ENSG00000138041.5	38	0
ENSG00000138041.5	ENSG00000138041.6	47	0.801152
ENSG00000138041.6	ENSG00000138041.7	50	0.996967
ENSG00000138041.7	ENSG00000138041.8	55	0.971243
ENSG00000138041.8	ENSG00000138041.9	56	0.902643
ENSG00000138041.9	ENSG00000138041.10	58	0.978293
ENSG00000138041.10	ENSG00000138041.11	62	0.994863
ENSG00000138041.11	<retired>	76	0
Old stable ID	New stable ID	Release	Mapping score
ENSG00000138297.1	ENSG00000138297.1	3	0
ENSG00000138297.1	ENSG00000138297.2	26	0
ENSG00000138297.2	ENSG00000138297.3	38	0
ENSG00000138297.3	ENSG00000138297.4	50	0.977691
ENSG00000138297.4	ENSG00000138297.5	55	0.90685
ENSG00000138297.5	ENSG00000138297.6	56	0.894975
ENSG00000138297.6	ENSG00000138297.7	58	0.996571
ENSG00000138297.7	ENSG00000138297.8	62	0.986348
ENSG00000138297.8	ENSG00000138297.9	68	0.990497
ENSG00000138297.9	<retired>	76	0
Old stable ID	New stable ID	Release	Mapping score
ENSG00000138784.1	ENSG00000138784.1	3	0
ENSG00000138784.1	ENSG00000138784.2	56	0.999652
ENSG00000138784.2	<retired>	58	0
Old stable ID	New stable ID	Release	Mapping score
ENSG00000139357.1	ENSG00000139357.1	3	0
ENSG00000139357.1	ENSG00000139357.2	26	0
ENSG00000139357.2	ENSG00000139357.3	47	0.965365
ENSG00000139357.3	ENSG00000139357.4	55	0.962538
ENSG00000139357.4	ENSG00000139357.5	62	0.954212
ENSG00000139357.5	<retired>	64	0
Old stable ID	New stable ID	Release	Mapping score
ENSG00000141141.1	ENSG00000141141.1	3	0
ENSG00000141141.1	ENSG00000141141.2	15	0
ENSG00000141141.1	<retired>	76	0
ENSG00000141141.2	ENSG00000141141.3	21	0
ENSG00000141141.4	ENSG00000141141.5	26	0
ENSG00000141141.5	ENSG00000141141.6	47	0.659949
ENSG00000141141.6	ENSG00000141141.7	55	0.988504
ENSG00000141141.7	ENSG00000141141.8	56	0.869678
ENSG00000141141.8	ENSG00000141141.9	62	0.988774
ENSG00000141141.9	ENSG00000141141.10	69	0.941145
ENSG00000141141.10	<retired>	76	0
Old stable ID	New stable ID	Release	Mapping score
ENSG00000141720.1	ENSG00000141720.1	3	0
ENSG00000141720.1	ENSG00000141720.2	21	0
ENSG00000141720.2	ENSG00000141720.3	26	0
ENSG00000141720.3	ENSG00000141720.4	38	0
ENSG00000141720.4	ENSG00000141720.5	47	0.882177
ENSG00000141720.5	ENSG00000141720.6	56	0.999858
ENSG00000141720.6	ENSG00000141720.7	68	0.923201
ENSG00000141720.7	<retired>	76	0
Old stable ID	New stable ID	Release	Mapping score
ENSG00000143466.1	ENSG00000143466.1	3	0
ENSG00000143466.1	ENSG00000143466.2	15	0
ENSG00000143466.2	ENSG00000143466.3	26	0
ENSG00000143466.3	ENSG00000143466.4	38	0
ENSG00000143466.4	ENSG00000143466.5	47	0.999089
ENSG00000143466.5	ENSG00000143466.6	56	0.830394
ENSG00000143466.6	ENSG00000143466.7	62	0.971529
ENSG00000143466.7	ENSG00000143466.8	71	0.995125
ENSG00000143466.8	ENSG00000143466.9	74	0.97019
ENSG00000143466.9	<retired>	76	0
Old stable ID	New stable ID	Release	Mapping score
ENSG00000147382.1	ENSG00000147382.1	3	0
ENSG00000147382.1	ENSG00000147382.2	15	0
ENSG00000147382.1	<retired>	76	0
ENSG00000147382.2	ENSG00000147382.3	18.1	0
ENSG00000147382.3	ENSG00000147382.4	18.2	0
ENSG00000147382.4	ENSG00000147382.5	21	0
ENSG00000147382.5	ENSG00000147382.6	26	0
ENSG00000147382.6	ENSG00000147382.7	27	0
ENSG00000147382.7	ENSG00000147382.8	38	0
ENSG00000147382.8	ENSG00000147382.9	47	0.871365
ENSG00000147382.9	ENSG00000147382.10	50	0.99101
ENSG00000147382.10	ENSG00000147382.11	55	0.945931
ENSG00000147382.11	ENSG00000147382.12	56	0.960001
ENSG00000147382.12	ENSG00000147382.13	62	0.997606
ENSG00000147382.13	ENSG00000147382.14	69	0.981897
ENSG00000147382.14	<retired>	76	0
Old stable ID	New stable ID	Release	Mapping score
ENSG00000147402.1	ENSG00000147402.1	3	0
ENSG00000147402.1	ENSG00000147402.2	15	0
ENSG00000147402.2	ENSG00000147402.3	26	0
ENSG00000147402.3	ENSG00000147402.4	38	0
ENSG00000147402.4	ENSG00000147402.5	47	0.996771
ENSG00000147402.5	ENSG00000147402.6	56	0.959274
ENSG00000147402.6	ENSG00000147402.7	68	0.980565
ENSG00000147402.7	<retired>	76	0
Old stable ID	New stable ID	Release	Mapping score
ENSG00000147507.1	ENSG00000147507.1	3	0
ENSG00000147507.1	ENSG00000147507.2	26	0
ENSG00000147507.2	ENSG00000147507.3	47	0.603362
ENSG00000147507.3	ENSG00000147507.4	50	0.857741
ENSG00000147507.4	ENSG00000147507.5	55	0.963113
ENSG00000147507.5	ENSG00000147507.6	60	0.975422
ENSG00000147507.6	<retired>	62	0
Old stable ID	New stable ID	Release	Mapping score
ENSG00000150086.1	ENSG00000150086.2	55	0.975694
ENSG00000150086.2	ENSG00000150086.3	56	0.976666
ENSG00000150086.3	<retired>	74	0
Old stable ID	New stable ID	Release	Mapping score
ENSG00000151514.1	ENSG00000151514.2	21	0
ENSG00000151514.2	ENSG00000151514.3	38	0
ENSG00000151514.3	ENSG00000151514.4	50	0.935172
ENSG00000151514.4	ENSG00000151514.5	55	0.951035
ENSG00000151514.5	ENSG00000151514.6	56	0.964175
ENSG00000151514.6	ENSG00000151514.7	62	0.977049
ENSG00000151514.7	<retired>	64	0
Old stable ID	New stable ID	Release	Mapping score
ENSG00000151539.1	ENSG00000151539.2	15	0
ENSG00000151539.2	ENSG00000151539.3	18.1	0
ENSG00000151539.4	ENSG00000151539.5	26	0
ENSG00000151539.5	ENSG00000151539.6	38	0
ENSG00000151539.6	ENSG00000151539.7	47	0.455719
ENSG00000151539.7	ENSG00000151539.8	55	0.960349
ENSG00000151539.8	ENSG00000151539.9	58	0.804685
ENSG00000151539.9	ENSG00000151539.10	60	0.804685
ENSG00000151539.10	<retired>	62	0
Old stable ID	New stable ID	Release	Mapping score
ENSG00000151792.1	ENSG00000151792.2	26	0
ENSG00000151792.2	ENSG00000151792.3	47	0.665204
ENSG00000151792.3	ENSG00000151792.4	55	0.989324
ENSG00000151792.4	ENSG00000151792.5	58	0.972987
ENSG00000151792.5	ENSG00000151792.6	62	0.934592
ENSG00000151792.6	<retired>	64	0
Old stable ID	New stable ID	Release	Mapping score
ENSG00000152268.1	ENSG00000152268.2	15	0
ENSG00000152268.2	ENSG00000152268.3	26	0
ENSG00000152268.3	ENSG00000152268.4	47	0.94712
ENSG00000152268.4	ENSG00000152268.5	50	0.959068
ENSG00000152268.5	ENSG00000152268.6	55	0.622192
ENSG00000152268.6	ENSG00000152268.7	61	0.832416
ENSG00000152268.7	ENSG00000152268.8	62	0.957153
ENSG00000152268.8	ENSG00000152268.8	63	0.984465
ENSG00000152268.8	<retired>	76	0
Old stable ID	New stable ID	Release	Mapping score
ENSG00000152428.1	ENSG00000152428.2	21	0
ENSG00000152428.2	ENSG00000152428.3	26	0
ENSG00000152428.3	ENSG00000152428.4	38	0
ENSG00000152428.4	ENSG00000152428.5	55	0.999339
ENSG00000152428.5	<retired>	62	0
Old stable ID	New stable ID	Release	Mapping score
ENSG00000153807.1	ENSG00000153807.2	38	0
ENSG00000153807.2	ENSG00000153807.3	47	0.697943
ENSG00000153807.3	ENSG00000153807.4	55	0.876263
ENSG00000153807.4	ENSG00000153807.5	56	0.890842
ENSG00000153807.5	<retired>	58	0
Old stable ID	New stable ID	Release	Mapping score
ENSG00000154035.1	ENSG00000154035.2	15	0
ENSG00000154035.2	ENSG00000154035.3	26	0
ENSG00000154035.3	ENSG00000154035.4	47	0.159341
ENSG00000154035.4	ENSG00000154035.5	55	0.934693
ENSG00000154035.5	ENSG00000154035.6	56	0.961963
ENSG00000154035.6	<retired>	76	0
Old stable ID	New stable ID	Release	Mapping score
ENSG00000155984.1	ENSG00000155984.2	15	0
ENSG00000155984.1	<retired>	76	0
ENSG00000155984.2	ENSG00000155984.3	38	0
ENSG00000155984.3	ENSG00000155984.4	47	0.999823
ENSG00000155984.4	ENSG00000155984.5	55	0.99858
ENSG00000155984.5	ENSG00000155984.6	58	0.68596
ENSG00000155984.6	ENSG00000155984.7	60	0.849616
ENSG00000155984.7	ENSG00000155984.8	62	0.992401
ENSG00000155984.8	ENSG00000155984.9	68	0.996576
ENSG00000155984.9	ENSG00000155984.10	74	0.977962
ENSG00000155984.10	<retired>	76	0
Old stable ID	New stable ID	Release	Mapping score
ENSG00000157828.1	ENSG00000157828.2	26	0
ENSG00000157828.2	ENSG00000157828.3	38	0
ENSG00000157828.3	ENSG00000157828.4	47	0.639729
ENSG00000157828.4	ENSG00000157828.5	56	0.939286
ENSG00000157828.5	<retired>	77	0
ENSG00000157828.5	ENSG00000280146.1	77	1
ENSG00000157828.5	ENSG00000279854.1	77	1
Old stable ID	New stable ID	Release	Mapping score
ENSG00000160828.1	ENSG00000160828.2	15	0
ENSG00000160828.1	<retired>	76	0
ENSG00000160828.2	ENSG00000160828.3	18.1	0
ENSG00000160828.3	ENSG00000160828.4	21	0
ENSG00000160828.4	ENSG00000160828.5	26	0
ENSG00000160828.5	ENSG00000160828.6	27	0
ENSG00000160828.6	ENSG00000160828.7	38	0
ENSG00000160828.7	ENSG00000160828.8	47	0.732164
ENSG00000160828.8	ENSG00000160828.9	50	0.778372
ENSG00000160828.9	ENSG00000160828.10	55	0.725089
ENSG00000160828.10	ENSG00000160828.11	56	0.963169
ENSG00000160828.11	ENSG00000160828.12	62	0.97545
ENSG00000160828.12	ENSG00000160828.13	67	0.890032
ENSG00000160828.13	<retired>	76	0
Old stable ID	New stable ID	Release	Mapping score
ENSG00000160967.1	ENSG00000160967.2	15	0
ENSG00000160967.2	ENSG00000160967.3	18.1	0
ENSG00000160967.3	ENSG00000160967.4	18.2	0
ENSG00000160967.4	ENSG00000160967.5	21	0
ENSG00000160967.5	ENSG00000160967.6	26	0
ENSG00000160967.6	ENSG00000160967.7	38	0
ENSG00000160967.7	ENSG00000160967.8	47	0.826073
ENSG00000160967.8	ENSG00000160967.9	50	0.996091
ENSG00000160967.9	ENSG00000160967.10	55	0.990215
ENSG00000160967.10	ENSG00000160967.11	56	0.919863
ENSG00000160967.11	ENSG00000160967.12	62	0.99443
ENSG00000160967.12	ENSG00000160967.12	63	0.99962
ENSG00000160967.12	<retired>	64	0
Old stable ID	New stable ID	Release	Mapping score
ENSG00000161326.1	ENSG00000161326.2	26	0
ENSG00000161326.2	ENSG00000161326.3	38	0
ENSG00000161326.3	ENSG00000161326.4	47	0.488185
ENSG00000161326.4	ENSG00000161326.5	50	0.991513
ENSG00000161326.5	ENSG00000161326.6	55	0.994622
ENSG00000161326.6	ENSG00000161326.7	56	0.970933
ENSG00000161326.7	ENSG00000161326.8	62	0.998444
ENSG00000161326.8	<retired>	76	0
Old stable ID	New stable ID	Release	Mapping score
ENSG00000161583.1	ENSG00000161583.2	15	0
ENSG00000161583.1	<retired>	76	0
ENSG00000161583.2	ENSG00000161583.3	18.2	0
ENSG00000161583.3	ENSG00000161583.4	21	0
ENSG00000161583.4	ENSG00000161583.5	26	0
ENSG00000161583.5	ENSG00000161583.6	38	0
ENSG00000161583.6	ENSG00000161583.7	47	0.642399
ENSG00000161583.7	ENSG00000161583.8	50	0.998886
ENSG00000161583.8	ENSG00000161583.9	55	0.985613
ENSG00000161583.9	ENSG00000161583.10	56	0.9988
ENSG00000161583.10	ENSG00000161583.11	62	0.846121
ENSG00000161583.11	ENSG00000161583.12	69	0.861708
ENSG00000161583.12	<retired>	76	0
Old stable ID	New stable ID	Release	Mapping score
ENSG00000162290.1	ENSG00000162290.2	15	0
ENSG00000162290.1	<retired>	76	0
ENSG00000162290.2	ENSG00000162290.3	38	0
ENSG00000162290.3	ENSG00000162290.4	47	0.661973
ENSG00000162290.4	ENSG00000162290.5	50	0.862075
ENSG00000162290.5	ENSG00000162290.6	55	0.992176
ENSG00000162290.6	ENSG00000162290.7	56	0.990245
ENSG00000162290.7	ENSG00000162290.8	60	0.984476
ENSG00000162290.8	ENSG00000162290.9	61	0.994193
ENSG00000162290.9	ENSG00000162290.10	62	0.996394
ENSG00000162290.10	ENSG00000162290.10	63	0.999492
ENSG00000162290.10	ENSG00000162290.11	65	0.941308
ENSG00000162290.11	ENSG00000162290.12	73	0.999735
ENSG00000162290.12	<retired>	76	0
Old stable ID	New stable ID	Release	Mapping score
ENSG00000162647.1	ENSG00000162647.2	18.1	0
ENSG00000162647.2	ENSG00000162647.3	18.2	0
ENSG00000162647.3	ENSG00000162647.4	21	0
ENSG00000162647.4	ENSG00000162647.5	26	0
ENSG00000162647.5	ENSG00000162647.6	27	0
ENSG00000162647.6	ENSG00000162647.7	38	0
ENSG00000162647.7	ENSG00000162647.8	47	0.835363
ENSG00000162647.8	ENSG00000162647.9	50	0.961029
ENSG00000162647.9	<retired>	55	0
Old stable ID	New stable ID	Release	Mapping score
ENSG00000163067.1	ENSG00000163067.2	18.1	0
ENSG00000163067.1	<retired>	76	0
ENSG00000163067.2	ENSG00000163067.3	21	0
ENSG00000163067.3	ENSG00000163067.4	26	0
ENSG00000163067.4	ENSG00000163067.5	38	0
ENSG00000163067.5	ENSG00000163067.6	47	0.797971
ENSG00000163067.6	ENSG00000163067.7	50	0.977805
ENSG00000163067.7	ENSG00000163067.8	55	0.980856
ENSG00000163067.8	ENSG00000163067.9	56	0.980962
ENSG00000163067.9	ENSG00000163067.10	62	0.999566
ENSG00000163067.10	<retired>	76	0
Old stable ID	New stable ID	Release	Mapping score
ENSG00000163113.1	ENSG00000163113.2	15	0
ENSG00000163113.1	<retired>	76	0
ENSG00000163113.2	ENSG00000163113.3	26	0
ENSG00000163113.3	ENSG00000163113.4	38	0
ENSG00000163113.4	ENSG00000163113.5	47	0.788732
ENSG00000163113.5	ENSG00000163113.6	55	0.934274
ENSG00000163113.6	ENSG00000163113.7	56	0.827986
ENSG00000163113.7	ENSG00000163113.8	62	0.972772
ENSG00000163113.8	ENSG00000163113.9	68	0.972772
ENSG00000163113.9	ENSG00000163113.10	74	0.918868
ENSG00000163113.10	<retired>	76	0
Old stable ID	New stable ID	Release	Mapping score
ENSG00000163486.1	ENSG00000163486.2	26	0
ENSG00000163486.2	ENSG00000163486.3	38	0
ENSG00000163486.3	ENSG00000163486.4	47	0.999333
ENSG00000163486.4	ENSG00000163486.5	55	0.902384
ENSG00000163486.5	ENSG00000163486.6	56	0.949355
ENSG00000163486.6	ENSG00000163486.7	62	0.966217
ENSG00000163486.7	ENSG00000163486.8	72	0.988818
ENSG00000163486.8	<retired>	76	0
Old stable ID	New stable ID	Release	Mapping score
ENSG00000163526.1	ENSG00000163526.2	26	0
ENSG00000163526.2	ENSG00000163526.3	47	0.927168
ENSG00000163526.3	ENSG00000163526.4	55	0.908951
ENSG00000163526.4	<retired>	58	0
Old stable ID	New stable ID	Release	Mapping score
ENSG00000165659.1	ENSG00000165659.2	15	0
ENSG00000165659.1	<retired>	76	0
ENSG00000165659.2	ENSG00000165659.3	18.2	0
ENSG00000165659.3	ENSG00000165659.4	21	0
ENSG00000165659.5	ENSG00000165659.6	26	0
ENSG00000165659.6	ENSG00000165659.7	27	0
ENSG00000165659.7	ENSG00000165659.8	38	0
ENSG00000165659.8	ENSG00000165659.9	40	0.919787
ENSG00000165659.9	ENSG00000165659.10	47	0.734227
ENSG00000165659.10	ENSG00000165659.11	55	0.967839
ENSG00000165659.11	ENSG00000165659.12	68	0.983567
ENSG00000165659.12	<retired>	76	0
Old stable ID	New stable ID	Release	Mapping score
ENSG00000166748.1	ENSG00000166748.2	21	0
ENSG00000166748.2	ENSG00000166748.3	26	0
ENSG00000166748.3	ENSG00000166748.4	40	0.575192
ENSG00000166748.4	ENSG00000166748.5	47	0.706119
ENSG00000166748.5	ENSG00000166748.6	55	0.977192
ENSG00000166748.6	ENSG00000166748.7	62	0.973841
ENSG00000166748.7	ENSG00000166748.8	66	0.912829
ENSG00000166748.8	ENSG00000166748.9	76	0.972498
ENSG00000166748.9	ENSG00000166748.10	77	1
ENSG00000166748.10	ENSG00000166748.11	79	1
ENSG00000166748.11	ENSG00000166748.12	81	1
ENSG00000166748.12	ENSG00000166748.13	85	0.798226
ENSG00000166748.13	<retired>	88	0
Old stable ID	New stable ID	Release	Mapping score
ENSG00000167383.1	ENSG00000167383.2	38	0
ENSG00000167383.2	ENSG00000167383.3	47	0.997054
ENSG00000167383.3	ENSG00000167383.4	69	0.918708
ENSG00000167383.4	<retired>	76	0
Old stable ID	New stable ID	Release	Mapping score
ENSG00000167433.1	ENSG00000167433.2	21	0
ENSG00000167433.2	ENSG00000167433.3	27	0
ENSG00000167433.3	ENSG00000167433.4	38	0
ENSG00000167433.4	ENSG00000167433.5	47	0.992578
ENSG00000167433.5	ENSG00000167433.6	55	0.863899
ENSG00000167433.6	ENSG00000167433.7	62	0.498462
ENSG00000167433.7	<retired>	64	0
Old stable ID	New stable ID	Release	Mapping score
ENSG00000168242.1	ENSG00000168242.2	38	0
ENSG00000168242.2	ENSG00000168242.3	47	0.661094
ENSG00000168242.3	ENSG00000274290.1	76	0.890173
ENSG00000168242.3	ENSG00000278588.1	76	0.897704
ENSG00000168242.3	ENSG00000275713.1	76	0.886047
ENSG00000168242.3	ENSG00000273703.1	76	0.886047
ENSG00000168242.3	ENSG00000277224.1	76	0.886047
ENSG00000168242.3	ENSG00000274641.1	76	0.886047
ENSG00000168242.3	<retired>	76	0
ENSG00000168242.3	ENSG00000276410.1	76	0.886047
Old stable ID	New stable ID	Release	Mapping score
ENSG00000168274.1	ENSG00000168274.2	38	0
ENSG00000168274.2	ENSG00000168274.3	47	0.735709
ENSG00000168274.3	ENSG00000275221.1	76	0.831915
ENSG00000168274.3	ENSG00000277075.1	76	0.859232
ENSG00000168274.3	ENSG00000274997.1	76	0.820129
ENSG00000168274.3	ENSG00000278677.1	76	0.83617
ENSG00000168274.3	ENSG00000276903.1	76	0.83617
ENSG00000168274.3	<retired>	76	0
ENSG00000168274.3	ENSG00000278463.1	76	0.83617
Old stable ID	New stable ID	Release	Mapping score
ENSG00000168738.1	ENSG00000168738.2	26	0
ENSG00000168738.2	ENSG00000168738.3	38	0
ENSG00000168738.3	ENSG00000168738.4	47	0.729392
ENSG00000168738.4	<retired>	62	0
Old stable ID	New stable ID	Release	Mapping score
ENSG00000168775.1	ENSG00000168775.2	15	0
ENSG00000168775.2	ENSG00000168775.3	18.2	0
ENSG00000168775.3	ENSG00000168775.4	21	0
ENSG00000168775.4	ENSG00000168775.5	26	0
ENSG00000168775.5	ENSG00000168775.6	38	0
ENSG00000168775.6	ENSG00000168775.7	47	0.984652
ENSG00000168775.7	ENSG00000168775.8	50	0.976024
ENSG00000168775.8	ENSG00000237289.1	55	0.742464
ENSG00000168775.8	ENSG00000223572.1	55	0.847555
ENSG00000168775.8	<retired>	55	0
Old stable ID	New stable ID	Release	Mapping score
ENSG00000170616.1	ENSG00000170616.2	15	0
ENSG00000170616.2	ENSG00000170616.3	18.1	0
ENSG00000170616.3	ENSG00000170616.4	18.2	0
ENSG00000170616.4	ENSG00000170616.5	21	0
ENSG00000170616.5	ENSG00000170616.6	26	0
ENSG00000170616.6	ENSG00000170616.7	38	0
ENSG00000170616.7	ENSG00000170616.8	61	0.690706
ENSG00000170616.8	ENSG00000170616.9	73	0.680083
ENSG00000170616.9	ENSG00000261678.2	76	1
ENSG00000170616.9	<retired>	76	0
Old stable ID	New stable ID	Release	Mapping score
ENSG00000170727.1	ENSG00000170727.2	18.1	0
ENSG00000170727.2	ENSG00000170727.3	21	0
ENSG00000170727.3	ENSG00000170727.4	26	0
ENSG00000170727.4	ENSG00000170727.5	50	0.981784
ENSG00000170727.5	ENSG00000170727.6	55	0.990857
ENSG00000170727.6	ENSG00000170727.7	61	0.645399
ENSG00000170727.7	<retired>	76	0
ENSG00000170727.7	ENSG00000261236.2	76	1
Old stable ID	New stable ID	Release	Mapping score
ENSG00000170941.1	ENSG00000170941.2	15	0
ENSG00000170941.2	ENSG00000170941.3	50	0.753357
ENSG00000170941.3	ENSG00000170941.4	55	0.856601
ENSG00000170941.4	ENSG00000170941.5	58	0.992683
ENSG00000170941.5	ENSG00000170941.6	61	0.959024
ENSG00000170941.6	ENSG00000170941.7	62	0.0939449
ENSG00000170941.7	<retired>	73	0
Old stable ID	New stable ID	Release	Mapping score
ENSG00000171142.1	ENSG00000171142.2	38	0
ENSG00000171142.2	ENSG00000171142.3	47	0.716488
ENSG00000171142.3	ENSG00000171142.4	50	0.868525
ENSG00000171142.4	ENSG00000171142.5	55	0.868514
ENSG00000171142.5	ENSG00000171142.6	56	0.99899
ENSG00000171142.6	<retired>	60	0
Old stable ID	New stable ID	Release	Mapping score
ENSG00000171471.1	ENSG00000171471.2	26	0
ENSG00000171471.2	ENSG00000171471.3	47	0.742619
ENSG00000171471.3	ENSG00000171471.4	50	0.955928
ENSG00000171471.4	ENSG00000171471.5	64	0.985116
ENSG00000171471.5	ENSG00000171471.6	76	0.983088
ENSG00000171471.6	<retired>	79	0
Old stable ID	New stable ID	Release	Mapping score
ENSG00000172660.1	ENSG00000172660.2	27	0
ENSG00000172660.2	ENSG00000172660.3	47	0.666547
ENSG00000172660.3	ENSG00000172660.4	55	0.999613
ENSG00000172660.4	ENSG00000172660.5	62	0.974497
ENSG00000172660.5	ENSG00000172660.6	68	0.974497
ENSG00000172660.6	ENSG00000172660.7	69	0.64078
ENSG00000172660.7	<retired>	76	0
ENSG00000172660.7	ENSG00000270647.2	76	1
Old stable ID	New stable ID	Release	Mapping score
ENSG00000173088.1	ENSG00000173088.2	15	0
ENSG00000173088.2	ENSG00000173088.3	38	0
ENSG00000173088.3	ENSG00000173088.4	47	0.996009
ENSG00000173088.4	ENSG00000173088.5	55	0.906175
ENSG00000173088.5	ENSG00000173088.6	56	0.964657
ENSG00000173088.6	ENSG00000173088.7	62	0.934778
ENSG00000173088.7	ENSG00000173088.8	71	0.74335
ENSG00000173088.8	ENSG00000173088.9	76	0.97151
ENSG00000173088.9	ENSG00000173088.10	77	1
ENSG00000173088.10	ENSG00000173088.11	79	1
ENSG00000173088.11	ENSG00000173088.12	81	1
ENSG00000173088.12	<retired>	85	0
Old stable ID	New stable ID	Release	Mapping score
ENSG00000173566.1	ENSG00000173566.2	15	0
ENSG00000173566.2	ENSG00000173566.3	21	0
ENSG00000173566.3	ENSG00000173566.4	26	0
ENSG00000173566.4	ENSG00000173566.5	47	0.999755
ENSG00000173566.5	ENSG00000173566.6	55	0.670746
ENSG00000173566.6	ENSG00000173566.7	60	0.939619
ENSG00000173566.7	ENSG00000173566.8	62	0.987797
ENSG00000173566.8	ENSG00000173566.9	63	0.983939
ENSG00000173566.9	<retired>	76	0
Old stable ID	New stable ID	Release	Mapping score
ENSG00000174093.1	ENSG00000174093.2	15	0
ENSG00000174093.2	ENSG00000174093.3	26	0
ENSG00000174093.3	ENSG00000174093.4	55	0.631322
ENSG00000174093.4	ENSG00000174093.5	60	0.868182
ENSG00000174093.5	ENSG00000174093.6	62	0.996456
ENSG00000174093.6	<retired>	76	0
Old stable ID	New stable ID	Release	Mapping score
ENSG00000174100.1	ENSG00000174100.2	15	0
ENSG00000174100.2	ENSG00000174100.3	55	1
ENSG00000174100.3	ENSG00000174100.4	56	0.997394
ENSG00000174100.4	ENSG00000174100.5	68	0.76335
ENSG00000174100.5	<retired>	76	0
Old stable ID	New stable ID	Release	Mapping score
ENSG00000174111.1	ENSG00000174111.2	15	0
ENSG00000174111.2	ENSG00000174111.3	18.1	0
ENSG00000174111.3	ENSG00000174111.4	38	0
ENSG00000174111.4	ENSG00000174111.5	47	0.677384
ENSG00000174111.5	ENSG00000174111.6	62	0.992158
ENSG00000174111.6	ENSG00000174111.7	67	0.954524
ENSG00000174111.7	ENSG00000174111.8	68	0.86897
ENSG00000174111.8	<retired>	76	0
Old stable ID	New stable ID	Release	Mapping score
ENSG00000174194.1	ENSG00000174194.2	18.1	0
ENSG00000174194.1	<retired>	76	0
ENSG00000174194.2	ENSG00000174194.3	26	0
ENSG00000174194.3	ENSG00000174194.4	38	0
ENSG00000174194.4	ENSG00000174194.5	40	0.666667
ENSG00000174194.5	ENSG00000174194.6	47	0.998149
ENSG00000174194.6	ENSG00000174194.7	50	0.999589
ENSG00000174194.7	ENSG00000174194.8	55	0.959083
ENSG00000174194.8	ENSG00000174194.9	56	0.862824
ENSG00000174194.9	ENSG00000174194.10	68	0.96978
ENSG00000174194.10	ENSG00000174194.11	71	0.970399
ENSG00000174194.11	<retired>	76	0
Old stable ID	New stable ID	Release	Mapping score
ENSG00000174368.1	ENSG00000174368.2	15	0
ENSG00000174368.1	<retired>	76	0
ENSG00000174368.2	ENSG00000174368.3	18.2	0
ENSG00000174368.3	ENSG00000174368.4	21	0
ENSG00000174368.4	ENSG00000174368.5	26	0
ENSG00000174368.5	ENSG00000174368.6	38	0
ENSG00000174368.6	ENSG00000174368.7	47	0.797598
ENSG00000174368.7	ENSG00000174368.8	50	0.879512
ENSG00000174368.8	ENSG00000174368.9	55	0.870783
ENSG00000174368.9	ENSG00000174368.10	56	0.971431
ENSG00000174368.10	ENSG00000174368.11	58	0.971431
ENSG00000174368.11	ENSG00000174368.12	61	0.998264
ENSG00000174368.12	ENSG00000174368.13	62	0.663818
ENSG00000174368.13	<retired>	76	0
Old stable ID	New stable ID	Release	Mapping score
ENSG00000174374.1	ENSG00000174374.2	15	0
ENSG00000174374.2	ENSG00000174374.3	18.1	0
ENSG00000174374.3	ENSG00000174374.4	18.2	0
ENSG00000174374.4	ENSG00000174374.5	26	0
ENSG00000174374.5	ENSG00000174374.6	47	0.985969
ENSG00000174374.6	ENSG00000174374.7	55	0.915796
ENSG00000174374.7	ENSG00000174374.8	56	0.871124
ENSG00000174374.8	ENSG00000174374.9	62	0.911187
ENSG00000174374.9	<retired>	76	0
Old stable ID	New stable ID	Release	Mapping score
ENSG00000174595.1	ENSG00000174595.2	26	0
ENSG00000174595.2	ENSG00000174595.3	55	0.825478
ENSG00000174595.3	ENSG00000174595.4	62	0.963427
ENSG00000174595.4	ENSG00000266265.2	76	1
ENSG00000174595.4	<retired>	76	0
Old stable ID	New stable ID	Release	Mapping score
ENSG00000175176.1	ENSG00000175176.2	15	0
ENSG00000175176.2	ENSG00000175176.3	18.1	0
ENSG00000175176.3	ENSG00000175176.4	21	0
ENSG00000175176.4	ENSG00000175176.5	26	0
ENSG00000175176.5	ENSG00000175176.6	38	0
ENSG00000175176.6	ENSG00000175176.7	47	0.211555
ENSG00000175176.7	ENSG00000175176.8	55	0.916497
ENSG00000175176.8	ENSG00000175176.9	56	0.984014
ENSG00000175176.9	ENSG00000175176.10	60	0.956804
ENSG00000175176.10	<retired>	62	0
Old stable ID	New stable ID	Release	Mapping score
ENSG00000175388.1	ENSG00000175388.2	26	0
ENSG00000175388.2	ENSG00000175388.3	38	0
ENSG00000175388.3	ENSG00000175388.4	47	0.619837
ENSG00000175388.4	<retired>	62	0
Old stable ID	New stable ID	Release	Mapping score
ENSG00000175818.1	ENSG00000175818.2	15	0
ENSG00000175818.2	ENSG00000175818.3	38	0
ENSG00000175818.3	ENSG00000175818.4	55	0.647749
ENSG00000175818.4	ENSG00000175818.5	56	0.955104
ENSG00000175818.5	ENSG00000175818.6	60	0.969571
ENSG00000175818.6	<retired>	62	0
Old stable ID	New stable ID	Release	Mapping score
ENSG00000176201.1	ENSG00000176201.2	15	0
ENSG00000176201.2	ENSG00000176201.3	18.1	0
ENSG00000176201.3	ENSG00000176201.4	26	0
ENSG00000176201.4	ENSG00000176201.5	38	0
ENSG00000176201.5	ENSG00000176201.6	47	0.999529
ENSG00000176201.6	<retired>	55	0
Old stable ID	New stable ID	Release	Mapping score
ENSG00000176274.1	ENSG00000176274.2	15	0
ENSG00000176274.2	ENSG00000176274.3	21	0
ENSG00000176274.3	ENSG00000176274.4	38	0
ENSG00000176274.4	ENSG00000176274.5	47	0.99992
ENSG00000176274.5	ENSG00000176274.6	56	0.946264
ENSG00000176274.6	<retired>	76	0
Old stable ID	New stable ID	Release	Mapping score
ENSG00000176276.1	ENSG00000176276.2	18.1	0
ENSG00000176276.2	ENSG00000176276.3	21	0
ENSG00000176276.3	ENSG00000176276.4	26	0
ENSG00000176276.4	ENSG00000176276.5	38	0
ENSG00000176276.5	ENSG00000176276.6	47	0.997427
ENSG00000176276.6	ENSG00000176276.7	55	0.898262
ENSG00000176276.7	ENSG00000176276.8	58	0.968206
ENSG00000176276.8	ENSG00000255473.1	61	0.968585
ENSG00000176276.8	ENSG00000254893.1	61	0.97614
ENSG00000176276.8	<retired>	61	0
Old stable ID	New stable ID	Release	Mapping score
ENSG00000177764.1	ENSG00000177764.2	26	0
ENSG00000177764.2	ENSG00000177764.3	38	0
ENSG00000177764.3	ENSG00000177764.4	47	0.700738
ENSG00000177764.4	ENSG00000177764.5	55	0.92133
ENSG00000177764.5	ENSG00000177764.6	62	0.927067
ENSG00000177764.6	<retired>	76	0
Old stable ID	New stable ID	Release	Mapping score
ENSG00000178729.1	ENSG00000178729.2	21	0
ENSG00000178729.2	ENSG00000178729.3	26	0
ENSG00000178729.3	ENSG00000178729.4	47	0.296502
ENSG00000178729.4	ENSG00000178729.5	50	0.659424
ENSG00000178729.5	ENSG00000178729.6	55	0.954409
ENSG00000178729.6	ENSG00000178729.7	56	0.788691
ENSG00000178729.7	<retired>	58	0
Old stable ID	New stable ID	Release	Mapping score
ENSG00000179036.1	ENSG00000179036.2	18.1	0
ENSG00000179036.2	ENSG00000179036.3	18.2	0
ENSG00000179036.3	ENSG00000179036.4	21	0
ENSG00000179036.4	ENSG00000179036.5	26	0
ENSG00000179036.5	ENSG00000179036.6	38	0
ENSG00000179036.6	ENSG00000179036.7	47	0.408975
ENSG00000179036.7	ENSG00000179036.8	50	0.856079
ENSG00000179036.8	<retired>	55	0
Old stable ID	New stable ID	Release	Mapping score
ENSG00000179087.1	ENSG00000179087.2	15	0
ENSG00000179087.2	ENSG00000179087.3	26	0
ENSG00000179087.3	ENSG00000179087.4	40	0.513154
ENSG00000179087.4	ENSG00000179087.5	47	0.732524
ENSG00000179087.5	ENSG00000179087.6	55	0.997855
ENSG00000179087.6	ENSG00000179087.7	56	0.812892
ENSG00000179087.7	ENSG00000179087.8	60	0.990751
ENSG00000179087.8	ENSG00000179087.9	61	0.980466
ENSG00000179087.9	ENSG00000179087.10	62	0.989881
ENSG00000179087.10	<retired>	64	0
Old stable ID	New stable ID	Release	Mapping score
ENSG00000179837.1	ENSG00000179837.2	15	0
ENSG00000179837.2	ENSG00000179837.3	21	0
ENSG00000179837.3	ENSG00000179837.4	38	0
ENSG00000179837.4	ENSG00000179837.5	62	0.883487
ENSG00000179837.5	ENSG00000179837.6	68	0.884846
ENSG00000179837.6	<retired>	76	0
Old stable ID	New stable ID	Release	Mapping score
ENSG00000180771.1	ENSG00000180771.2	15	0
ENSG00000180771.1	<retired>	76	0
ENSG00000180771.2	ENSG00000180771.3	18.1	0
ENSG00000180771.3	ENSG00000180771.4	26	0
ENSG00000180771.4	ENSG00000180771.5	47	0.76592
ENSG00000180771.5	ENSG00000180771.6	50	0.614564
ENSG00000180771.6	ENSG00000180771.7	55	0.206287
ENSG00000180771.7	ENSG00000180771.8	61	0.906527
ENSG00000180771.8	ENSG00000180771.9	62	0.923354
ENSG00000180771.9	ENSG00000180771.10	73	0.839351
ENSG00000180771.10	<retired>	76	0
Old stable ID	New stable ID	Release	Mapping score
ENSG00000182217.1	ENSG00000182217.2	38	0
ENSG00000182217.2	ENSG00000182217.3	40	0.666667
ENSG00000182217.3	ENSG00000182217.4	47	0.317733
ENSG00000182217.4	ENSG00000182217.5	50	0.999516
ENSG00000182217.5	ENSG00000182217.6	56	0.999516
ENSG00000182217.6	ENSG00000182217.7	68	0.978285
ENSG00000182217.7	<retired>	76	0
Old stable ID	New stable ID	Release	Mapping score
ENSG00000182242.1	ENSG00000182242.2	26	0
ENSG00000182242.2	ENSG00000182242.3	38	0
ENSG00000182242.3	ENSG00000182242.4	47	0.686116
ENSG00000182242.4	ENSG00000182242.5	55	0.912625
ENSG00000182242.5	ENSG00000182242.6	56	0.983242
ENSG00000182242.6	ENSG00000182242.7	62	0.944935
ENSG00000182242.7	<retired>	76	0
Old stable ID	New stable ID	Release	Mapping score
ENSG00000182314.1	ENSG00000182314.2	26	0
ENSG00000182314.2	ENSG00000182314.3	38	0
ENSG00000182314.3	ENSG00000182314.4	47	0.988611
ENSG00000182314.4	ENSG00000182314.5	50	0.988983
ENSG00000182314.5	<retired>	55	0
Old stable ID	New stable ID	Release	Mapping score
ENSG00000182498.2	ENSG00000182498.3	18.1	0
ENSG00000182498.3	ENSG00000182498.4	38	0
ENSG00000182498.4	ENSG00000182498.5	47	0.984403
ENSG00000182498.5	ENSG00000182498.6	50	0.965495
ENSG00000182498.6	<retired>	55	0
ENSG00000182498.6	ENSG00000226225.1	55	0.953222
ENSG00000182498.6	ENSG00000235650.1	55	0.953222
ENSG00000182498.6	ENSG00000223367.1	55	0.953222
ENSG00000182498.6	ENSG00000231500.1	55	0.953222
Old stable ID	New stable ID	Release	Mapping score
ENSG00000182500.1	ENSG00000182500.2	21	0
ENSG00000182500.2	ENSG00000182500.3	26	0
ENSG00000182500.3	ENSG00000182500.4	38	0
ENSG00000182500.4	ENSG00000182500.5	50	0.993396
ENSG00000182500.5	ENSG00000182500.6	55	0.990591
ENSG00000182500.6	ENSG00000182500.7	62	0.668447
ENSG00000182500.7	<retired>	76	0
Old stable ID	New stable ID	Release	Mapping score
ENSG00000182502.1	ENSG00000182502.2	38	0
ENSG00000182502.2	<retired>	76	0
Old stable ID	New stable ID	Release	Mapping score
ENSG00000182572.1	ENSG00000182572.2	62	0.94793
ENSG00000182572.2	ENSG00000275379.1	76	0.930818
ENSG00000182572.2	<retired>	76	0
ENSG00000182572.2	ENSG00000277775.1	76	0.925676
ENSG00000182572.2	ENSG00000274750.1	76	0.925676
ENSG00000182572.2	ENSG00000275714.1	76	0.925676
ENSG00000182572.2	ENSG00000274267.1	76	0.925676
ENSG00000182572.2	ENSG00000278272.1	76	0.925676
Old stable ID	New stable ID	Release	Mapping score
ENSG00000182611.1	ENSG00000182611.2	55	0.955898
ENSG00000182611.2	ENSG00000182611.3	62	0.870588
ENSG00000182611.3	ENSG00000275221.1	76	0.863892
ENSG00000182611.3	ENSG00000278677.1	76	0.863892
ENSG00000182611.3	ENSG00000276903.1	76	0.861642
ENSG00000182611.3	ENSG00000274997.1	76	0.876557
ENSG00000182611.3	ENSG00000278463.1	76	0.872891
ENSG00000182611.3	ENSG00000276368.1	76	0.890121
ENSG00000182611.3	<retired>	76	0
ENSG00000182611.3	ENSG00000277075.1	76	0.863892
Old stable ID	New stable ID	Release	Mapping score
ENSG00000183038.1	ENSG00000183038.2	18.1	0
ENSG00000183038.2	ENSG00000183038.3	21	0
ENSG00000183038.3	ENSG00000183038.4	26	0
ENSG00000183038.4	ENSG00000183038.5	38	0
ENSG00000183038.5	ENSG00000183038.6	47	0.539671
ENSG00000183038.6	ENSG00000183038.7	50	0.894024
ENSG00000183038.7	ENSG00000183038.8	55	0.923585
ENSG00000183038.8	ENSG00000183038.9	62	0.961247
ENSG00000183038.9	<retired>	76	0
Old stable ID	New stable ID	Release	Mapping score
ENSG00000183093.1	ENSG00000183093.2	21	0
ENSG00000183093.2	ENSG00000183093.3	26	0
ENSG00000183093.3	ENSG00000183093.4	38	0
ENSG00000183093.4	ENSG00000183093.5	50	0.959708
ENSG00000183093.5	<retired>	62	0
Old stable ID	New stable ID	Release	Mapping score
ENSG00000183403.1	ENSG00000183403.2	56	0.998444
ENSG00000183403.2	<retired>	60	0
ENSG00000183403.2	ENSG00000254147.1	60	1
ENSG00000183403.2	ENSG00000253511.1	60	1
Old stable ID	New stable ID	Release	Mapping score
ENSG00000183405.1	ENSG00000183405.2	38	0
ENSG00000183405.2	ENSG00000183405.3	56	0.955441
ENSG00000183405.3	ENSG00000183405.4	58	0.949037
ENSG00000183405.4	ENSG00000183405.5	62	0.982939
ENSG00000183405.5	<retired>	76	0
Old stable ID	New stable ID	Release	Mapping score
ENSG00000183473.1	ENSG00000183473.2	26	0
ENSG00000183473.2	ENSG00000183473.3	38	0
ENSG00000183473.3	ENSG00000183473.4	50	0.890039
ENSG00000183473.4	ENSG00000183473.5	56	0.85533
ENSG00000183473.5	<retired>	76	0
Old stable ID	New stable ID	Release	Mapping score
ENSG00000183558.1	ENSG00000183558.2	38	0
ENSG00000183558.2	ENSG00000183558.3	47	0.832123
ENSG00000183558.3	ENSG00000183558.4	55	0.794607
ENSG00000183558.4	ENSG00000183558.5	62	0.774127
ENSG00000183558.5	<retired>	76	0
Old stable ID	New stable ID	Release	Mapping score
ENSG00000183748.1	ENSG00000183748.2	38	0
ENSG00000183748.2	ENSG00000183748.3	40	0.666667
ENSG00000183748.3	ENSG00000183748.4	55	0.942014
ENSG00000183748.4	<retired>	76	0
Old stable ID	New stable ID	Release	Mapping score
ENSG00000183941.1	ENSG00000183941.2	38	0
ENSG00000183941.2	ENSG00000183941.3	40	0.666667
ENSG00000183941.3	ENSG00000183941.4	47	0.179625
ENSG00000183941.4	ENSG00000183941.5	50	0.979809
ENSG00000183941.5	ENSG00000183941.6	56	0.999516
ENSG00000183941.6	ENSG00000183941.7	68	0.976347
ENSG00000183941.7	ENSG00000183941.8	74	0.970335
ENSG00000183941.8	<retired>	76	0
Old stable ID	New stable ID	Release	Mapping score
ENSG00000184348.1	ENSG00000184348.2	55	0.944974
ENSG00000184348.2	ENSG00000276368.1	76	0.90673
ENSG00000184348.2	<retired>	76	0
ENSG00000184348.2	ENSG00000277075.1	76	0.916764
ENSG00000184348.2	ENSG00000275221.1	76	0.927174
ENSG00000184348.2	ENSG00000278677.1	76	0.919109
ENSG00000184348.2	ENSG00000276903.1	76	0.919109
ENSG00000184348.2	ENSG00000274997.1	76	0.904368
ENSG00000184348.2	ENSG00000278463.1	76	0.916764
Old stable ID	New stable ID	Release	Mapping score
ENSG00000184674.1	ENSG00000184674.2	26	0
ENSG00000184674.2	ENSG00000184674.3	38	0
ENSG00000184674.3	ENSG00000184674.4	55	0.767422
ENSG00000184674.4	ENSG00000184674.5	56	0.829446
ENSG00000184674.5	ENSG00000184674.6	58	0.971807
ENSG00000184674.6	ENSG00000184674.7	62	0.967984
ENSG00000184674.7	ENSG00000184674.8	68	0.990926
ENSG00000184674.8	<retired>	76	0
Old stable ID	New stable ID	Release	Mapping score
ENSG00000184701.1	<retired>	61	0
Old stable ID	New stable ID	Release	Mapping score
ENSG00000184779.1	ENSG00000184779.2	21	0
ENSG00000184779.2	ENSG00000184779.3	26	0
ENSG00000184779.3	ENSG00000184779.4	38	0
ENSG00000184779.4	ENSG00000184779.5	50	0.940902
ENSG00000184779.5	ENSG00000184779.6	55	0.997828
ENSG00000184779.6	ENSG00000184779.7	56	0.933445
ENSG00000184779.7	ENSG00000184779.8	65	0.444068
ENSG00000184779.8	<retired>	76	0
Old stable ID	New stable ID	Release	Mapping score
ENSG00000184825.1	ENSG00000184825.2	26	0
ENSG00000184825.2	ENSG00000184825.3	38	0
ENSG00000184825.3	ENSG00000184825.4	47	0.731784
ENSG00000184825.4	ENSG00000274997.1	76	0.923414
ENSG00000184825.4	ENSG00000278463.1	76	0.901176
ENSG00000184825.4	ENSG00000276368.1	76	0.917062
ENSG00000184825.4	<retired>	76	0
ENSG00000184825.4	ENSG00000277075.1	76	0.901176
ENSG00000184825.4	ENSG00000275221.1	76	0.901176
ENSG00000184825.4	ENSG00000278677.1	76	0.901176
ENSG00000184825.4	ENSG00000276903.1	76	0.903529
Old stable ID	New stable ID	Release	Mapping score
ENSG00000184886.1	ENSG00000184886.2	55	0.926268
ENSG00000184886.2	ENSG00000184886.3	69	0.890426
ENSG00000184886.3	<retired>	76	0
Old stable ID	New stable ID	Release	Mapping score
ENSG00000184902.1	ENSG00000184902.2	26	0
ENSG00000184902.2	ENSG00000184902.3	38	0
ENSG00000184902.3	ENSG00000184902.4	47	0.989076
ENSG00000184902.4	<retired>	62	0
Old stable ID	New stable ID	Release	Mapping score
ENSG00000185036.1	ENSG00000185036.2	26	0
ENSG00000185036.2	ENSG00000185036.3	38	0
ENSG00000185036.3	ENSG00000185036.4	47	0.69403
ENSG00000185036.4	<retired>	62	0
Old stable ID	New stable ID	Release	Mapping score
ENSG00000185041.1	ENSG00000185041.2	55	0.995
ENSG00000185041.2	ENSG00000185041.3	58	0.96624
ENSG00000185041.3	ENSG00000185041.4	62	0.997502
ENSG00000185041.4	ENSG00000185041.5	76	0.997769
ENSG00000185041.5	<retired>	88	0
Old stable ID	New stable ID	Release	Mapping score
ENSG00000185051.1	ENSG00000185051.2	18.1	0
ENSG00000185051.2	ENSG00000185051.3	21	0
ENSG00000185051.3	ENSG00000185051.4	38	0
ENSG00000185051.4	ENSG00000185051.5	47	0.827341
ENSG00000185051.5	ENSG00000185051.6	55	0.921519
ENSG00000185051.6	<retired>	62	0
Old stable ID	New stable ID	Release	Mapping score
ENSG00000185057.2	ENSG00000185057.3	18.1	0
ENSG00000185057.3	ENSG00000185057.4	38	0
ENSG00000185057.4	ENSG00000185057.5	47	0.519056
ENSG00000185057.5	ENSG00000185057.6	50	0.860415
ENSG00000185057.6	ENSG00000185057.7	56	0.858679
ENSG00000185057.7	<retired>	58	0
Old stable ID	New stable ID	Release	Mapping score
ENSG00000185068.1	ENSG00000185068.2	18.1	0
ENSG00000185068.2	ENSG00000185068.3	21	0
ENSG00000185068.3	ENSG00000185068.4	26	0
ENSG00000185068.4	ENSG00000185068.5	38	0
ENSG00000185068.5	ENSG00000185068.6	47	0.675246
ENSG00000185068.6	ENSG00000185068.7	50	0.0486674
ENSG00000185068.7	ENSG00000185068.8	55	0.508569
ENSG00000185068.8	ENSG00000185068.9	61	0.992348
ENSG00000185068.9	ENSG00000185068.10	62	0.957732
ENSG00000185068.10	<retired>	73	0
Old stable ID	New stable ID	Release	Mapping score
ENSG00000185128.1	ENSG00000185128.2	18.1	0
ENSG00000185128.1	<retired>	76	0
ENSG00000185128.2	ENSG00000185128.3	18.2	0
ENSG00000185128.3	ENSG00000185128.4	21	0
ENSG00000185128.4	ENSG00000185128.5	38	0
ENSG00000185128.5	ENSG00000185128.6	47	0.748175
ENSG00000185128.6	ENSG00000185128.7	50	0.997558
ENSG00000185128.7	ENSG00000185128.8	55	0.9286
ENSG00000185128.8	ENSG00000185128.9	58	0.908991
ENSG00000185128.9	ENSG00000185128.10	62	0.948191
ENSG00000185128.10	ENSG00000185128.11	68	0.995163
ENSG00000185128.11	<retired>	76	0
Old stable ID	New stable ID	Release	Mapping score
ENSG00000185254.1	ENSG00000185254.2	26	0
ENSG00000185254.2	ENSG00000185254.3	27	0
ENSG00000185254.3	ENSG00000185254.4	38	0
ENSG00000185254.4	ENSG00000185254.5	47	0.859875
ENSG00000185254.5	ENSG00000185254.6	55	0.894126
ENSG00000185254.6	ENSG00000185254.7	56	0.980822
ENSG00000185254.7	ENSG00000185254.8	62	0.989953
ENSG00000185254.8	<retired>	76	0
Old stable ID	New stable ID	Release	Mapping score
ENSG00000185554.1	ENSG00000185554.2	18.1	0
ENSG00000185554.1	<retired>	76	0
ENSG00000185554.2	ENSG00000185554.3	26	0
ENSG00000185554.3	ENSG00000185554.4	38	0
ENSG00000185554.4	ENSG00000185554.5	40	0.848748
ENSG00000185554.5	ENSG00000185554.6	47	0.753331
ENSG00000185554.6	ENSG00000185554.7	50	0.998022
ENSG00000185554.7	ENSG00000185554.8	55	0.994609
ENSG00000185554.8	ENSG00000185554.9	56	0.988071
ENSG00000185554.9	ENSG00000185554.10	62	0.99012
ENSG00000185554.10	<retired>	76	0
Old stable ID	New stable ID	Release	Mapping score
ENSG00000185602.1	ENSG00000185602.2	21	0
ENSG00000185602.2	ENSG00000185602.3	38	0
ENSG00000185602.3	ENSG00000185602.4	55	0.773832
ENSG00000185602.4	<retired>	62	0
Old stable ID	New stable ID	Release	Mapping score
ENSG00000185945.1	ENSG00000185945.2	26	0
ENSG00000185945.2	ENSG00000185945.3	38	0
ENSG00000185945.3	ENSG00000185945.4	40	0.933637
ENSG00000185945.4	ENSG00000185945.5	47	0.83561
ENSG00000185945.5	ENSG00000185945.6	50	0.999939
ENSG00000185945.6	ENSG00000185945.7	55	0.960054
ENSG00000185945.7	ENSG00000185945.8	56	0.980826
ENSG00000185945.8	ENSG00000185945.9	62	0.951579
ENSG00000185945.9	<retired>	76	0
Old stable ID	New stable ID	Release	Mapping score
ENSG00000185984.1	ENSG00000185984.2	18.2	0
ENSG00000185984.2	ENSG00000185984.3	21	0
ENSG00000185984.3	ENSG00000185984.4	26	0
ENSG00000185984.4	ENSG00000185984.5	38	0
ENSG00000185984.5	ENSG00000185984.6	47	0.651793
ENSG00000185984.6	ENSG00000185984.7	55	0.618822
ENSG00000185984.7	<retired>	60	0
Old stable ID	New stable ID	Release	Mapping score
ENSG00000186223.1	ENSG00000186223.2	55	0.979464
ENSG00000186223.2	ENSG00000186223.3	61	0.966014
ENSG00000186223.3	ENSG00000186223.4	62	0.96578
ENSG00000186223.4	<retired>	88	0
Old stable ID	New stable ID	Release	Mapping score
ENSG00000186232.1	ENSG00000186232.2	61	0.966014
ENSG00000186232.2	ENSG00000186232.3	76	0.999142
ENSG00000186232.3	<retired>	88	0
Old stable ID	New stable ID	Release	Mapping score
ENSG00000186530.1	ENSG00000186530.2	21	0
ENSG00000186530.1	<retired>	76	0
ENSG00000186530.2	ENSG00000186530.3	26	0
ENSG00000186530.3	ENSG00000186530.4	38	0
ENSG00000186530.4	ENSG00000186530.5	47	0.708329
ENSG00000186530.5	ENSG00000186530.6	50	0.981431
ENSG00000186530.6	ENSG00000186530.7	52	0.980668
ENSG00000186530.7	ENSG00000186530.8	55	0.943653
ENSG00000186530.8	ENSG00000186530.9	56	0.997177
ENSG00000186530.9	ENSG00000186530.10	60	0.996484
ENSG00000186530.10	ENSG00000186530.11	61	0.989272
ENSG00000186530.11	ENSG00000186530.12	62	0.997716
ENSG00000186530.12	ENSG00000186530.13	71	0.953604
ENSG00000186530.13	<retired>	76	0
Old stable ID	New stable ID	Release	Mapping score
ENSG00000186629.1	ENSG00000186629.2	26	0
ENSG00000186629.2	ENSG00000186629.3	47	0.988112
ENSG00000186629.3	<retired>	62	0
Old stable ID	New stable ID	Release	Mapping score
ENSG00000187008.1	ENSG00000187008.2	61	0.965898
ENSG00000187008.2	<retired>	76	0
Old stable ID	New stable ID	Release	Mapping score
ENSG00000187145.1	ENSG00000187145.2	18.2	0
ENSG00000187145.1	<retired>	76	0
ENSG00000187145.2	ENSG00000187145.3	21	0
ENSG00000187145.3	ENSG00000187145.4	26	0
ENSG00000187145.4	ENSG00000187145.5	27	0
ENSG00000187145.5	ENSG00000187145.6	38	0
ENSG00000187145.6	ENSG00000187145.7	47	0.275521
ENSG00000187145.7	ENSG00000187145.8	50	0.97409
ENSG00000187145.8	ENSG00000187145.9	55	0.858363
ENSG00000187145.9	ENSG00000187145.10	56	0.775413
ENSG00000187145.10	<retired>	76	0
Old stable ID	New stable ID	Release	Mapping score
ENSG00000187711.1	<retired>	62	0
Old stable ID	New stable ID	Release	Mapping score
ENSG00000187786.1	<retired>	76	0
Old stable ID	New stable ID	Release	Mapping score
ENSG00000187939.1	ENSG00000187939.2	26	0
ENSG00000187939.2	ENSG00000187939.3	38	0
ENSG00000187939.3	ENSG00000187939.4	47	0.572749
ENSG00000187939.4	ENSG00000187939.5	50	0.933455
ENSG00000187939.5	ENSG00000187939.6	55	0.902388
ENSG00000187939.6	ENSG00000187939.7	56	0.999216
ENSG00000187939.7	ENSG00000187939.8	58	0.999221
ENSG00000187939.8	ENSG00000187939.9	67	0.967888
ENSG00000187939.9	ENSG00000272636.1	74	0.862056
ENSG00000187939.9	<retired>	74	0
ENSG00000187939.9	ENSG00000272670.1	74	0.862056
Old stable ID	New stable ID	Release	Mapping score
ENSG00000187990.1	ENSG00000187990.2	38	0
ENSG00000187990.2	ENSG00000187990.3	47	0.55413
ENSG00000187990.3	ENSG00000187990.4	62	0.94572
ENSG00000187990.4	ENSG00000273703.1	76	0.922518
ENSG00000187990.4	ENSG00000276410.1	76	0.922518
ENSG00000187990.4	ENSG00000274290.1	76	0.921781
ENSG00000187990.4	<retired>	76	0
ENSG00000187990.4	ENSG00000278588.1	76	0.922518
ENSG00000187990.4	ENSG00000275713.1	76	0.922518
ENSG00000187990.4	ENSG00000273802.1	76	0.854864
ENSG00000187990.4	ENSG00000277224.1	76	0.922518
ENSG00000187990.4	ENSG00000274641.1	76	0.922518
Old stable ID	New stable ID	Release	Mapping score
ENSG00000188014.1	ENSG00000188014.2	26	0
ENSG00000188014.2	ENSG00000188014.3	38	0
ENSG00000188014.3	ENSG00000188014.4	55	0.987936
ENSG00000188014.4	<retired>	58	0
Old stable ID	New stable ID	Release	Mapping score
ENSG00000188073.1	ENSG00000188073.2	26	0
ENSG00000188073.2	ENSG00000188073.3	38	0
ENSG00000188073.3	ENSG00000188073.4	47	0.993885
ENSG00000188073.4	ENSG00000188073.5	50	0.998628
ENSG00000188073.5	ENSG00000188073.6	55	0.855621
ENSG00000188073.6	ENSG00000188073.7	62	0.942421
ENSG00000188073.7	<retired>	76	0
Old stable ID	New stable ID	Release	Mapping score
ENSG00000188126.1	ENSG00000188126.2	26	0
ENSG00000188126.2	ENSG00000188126.3	38	0
ENSG00000188126.3	ENSG00000188126.4	47	0.914274
ENSG00000188126.4	ENSG00000188126.5	50	0.914274
ENSG00000188126.5	ENSG00000188126.6	55	0.990291
ENSG00000188126.6	ENSG00000188126.7	62	0.586496
ENSG00000188126.7	<retired>	73	0
Old stable ID	New stable ID	Release	Mapping score
ENSG00000188447.1	ENSG00000188447.2	26	0
ENSG00000188447.2	<retired>	62	0
Old stable ID	New stable ID	Release	Mapping score
ENSG00000188477.1	ENSG00000188477.2	26	0
ENSG00000188477.2	ENSG00000188477.3	47	0.389155
ENSG00000188477.3	ENSG00000188477.4	55	0.934579
ENSG00000188477.4	ENSG00000188477.5	56	0.629798
ENSG00000188477.5	ENSG00000188477.6	58	0.995234
ENSG00000188477.6	ENSG00000188477.7	62	0.97568
ENSG00000188477.7	ENSG00000188477.8	66	0.703709
ENSG00000188477.8	ENSG00000188477.9	76	0.949098
ENSG00000188477.9	ENSG00000188477.10	77	1
ENSG00000188477.10	ENSG00000188477.11	79	1
ENSG00000188477.11	ENSG00000188477.12	81	1
ENSG00000188477.12	ENSG00000188477.13	85	0.949098
ENSG00000188477.13	<retired>	88	0
Old stable ID	New stable ID	Release	Mapping score
ENSG00000188686.1	ENSG00000188686.2	61	0.849852
ENSG00000188686.2	<retired>	76	0
Old stable ID	New stable ID	Release	Mapping score
ENSG00000188699.1	ENSG00000188699.2	38	0
ENSG00000188699.2	ENSG00000188699.3	47	0.943939
ENSG00000188699.3	<retired>	62	0
Old stable ID	New stable ID	Release	Mapping score
ENSG00000188792.1	<retired>	62	0
Old stable ID	New stable ID	Release	Mapping score
ENSG00000188863.1	ENSG00000188863.2	26	0
ENSG00000188863.2	ENSG00000188863.3	38	0
ENSG00000188863.3	ENSG00000188863.4	47	0.838091
ENSG00000188863.4	ENSG00000188863.5	50	0.838091
ENSG00000188863.5	<retired>	62	0
Old stable ID	New stable ID	Release	Mapping score
ENSG00000188888.1	ENSG00000188888.2	26	0
ENSG00000188888.2	ENSG00000188888.3	38	0
ENSG00000188888.3	ENSG00000188888.4	47	0.664289
ENSG00000188888.4	ENSG00000188888.5	56	0.970077
ENSG00000188888.5	ENSG00000188888.6	62	0.999944
ENSG00000188888.6	ENSG00000188888.7	68	0.975552
ENSG00000188888.7	<retired>	76	0
Old stable ID	New stable ID	Release	Mapping score
ENSG00000188987.1	ENSG00000188987.2	55	0.943241
ENSG00000188987.2	ENSG00000275126.1	76	0.918999
ENSG00000188987.2	<retired>	76	0
ENSG00000188987.2	ENSG00000277157.1	76	0.925068
ENSG00000188987.2	ENSG00000274618.1	76	0.918999
ENSG00000188987.2	ENSG00000276966.1	76	0.918999
ENSG00000188987.2	ENSG00000273542.1	76	0.918999
ENSG00000188987.2	ENSG00000278637.1	76	0.918999
Old stable ID	New stable ID	Release	Mapping score
ENSG00000196176.1	ENSG00000196176.2	38	0
ENSG00000196176.2	ENSG00000196176.3	47	0.636231
ENSG00000196176.3	ENSG00000196176.4	50	0.987687
ENSG00000196176.4	ENSG00000196176.5	55	0.792221
ENSG00000196176.5	ENSG00000196176.6	62	0.78452
ENSG00000196176.6	ENSG00000196176.7	68	0.78452
ENSG00000196176.7	ENSG00000278637.1	76	0.919355
ENSG00000196176.7	ENSG00000275126.1	76	0.912281
ENSG00000196176.7	<retired>	76	0
ENSG00000196176.7	ENSG00000277157.1	76	0.912281
ENSG00000196176.7	ENSG00000274618.1	76	0.912281
ENSG00000196176.7	ENSG00000276966.1	76	0.912281
ENSG00000196176.7	ENSG00000273542.1	76	0.912281
Old stable ID	New stable ID	Release	Mapping score
ENSG00000196226.1	ENSG00000196226.2	55	0.956855
ENSG00000196226.2	ENSG00000274641.1	76	0.938424
ENSG00000196226.2	<retired>	76	0
ENSG00000196226.2	ENSG00000276410.1	76	0.941995
ENSG00000196226.2	ENSG00000274290.1	76	0.932681
ENSG00000196226.2	ENSG00000278588.1	76	0.938424
ENSG00000196226.2	ENSG00000275713.1	76	0.938424
ENSG00000196226.2	ENSG00000273703.1	76	0.938424
ENSG00000196226.2	ENSG00000277224.1	76	0.938424
Old stable ID	New stable ID	Release	Mapping score
ENSG00000196285.1	ENSG00000196285.2	38	0
ENSG00000196285.2	ENSG00000196285.3	47	0.986692
ENSG00000196285.3	<retired>	55	0
Old stable ID	New stable ID	Release	Mapping score
ENSG00000196292.1	ENSG00000196292.2	47	0.6197
ENSG00000196292.2	ENSG00000196292.3	50	0.973298
ENSG00000196292.3	<retired>	55	0
Old stable ID	New stable ID	Release	Mapping score
ENSG00000196318.1	ENSG00000196318.2	38	0
ENSG00000196318.2	ENSG00000196318.3	47	0.648619
ENSG00000196318.3	ENSG00000237763.1	55	0.896155
ENSG00000196318.3	ENSG00000227408.1	55	0.748356
ENSG00000196318.3	<retired>	55	0
Old stable ID	New stable ID	Release	Mapping score
ENSG00000196331.1	ENSG00000196331.2	38	0
ENSG00000196331.2	ENSG00000196331.3	47	0.635045
ENSG00000196331.3	ENSG00000196331.4	50	0.962222
ENSG00000196331.4	ENSG00000196331.5	55	0.962222
ENSG00000196331.5	<retired>	76	0
ENSG00000196331.5	ENSG00000276410.1	76	0.898585
ENSG00000196331.5	ENSG00000274290.1	76	0.902696
ENSG00000196331.5	ENSG00000278588.1	76	0.898585
ENSG00000196331.5	ENSG00000275713.1	76	0.898585
ENSG00000196331.5	ENSG00000273703.1	76	0.898585
ENSG00000196331.5	ENSG00000277224.1	76	0.898585
ENSG00000196331.5	ENSG00000274641.1	76	0.907923
Old stable ID	New stable ID	Release	Mapping score
ENSG00000196347.1	<retired>	62	0
Old stable ID	New stable ID	Release	Mapping score
ENSG00000196374.1	ENSG00000196374.2	38	0
ENSG00000196374.2	ENSG00000196374.3	47	0.678429
ENSG00000196374.3	ENSG00000196374.4	50	0.973099
ENSG00000196374.4	ENSG00000196374.5	55	0.973087
ENSG00000196374.5	<retired>	76	0
ENSG00000196374.5	ENSG00000276410.1	76	0.921403
ENSG00000196374.5	ENSG00000274290.1	76	0.925481
ENSG00000196374.5	ENSG00000278588.1	76	0.921403
ENSG00000196374.5	ENSG00000275713.1	76	0.921403
ENSG00000196374.5	ENSG00000273703.1	76	0.92713
ENSG00000196374.5	ENSG00000277224.1	76	0.921403
ENSG00000196374.5	ENSG00000274641.1	76	0.921403
Old stable ID	New stable ID	Release	Mapping score
ENSG00000196409.1	ENSG00000196409.2	38	0
ENSG00000196409.2	ENSG00000196409.3	50	0.996691
ENSG00000196409.3	ENSG00000196409.4	55	0.853137
ENSG00000196409.4	ENSG00000196409.5	56	0.968725
ENSG00000196409.5	ENSG00000196409.6	62	0.996583
ENSG00000196409.6	ENSG00000196409.7	71	0.984135
ENSG00000196409.7	<retired>	76	0
Old stable ID	New stable ID	Release	Mapping score
ENSG00000196532.1	ENSG00000196532.2	38	0
ENSG00000196532.2	ENSG00000196532.3	47	0.872873
ENSG00000196532.3	ENSG00000196532.4	62	0.763659
ENSG00000196532.4	ENSG00000274267.1	76	0.944828
ENSG00000196532.4	ENSG00000278272.1	76	0.947712
ENSG00000196532.4	ENSG00000275379.1	76	0.944828
ENSG00000196532.4	<retired>	76	0
ENSG00000196532.4	ENSG00000277775.1	76	0.944828
ENSG00000196532.4	ENSG00000274750.1	76	0.944828
ENSG00000196532.4	ENSG00000275714.1	76	0.944828
Old stable ID	New stable ID	Release	Mapping score
ENSG00000196585.1	<retired>	62	0
Old stable ID	New stable ID	Release	Mapping score
ENSG00000196622.1	ENSG00000196622.2	38	0
ENSG00000196622.2	ENSG00000196622.3	47	0.854787
ENSG00000196622.3	ENSG00000196622.4	50	0.925931
ENSG00000196622.4	ENSG00000196622.5	55	0.979658
ENSG00000196622.5	ENSG00000196622.6	72	0.979927
ENSG00000196622.6	<retired>	76	0
Old stable ID	New stable ID	Release	Mapping score
ENSG00000196624.1	ENSG00000196624.2	47	0.993147
ENSG00000196624.2	ENSG00000196624.3	55	0.708696
ENSG00000196624.3	ENSG00000196624.4	62	0.708599
ENSG00000196624.4	<retired>	63	0
Old stable ID	New stable ID	Release	Mapping score
ENSG00000196644.1	ENSG00000196644.2	38	0
ENSG00000196644.2	ENSG00000196644.3	50	0.943536
ENSG00000196644.3	ENSG00000196644.4	55	0.972277
ENSG00000196644.4	ENSG00000196644.5	56	0.785482
ENSG00000196644.5	ENSG00000196644.6	58	0.999362
ENSG00000196644.6	ENSG00000196644.7	61	0.736904
ENSG00000196644.7	ENSG00000196644.8	62	0.730401
ENSG00000196644.8	<retired>	76	0
Old stable ID	New stable ID	Release	Mapping score
ENSG00000196774.1	ENSG00000196774.2	38	0
ENSG00000196774.2	ENSG00000196774.3	56	0.945227
ENSG00000196774.3	<retired>	76	0
Old stable ID	New stable ID	Release	Mapping score
ENSG00000196934.1	ENSG00000196934.2	55	0.973498
ENSG00000196934.2	ENSG00000196934.3	72	0.973087
ENSG00000196934.3	ENSG00000275793.1	76	0.973
ENSG00000196934.3	ENSG00000274600.1	76	0.97371
ENSG00000196934.3	<retired>	76	0
Old stable ID	New stable ID	Release	Mapping score
ENSG00000196966.1	ENSG00000196966.2	38	0
ENSG00000196966.2	ENSG00000196966.3	47	0.63694
ENSG00000196966.3	ENSG00000274750.1	76	0.944805
ENSG00000196966.3	ENSG00000275714.1	76	0.941581
ENSG00000196966.3	ENSG00000274267.1	76	0.941581
ENSG00000196966.3	ENSG00000278272.1	76	0.941581
ENSG00000196966.3	ENSG00000275379.1	76	0.941581
ENSG00000196966.3	<retired>	76	0
ENSG00000196966.3	ENSG00000277775.1	76	0.941581
Old stable ID	New stable ID	Release	Mapping score
ENSG00000197370.1	ENSG00000197370.2	47	0.575302
ENSG00000197370.2	ENSG00000197370.3	50	0.619992
ENSG00000197370.3	ENSG00000197370.4	55	0.756794
ENSG00000197370.4	ENSG00000197370.5	58	0.927467
ENSG00000197370.5	ENSG00000197370.6	60	0.963509
ENSG00000197370.6	ENSG00000197370.7	61	0.975703
ENSG00000197370.7	<retired>	62	0
Old stable ID	New stable ID	Release	Mapping score
ENSG00000197459.1	ENSG00000197459.2	47	0.948235
ENSG00000197459.2	ENSG00000274641.1	76	0.945409
ENSG00000197459.2	<retired>	76	0
ENSG00000197459.2	ENSG00000276410.1	76	0.945409
ENSG00000197459.2	ENSG00000274290.1	76	0.942047
ENSG00000197459.2	ENSG00000278588.1	76	0.945409
ENSG00000197459.2	ENSG00000275713.1	76	0.948235
ENSG00000197459.2	ENSG00000273703.1	76	0.945409
ENSG00000197459.2	ENSG00000277224.1	76	0.945409
Old stable ID	New stable ID	Release	Mapping score
ENSG00000197533.1	ENSG00000197533.2	38	0
ENSG00000197533.2	ENSG00000197533.3	47	0.23506
ENSG00000197533.3	ENSG00000197533.4	50	0.990874
ENSG00000197533.4	ENSG00000197533.5	55	0.432173
ENSG00000197533.5	<retired>	62	0
Old stable ID	New stable ID	Release	Mapping score
ENSG00000197592.1	ENSG00000197592.2	38	0
ENSG00000197592.2	ENSG00000197592.3	47	0.657856
ENSG00000197592.3	<retired>	55	0
Old stable ID	New stable ID	Release	Mapping score
ENSG00000197681.1	ENSG00000197681.2	38	0
ENSG00000197681.2	ENSG00000197681.3	47	0.667194
ENSG00000197681.3	ENSG00000197681.4	50	0.999611
ENSG00000197681.4	ENSG00000197681.5	55	0.911695
ENSG00000197681.5	ENSG00000197681.6	60	0.871508
ENSG00000197681.6	ENSG00000197681.7	62	0.981684
ENSG00000197681.7	ENSG00000197681.8	68	0.996559
ENSG00000197681.8	<retired>	76	0
Old stable ID	New stable ID	Release	Mapping score
ENSG00000197697.1	ENSG00000197697.2	38	0
ENSG00000197697.2	ENSG00000197697.3	47	0.657678
ENSG00000197697.3	ENSG00000274290.1	76	0.88833
ENSG00000197697.3	ENSG00000278588.1	76	0.867882
ENSG00000197697.3	ENSG00000275713.1	76	0.867882
ENSG00000197697.3	ENSG00000273703.1	76	0.867882
ENSG00000197697.3	ENSG00000277224.1	76	0.867882
ENSG00000197697.3	ENSG00000274641.1	76	0.867882
ENSG00000197697.3	<retired>	76	0
ENSG00000197697.3	ENSG00000276410.1	76	0.867882
Old stable ID	New stable ID	Release	Mapping score
ENSG00000197701.1	ENSG00000197701.2	38	0
ENSG00000197701.2	ENSG00000197701.3	50	0.921031
ENSG00000197701.3	ENSG00000197701.4	55	0.759779
ENSG00000197701.4	ENSG00000197701.5	58	0.809625
ENSG00000197701.5	ENSG00000197701.6	61	0.977351
ENSG00000197701.6	ENSG00000197701.7	62	0.992962
ENSG00000197701.7	<retired>	76	0
Old stable ID	New stable ID	Release	Mapping score
ENSG00000197800.1	ENSG00000197800.2	47	0.413572
ENSG00000197800.2	ENSG00000197800.3	55	0.915657
ENSG00000197800.3	ENSG00000197800.4	61	0.951721
ENSG00000197800.4	<retired>	62	0
Old stable ID	New stable ID	Release	Mapping score
ENSG00000197846.1	ENSG00000197846.2	38	0
ENSG00000197846.2	ENSG00000197846.3	47	0.801744
ENSG00000197846.3	<retired>	76	0
Old stable ID	New stable ID	Release	Mapping score
ENSG00000197914.1	ENSG00000197914.2	62	0.940678
ENSG00000197914.2	ENSG00000275126.1	76	0.936937
ENSG00000197914.2	<retired>	76	0
ENSG00000197914.2	ENSG00000276966.1	76	0.936937
ENSG00000197914.2	ENSG00000274618.1	76	0.936937
ENSG00000197914.2	ENSG00000278637.1	76	0.936937
ENSG00000197914.2	ENSG00000275663.1	76	0.90937
ENSG00000197914.2	ENSG00000273542.1	76	0.940678
ENSG00000197914.2	ENSG00000277157.1	76	0.936937
Old stable ID	New stable ID	Release	Mapping score
ENSG00000197918.1	ENSG00000197918.2	38	0
ENSG00000197918.2	ENSG00000197918.3	47	0.506173
ENSG00000197918.3	ENSG00000197918.4	55	0.993333
ENSG00000197918.4	<retired>	62	0
Old stable ID	New stable ID	Release	Mapping score
ENSG00000198014.1	ENSG00000198014.2	38	0
ENSG00000198014.2	ENSG00000198014.3	47	0.698592
ENSG00000198014.3	ENSG00000198014.4	55	0.868571
ENSG00000198014.4	ENSG00000198014.5	58	0.833829
ENSG00000198014.5	ENSG00000198014.6	60	0.833829
ENSG00000198014.6	ENSG00000198014.7	62	0.617964
ENSG00000198014.7	<retired>	64	0
Old stable ID	New stable ID	Release	Mapping score
ENSG00000198035.1	ENSG00000198035.2	38	0
ENSG00000198035.2	ENSG00000198035.3	47	0.493775
ENSG00000198035.3	ENSG00000198035.4	55	0.778322
ENSG00000198035.4	ENSG00000198035.5	56	0.934978
ENSG00000198035.5	ENSG00000198035.6	58	0.986274
ENSG00000198035.6	ENSG00000198035.7	62	0.995069
ENSG00000198035.7	ENSG00000198035.8	68	0.962007
ENSG00000198035.8	ENSG00000198035.9	69	0.941949
ENSG00000198035.9	<retired>	76	0
Old stable ID	New stable ID	Release	Mapping score
ENSG00000198161.1	ENSG00000198161.2	38	0
ENSG00000198161.2	ENSG00000198161.3	47	0.853545
ENSG00000198161.3	ENSG00000198161.4	55	0.698544
ENSG00000198161.4	ENSG00000198161.5	62	0.721281
ENSG00000198161.5	<retired>	76	0
Old stable ID	New stable ID	Release	Mapping score
ENSG00000198327.1	ENSG00000198327.2	38	0
ENSG00000198327.2	ENSG00000198327.3	47	0.804905
ENSG00000198327.3	ENSG00000274618.1	76	0.875
ENSG00000198327.3	ENSG00000277157.1	76	0.857143
ENSG00000198327.3	ENSG00000273542.1	76	0.857143
ENSG00000198327.3	ENSG00000275126.1	76	0.857143
ENSG00000198327.3	<retired>	76	0
ENSG00000198327.3	ENSG00000278637.1	76	0.857143
Old stable ID	New stable ID	Release	Mapping score
ENSG00000198339.1	ENSG00000198339.2	38	0
ENSG00000198339.2	ENSG00000198339.3	47	0.674874
ENSG00000198339.3	<retired>	76	0
Old stable ID	New stable ID	Release	Mapping score
ENSG00000198366.1	ENSG00000198366.2	38	0
ENSG00000198366.2	ENSG00000198366.3	47	0.633496
ENSG00000198366.3	ENSG00000198366.4	55	0.995717
ENSG00000198366.4	ENSG00000198366.5	62	0.997012
ENSG00000198366.5	<retired>	76	0
ENSG00000198366.5	ENSG00000277775.1	76	0.934091
ENSG00000198366.5	ENSG00000274750.1	76	0.934091
ENSG00000198366.5	ENSG00000275714.1	76	0.938166
ENSG00000198366.5	ENSG00000274267.1	76	0.934091
ENSG00000198366.5	ENSG00000278272.1	76	0.934091
ENSG00000198366.5	ENSG00000275379.1	76	0.934091
Old stable ID	New stable ID	Release	Mapping score
ENSG00000198374.1	ENSG00000198374.2	38	0
ENSG00000198374.2	ENSG00000198374.3	47	0.757173
ENSG00000198374.3	ENSG00000276903.1	76	0.842932
ENSG00000198374.3	ENSG00000275221.1	76	0.811594
ENSG00000198374.3	ENSG00000278677.1	76	0.813665
ENSG00000198374.3	<retired>	76	0
Old stable ID	New stable ID	Release	Mapping score
ENSG00000198477.1	ENSG00000198477.2	47	0.612004
ENSG00000198477.2	ENSG00000198477.3	50	0.932202
ENSG00000198477.3	<retired>	76	0
Old stable ID	New stable ID	Release	Mapping score
ENSG00000198518.1	ENSG00000198518.2	38	0
ENSG00000198518.2	ENSG00000198518.3	47	0.893901
ENSG00000198518.3	ENSG00000198518.4	50	0.992243
ENSG00000198518.4	ENSG00000198518.5	55	0.992243
ENSG00000198518.5	<retired>	76	0
Old stable ID	New stable ID	Release	Mapping score
ENSG00000198558.1	ENSG00000198558.2	55	0.94612
ENSG00000198558.2	ENSG00000275126.1	76	0.928571
ENSG00000198558.2	<retired>	76	0
ENSG00000198558.2	ENSG00000277157.1	76	0.923077
ENSG00000198558.2	ENSG00000274618.1	76	0.923077
ENSG00000198558.2	ENSG00000276966.1	76	0.923077
ENSG00000198558.2	ENSG00000273542.1	76	0.923077
ENSG00000198558.2	ENSG00000278637.1	76	0.923077
Old stable ID	New stable ID	Release	Mapping score
ENSG00000198632.1	ENSG00000198632.2	47	0.833055
ENSG00000198632.2	ENSG00000198632.3	50	0.833055
ENSG00000198632.3	ENSG00000198632.4	55	0.567744
ENSG00000198632.4	ENSG00000198632.5	56	0.950986
ENSG00000198632.5	ENSG00000198632.6	58	0.950986
ENSG00000198632.6	ENSG00000198632.7	62	0.795592
ENSG00000198632.7	<retired>	76	0
Old stable ID	New stable ID	Release	Mapping score
ENSG00000203813.1	ENSG00000203813.2	47	0.323622
ENSG00000203813.2	ENSG00000203813.3	50	0.969903
ENSG00000203813.3	ENSG00000203813.4	55	0.971076
ENSG00000203813.4	ENSG00000274267.1	76	0.929864
ENSG00000203813.4	ENSG00000278272.1	76	0.929864
ENSG00000203813.4	ENSG00000275379.1	76	0.929864
ENSG00000203813.4	<retired>	76	0
ENSG00000203813.4	ENSG00000277775.1	76	0.929864
ENSG00000203813.4	ENSG00000274750.1	76	0.929864
ENSG00000203813.4	ENSG00000275714.1	76	0.929864
Old stable ID	New stable ID	Release	Mapping score
ENSG00000203835.1	ENSG00000203835.2	47	0.977257
ENSG00000203835.2	ENSG00000203835.3	55	0.987853
ENSG00000203835.3	ENSG00000203835.4	61	0.957058
ENSG00000203835.4	ENSG00000203835.5	62	0.910752
ENSG00000203835.5	<retired>	76	0
ENSG00000203835.5	ENSG00000263366.2	76	1
Old stable ID	New stable ID	Release	Mapping score
ENSG00000203847.1	ENSG00000203847.2	47	0.95778
ENSG00000203847.2	ENSG00000203847.3	55	0.869741
ENSG00000203847.3	<retired>	62	0
Old stable ID	New stable ID	Release	Mapping score
ENSG00000204164.1	ENSG00000204164.2	47	0.386045
ENSG00000204164.2	ENSG00000204164.3	55	0.487592
ENSG00000204164.3	ENSG00000204164.4	56	0.957483
ENSG00000204164.4	ENSG00000204164.5	62	0.976303
ENSG00000204164.5	ENSG00000204164.6	72	0.973514
[truncated: 1,148 more rows]

## Sheet: C) Deprecated ENSGs not updated
Worm Genes	Deprecated ENSG	Gene name associated with deprecated ENSG (Ensembl v54, 2009)	Current ENSG(s) matched to Worm Gene	Gene name associated with current ENSGs (Ensembl v89, 2017)	Comments
WBGene00001400	ENSG00000031544	NR2E3	ENSG00000278570	NR2E3	Deprecated ENSG does not link to current ENSG in Ensembl v87
WBGene00022269	ENSG00000108270	AATF	ENSG00000275700, ENSG00000276072	AATF	Deprecated ENSG does not link to current ENSGs in Ensembl v87
WBGene00022189	ENSG00000151792	CTSO	ENSG00000256043	CTSO	Deprecated ENSG does not link to current ENSG in Ensembl v87
WBGene00022447	ENSG00000184886	PIGW	ENSG00000277161, ENSG00000275600	PIGW	Deprecated ENSG does not link to current ENSGs in Ensembl v87
WBGene00021904	ENSG00000185068	GTF2H5	ENSG00000272047	GTF2H5	Deprecated ENSG does not link to current ENSG in Ensembl v87
WBGene00018433	ENSG00000214325	AC025287.1	ENSG00000282757	DUXB	Deprecated ENSG does not link to current ENSG in Ensembl v87
WBGene00022787	ENSG00000262464	POLDIP2	ENSG00000004142	POLDIP2	Deprecated ENSG re-directs to new ENSG in Ensembl v87
WBGene00000145	ENSG00000215639	AC145207.1	ENSG00000141552	ANAPC11	Deprecated ENSG does not link to current ENSG in Ensembl v87
WBGene00000408	ENSG00000262841	CDK7	ENSG00000134058	CDK7	Deprecated ENSG does not link to current ENSG in Ensembl v87
WBGene00011218	ENSG00000006114	AP1GBP1	ENSG00000275066, ENSG00000274047	SYNRG	Deprecated ENSG does not link to current ENSGs in Ensembl v87
WBGene00009211	ENSG00000007816	WDR46	ENSG00000227057, ENSG00000206284, ENSG00000236222, ENSG00000204221, ENSG00000226916	WDR46	Deprecated ENSG does not link to current ENSGs in Ensembl v87
WBGene00022180	ENSG00000017373	AC115090.8	ENSG00000277363, ENSG00000273608	SRCIN1	Deprecated ENSG does not link to current ENSGs in Ensembl v87
WBGene00010444	ENSG00000017621	MAGI	ENSG00000269313	MAGIX	Deprecated ENSG does not link to current ENSG in Ensembl v87
WBGene00021927	ENSG00000042022	ABHD14A	ENSG00000248487	ABHD14A	Deprecated ENSG does not link to current ENSG in Ensembl v87
WBGene00008220	ENSG00000051415	AMY1A	ENSG00000237763	AMY1A	Deprecated ENSG does not link to current ENSG in Ensembl v87
WBGene00008684	ENSG00000056661	PCGF2	ENSG00000277258	PCGF2	Deprecated ENSG does not link to current ENSG in Ensembl v87
WBGene00001579	ENSG00000068793	CYFIP1	ENSG00000273749	CYFIP1	Deprecated ENSG does not link to current ENSG in Ensembl v87
WBGene00011330	ENSG00000090920	FCGBP	ENSG00000281123	FCGBP	Deprecated ENSG does not link to current ENSG in Ensembl v87
WBGene00001365, WBGene00001371	ENSG00000096238	CLIC1	ENSG00000213719	CLIC1	Deprecated ENSG does not link to current ENSG in Ensembl v87
WBGene00018131	ENSG00000096467	BAT5	ENSG00000204427, ENSG00000230475, ENSG00000206403, ENSG00000224552, ENSG00000231488, ENSG00000235676, ENSG00000236063	ABHD16A	Deprecated ENSG does not link to current ENSGs in Ensembl v87

## Sheet: D) Confirmed Deprecated ENSGs
Deprecated ENSGs	Worm Ortholog(s) in OL1	Comments
ENSG00000225754	WBGene00012734, WBGene00045239	No other H. sapiens homolog by BLAST
ENSG00000129282	WBGene00012863	No other H. sapiens homolog by BLAST
ENSG00000215211, ENSG00000230883	WBGene00019871	No other H. sapiens homolog by BLAST
ENSG00000231223	WBGene00020550	No other H. sapiens homolog by BLAST
ENSG00000206163, ENSG00000230974, ENSG00000234412, ENSG00000238159, ENSG00000231520, ENSG00000232449, ENSG00000232657, ENSG00000233000, ENSG00000224624	WBGene00021187	No other H. sapiens homolog by BLAST
ENSG00000224010	WBGene00017531	C. elegans gene deprecated (killed due to lack of evidence)
ENSG00000229318	WBGene00022535	C. elegans gene deprecated (killed due to lack of evidence)
